# Supplementary material for: Dysregulation of alternative splicing is associated with the pathogenesis of ulcerative colitis
Source: PubMed Central journal article supplement (PMC8627048; doi:10.1186/s12938-021-00959-4), 2021-11-27

S1

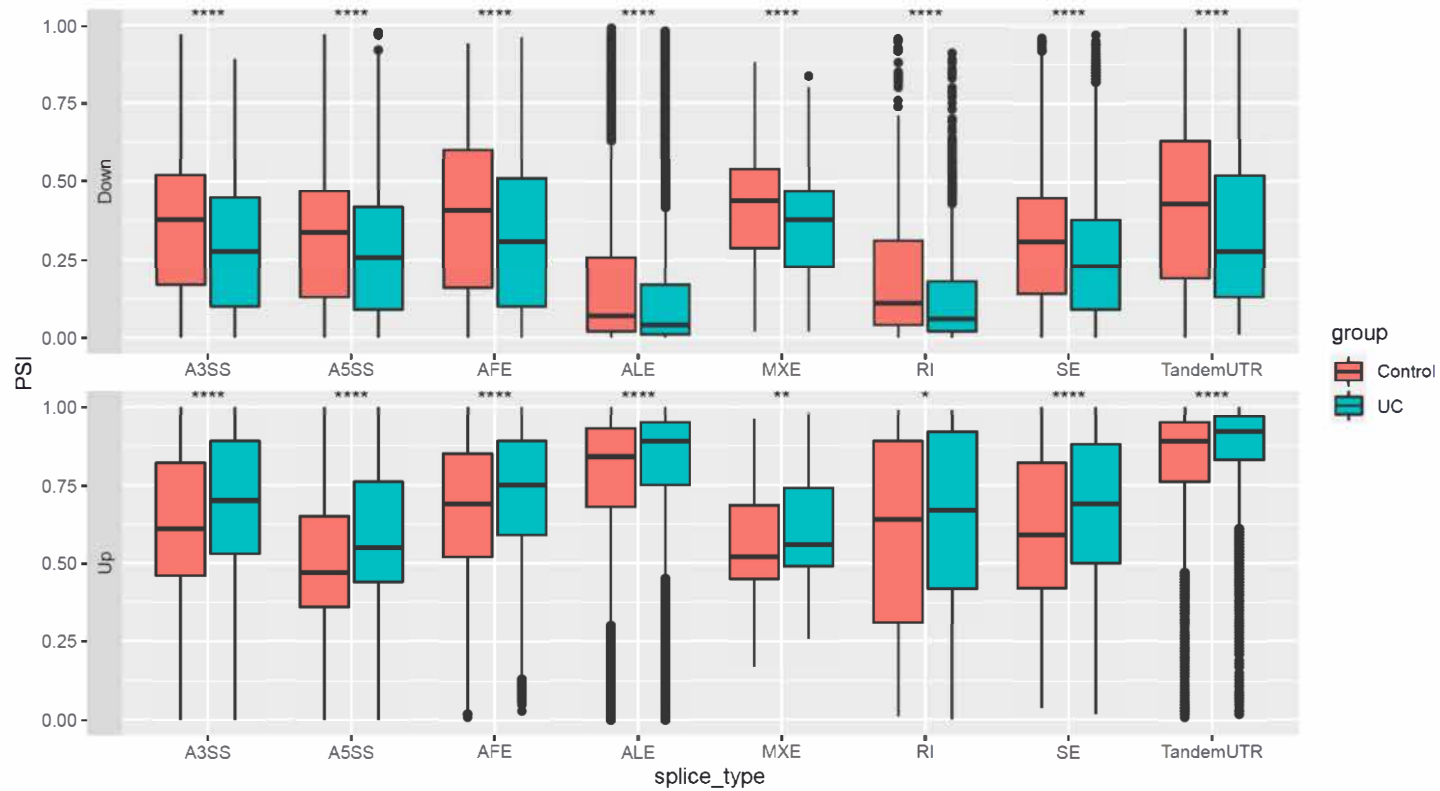

S2

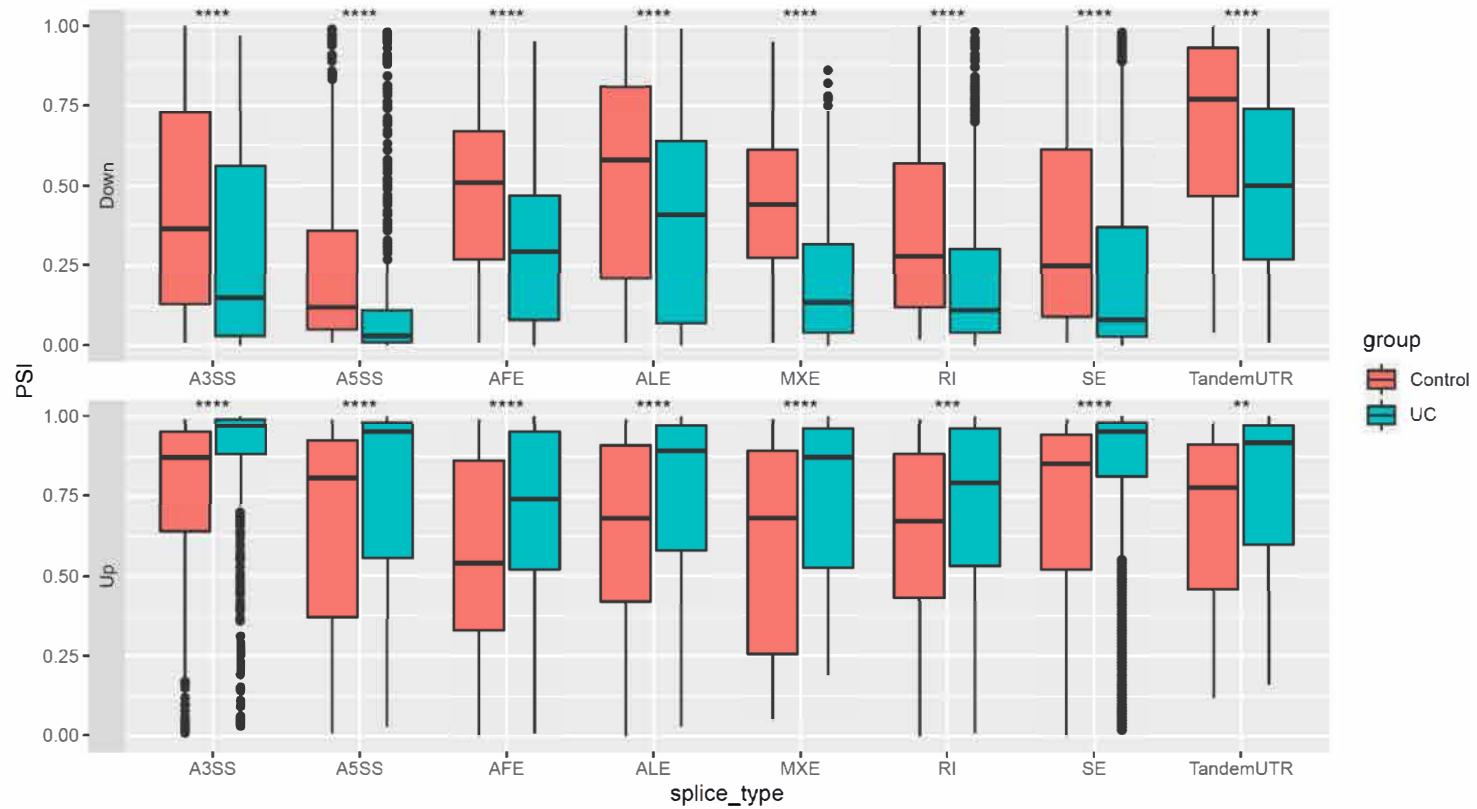

S3

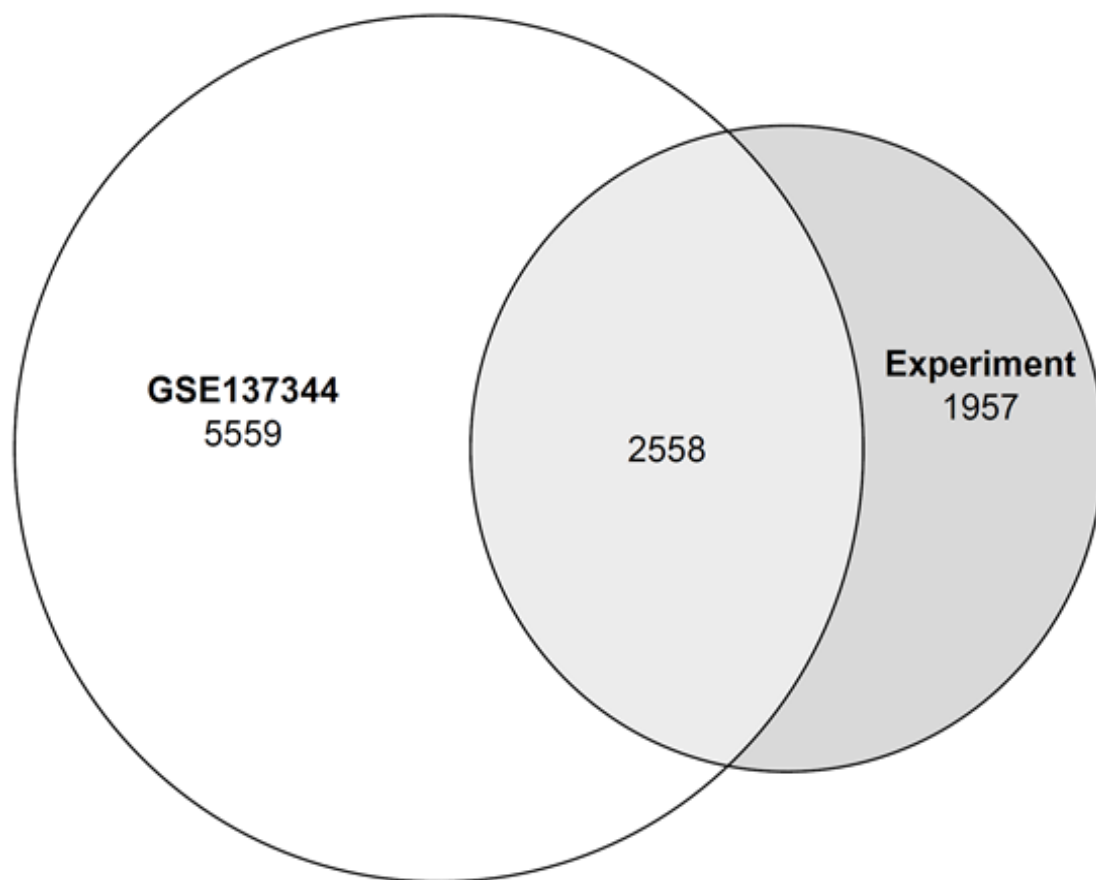



S5

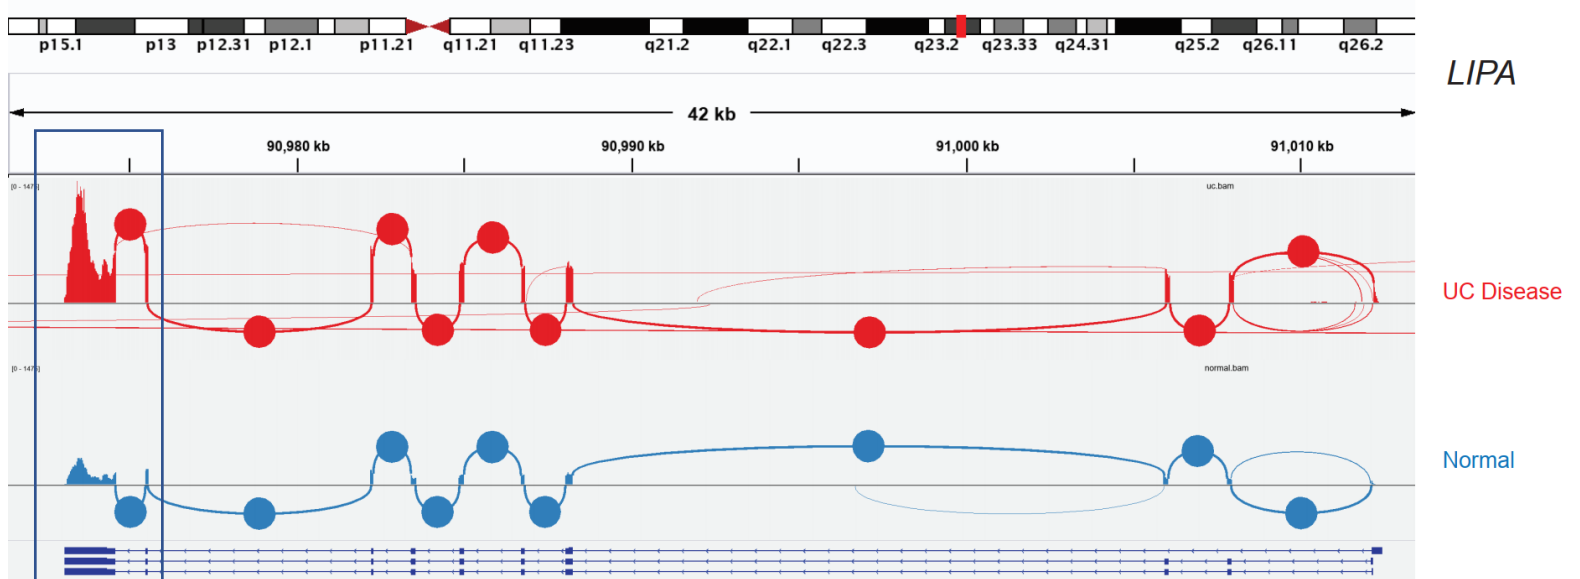

Supplement: 12938_2021_959_MOESM1_ESM.pdf [file 12938_2021_959_MOESM1_ESM.pdf]
