# Supplementary material for: Dysregulation of alternative splicing is associated with the pathogenesis of ulcerative colitis
Source: Biomed Eng Online. 2021 Nov 27;20:121. doi: 10.1186/s12938-021-00959-4 (PMC8627048; doi:10.1186/s12938-021-00959-4)
Supplement: Supplementary file 7 — Additional file 7: Table S6. Pathways which are significantly regulated via Enrichr analysis (Validation cohort). [file 12938_2021_959_MOESM7_ESM.xlsx]

## Sheet: two_subsets_sig_symbols_go
Term	Overlap	P-value	Adjusted P-value	Old P-value	Old Adjusted P-value	Odds Ratio	Combined Score	Genes
antigen processing and presentation of exogenous peptide antigen via MHC class I, TAP-independent (GO:0002480)	2021-05-09	1.74278e-05	0.0325551	0	0	27.4068	300.309	HFE;HLA-A;HLA-F;HLA-G;HLA-E
negative regulation of metabolic process (GO:0009892)	2021-04-12	0.00137014	0.999995	0	0	10.9479	72.1776	GZMK;BTN2A2;GSTP1;GZMA
chromatin assembly (GO:0031497)	1965-09-01	0.0020285	0.999995	0	0	3.53034	21.8898	HIST1H2BN;HIST1H2BM;HIST1H4A;HIST1H2BO;HIST1H3A;HIST1H2BH;TP53;HIST1H2BA;HIST1H2BD
interferon-gamma-mediated signaling pathway (GO:0060333)	1970-09-01	0.00339904	0.999995	0	0	3.24012	18.4177	HFE;TRIM26;HLA-A;TRIM38;HLA-F;TRIM31;HLA-G;HLA-DPA1;HLA-E
nucleosome assembly (GO:0006334)	1960-08-01	0.00449335	0.999995	0	0	3.37629	18.2494	HIST1H2BN;HIST1H2BM;HIST1H4A;HIST1H2BO;HIST1H3A;HIST1H2BH;HIST1H2BA;HIST1H2BD
protein-DNA complex assembly (GO:0065004)	1991-10-01	0.00648391	0.999995	0	0	2.71149	13.6617	HIST1H2BN;HIST1H2BM;HIST1H4A;CDK7;HIST1H2BO;HIST1H3A;HIST1H2BH;HIST1H2BA;GTF2H4;HIST1H2BD
antigen processing and presentation of peptide antigen via MHC class I (GO:0002474)	2021-05-28	0.00679706	0.999995	0	0	4.76167	23.7667	HFE;HLA-A;HLA-F;HLA-G;HLA-E
negative regulation of defense response to virus (GO:0050687)	2021-03-11	0.0106438	0.999995	0	0	8.20152	37.2577	TSPAN6;PCBP2;MICB
regulation of DNA-dependent DNA replication (GO:0090329)	2021-03-12	0.013735	0.999995	0	0	7.28986	31.2575	GMNN;WRNIP1;BMP6
regulation of cytokine production (GO:0001817)	10/108	0.0202188	0.999995	0	0	2.23913	8.73517	CD83;BTN2A2;BTN3A1;MOG;BTN2A1;BTN1A1;BTN3A3;BTN3A2;TNF;BTN2A3P
nucleosome organization (GO:0034728)	1979-08-01	0.0222571	0.999995	0	0	2.47032	9.39978	HIST1H2BN;HIST1H2BM;HIST1H4A;HIST1H2BO;HIST1H3A;HIST1H2BH;HIST1H2BA;HIST1H2BD
regulation of apoptotic signaling pathway (GO:2001233)	2021-04-25	0.0222831	0.999995	0	0	4.16778	15.854	CYLD;QARS;TRIM39;RPS3
regulation of microtubule-based process (GO:0032886)	2021-04-26	0.0254455	0.999995	0	0	3.97813	14.6046	ATAT1;CYLD;PHLDB1;ERBB2
transmembrane receptor protein tyrosine phosphatase signaling pathway (GO:0007185)	2021-02-06	0.0256106	0.999995	0	0	10.9251	40.0379	TRIO;PTPRF
cellular response to iron ion (GO:0071281)	2021-02-06	0.0256106	0.999995	0	0	10.9251	40.0379	HFE;BMP6
spinal cord motor neuron differentiation (GO:0021522)	2021-02-06	0.0256106	0.999995	0	0	10.9251	40.0379	ISL1;SOX4
negative regulation of stress-activated protein kinase signaling cascade (GO:0070303)	2021-02-06	0.0256106	0.999995	0	0	10.9251	40.0379	QARS;GSTP1
regulation of NFAT protein import into nucleus (GO:0051532)	2021-02-06	0.0256106	0.999995	0	0	10.9251	40.0379	DYRK2;TNF
cellular response to interferon-gamma (GO:0071346)	10/116	0.0313125	0.999995	0	0	2.06927	7.16741	HFE;TRIM26;HLA-A;TRIM38;HLA-F;TRIM31;HLA-G;AIF1;HLA-E;HLA-DPA1
regulation of NIK/NF-kappaB signaling (GO:1901222)	2021-04-28	0.0325419	0.999995	0	0	3.64624	12.4892	TRIM40;TSPAN6;RPS3;TNF
death-inducing signaling complex assembly (GO:0071550)	2021-02-07	0.0348247	0.999995	0	0	8.73966	29.3428	RIPK1;TNF
cell differentiation in spinal cord (GO:0021515)	2021-02-07	0.0348247	0.999995	0	0	8.73966	29.3428	ISL1;SOX4
positive regulation of response to biotic stimulus (GO:0002833)	2021-03-17	0.036092	0.999995	0	0	4.68511	15.5625	LY86;TRIM15;BMP6
regulation of lipopolysaccharide-mediated signaling pathway (GO:0031664)	2021-03-18	0.041937	0.999995	0	0	4.37254	13.8679	NFKBIL1;LY86;BMP6
protein tetramerization (GO:0051262)	1990-08-01	0.0437525	0.999995	0	0	2.1377	6.68929	HIST1H4A;ALDH5A1;HIST1H3A;HM13;ACOT13;SOD2;TP53;S100A10
regulation of endodeoxyribonuclease activity (GO:0032071)	2021-02-08	0.045104	0.999995	0	0	7.28267	22.5674	GZMA;RPS3
regulation of receptor binding (GO:1900120)	2021-02-08	0.045104	0.999995	0	0	7.28267	22.5674	HFE;PTPRF
succinate metabolic process (GO:0006105)	2021-02-08	0.045104	0.999995	0	0	7.28267	22.5674	GHR;ALDH5A1
regulation of cytokine secretion (GO:0050707)	1931-04-01	0.045147	0.999995	0	0	3.24059	10.0388	PTGER4;PPP1R11;BTN2A2;TNF
protein heterotetramerization (GO:0051290)	2021-03-19	0.0482251	0.999995	0	0	4.09904	12.4278	HIST1H4A;HIST1H3A;S100A10
mitochondrial electron transport, NADH to ubiquinone (GO:0006120)	1946-05-01	0.0499245	0.999995	0	0	2.66866	7.99863	NDUFB9;NDUFA7;NDUFS6;NDUFS4;NDUFC2
negative regulation of NIK/NF-kappaB signaling (GO:1901223)	2021-02-09	0.0563376	0.999995	0	0	6.24196	17.9543	TRIM40;TSPAN6
negative regulation of natural killer cell mediated cytotoxicity (GO:0045953)	2021-02-09	0.0563376	0.999995	0	0	6.24196	17.9543	MICA;HLA-E
T cell mediated immunity (GO:0002456)	2021-02-09	0.0563376	0.999995	0	0	6.24196	17.9543	BTN3A3;BTN3A2
mesodermal cell differentiation (GO:0048333)	2021-02-09	0.0563376	0.999995	0	0	6.24196	17.9543	ITGB4;ITGA2
regulation of JUN kinase activity (GO:0043506)	1934-04-01	0.0601075	0.999995	0	0	2.91607	8.1989	EDN1;GSTP1;RPS3;TNF
NADH dehydrogenase complex assembly (GO:0010257)	1964-06-01	0.061053	0.999995	0	0	2.26434	6.33113	NDUFB9;NDUFA7;NDUFS6;NDUFS4;NDUFAF2;NDUFC2
mitochondrial respiratory chain complex I biogenesis (GO:0097031)	1964-06-01	0.061053	0.999995	0	0	2.26434	6.33113	NDUFB9;NDUFA7;NDUFS6;NDUFS4;NDUFAF2;NDUFC2
mitochondrial respiratory chain complex I assembly (GO:0032981)	1964-06-01	0.061053	0.999995	0	0	2.26434	6.33113	NDUFB9;NDUFA7;NDUFS6;NDUFS4;NDUFAF2;NDUFC2
positive regulation of protein secretion (GO:0050714)	1982-07-01	0.0680741	0.999995	0	0	2.04346	5.49111	UNC13B;PTGER4;TNF;ISL1;SOX4;BMP6;HLA-E
low-density lipoprotein particle receptor catabolic process (GO:0032802)	2021-02-10	0.0684222	0.999995	0	0	5.46143	14.6479	MYLIP;AP2B1
cellular response to growth hormone stimulus (GO:0071378)	2021-02-10	0.0684222	0.999995	0	0	5.46143	14.6479	GHR;PIK3R1
insulin-like growth factor receptor signaling pathway (GO:0048009)	2021-02-10	0.0684222	0.999995	0	0	5.46143	14.6479	GHR;PIK3R1
DNA replication-dependent nucleosome assembly (GO:0006335)	2021-02-10	0.0684222	0.999995	0	0	5.46143	14.6479	HIST1H4A;HIST1H3A
DNA replication-dependent nucleosome organization (GO:0034723)	2021-02-10	0.0684222	0.999995	0	0	5.46143	14.6479	HIST1H4A;HIST1H3A
positive regulation of execution phase of apoptosis (GO:1900119)	2021-02-10	0.0684222	0.999995	0	0	5.46143	14.6479	RPS3;TP53
negative regulation of transcription factor import into nucleus (GO:0042992)	2021-03-23	0.0775713	0.999995	0	0	3.27855	8.3818	CYLD;DYRK2;NFKBIL1
regulation of microtubule cytoskeleton organization (GO:0070507)	2021-03-23	0.0775713	0.999995	0	0	3.27855	8.3818	ATAT1;CYLD;PHLDB1
atrial septum morphogenesis (GO:0060413)	2021-02-11	0.0812619	0.999995	0	0	4.85435	12.1848	ISL1;SOX4
regulation of histone deacetylation (GO:0031063)	2021-02-11	0.0812619	0.999995	0	0	4.85435	12.1848	NIPBL;TP53
immune response-regulating cell surface receptor signaling pathway (GO:0002768)	2021-02-11	0.0812619	0.999995	0	0	4.85435	12.1848	HLA-G;MICB
negative regulation of protein ubiquitination involved in ubiquitin-dependent protein catabolic process (GO:2000059)	2021-02-11	0.0812619	0.999995	0	0	4.85435	12.1848	TRIM39;HFE
chromatin silencing at rDNA (GO:0000183)	2021-02-11	0.0812619	0.999995	0	0	4.85435	12.1848	HIST1H4A;HIST1H3A
cell-substrate junction assembly (GO:0007044)	2021-02-11	0.0812619	0.999995	0	0	4.85435	12.1848	CD151;ITGB4
positive regulation of protein deacetylation (GO:0090312)	2021-02-11	0.0812619	0.999995	0	0	4.85435	12.1848	NIPBL;TP53
positive regulation of histone deacetylation (GO:0031065)	2021-02-11	0.0812619	0.999995	0	0	4.85435	12.1848	NIPBL;TP53
lymphocyte mediated immunity (GO:0002449)	2021-02-11	0.0812619	0.999995	0	0	4.85435	12.1848	BTN3A3;BTN3A2
negative regulation of receptor binding (GO:1900121)	2021-02-11	0.0812619	0.999995	0	0	4.85435	12.1848	HFE;PTPRF
positive regulation of heterotypic cell-cell adhesion (GO:0034116)	2021-02-11	0.0812619	0.999995	0	0	4.85435	12.1848	GCNT2;TNF
low-density lipoprotein receptor particle metabolic process (GO:0032799)	2021-02-11	0.0812619	0.999995	0	0	4.85435	12.1848	MYLIP;AP2B1
hemidesmosome assembly (GO:0031581)	2021-02-11	0.0812619	0.999995	0	0	4.85435	12.1848	CD151;ITGB4
cytoplasmic translation (GO:0002181)	1954-05-01	0.087084	0.999995	0	0	2.23203	5.44811	RPL18A;RPLP0;RPS3;RPL18;RPL17-C18ORF32
negative regulation of gene expression, epigenetic (GO:0045814)	2021-03-25	0.0945584	0.999995	0	0	2.98019	7.02888	HIST1H4A;HIST1H3A;JARID2
regulation of viral release from host cell (GO:1902186)	2021-03-25	0.0945584	0.999995	0	0	2.98019	7.02888	TRIM26;TRIM15;TRIM31
negative regulation of locomotion (GO:0040013)	2021-03-25	0.0945584	0.999995	0	0	2.98019	7.02888	TRIM26;TRIM15;SPINT2
cardiac right ventricle morphogenesis (GO:0003215)	2021-02-12	0.0947673	0.999995	0	0	4.36869	10.2941	ISL1;SOX4
regulation of nitric-oxide synthase biosynthetic process (GO:0051769)	2021-02-12	0.0947673	0.999995	0	0	4.36869	10.2941	EDN1;GSTP1
positive regulation of establishment of protein localization (GO:1904951)	2021-02-12	0.0947673	0.999995	0	0	4.36869	10.2941	TNF;CCT5
negative regulation of oxidoreductase activity (GO:0051354)	2021-02-12	0.0947673	0.999995	0	0	4.36869	10.2941	GZMK;GZMA
negative regulation of cytokine secretion (GO:0050710)	1940-04-01	0.0968238	0.999995	0	0	2.4293	5.67208	PTGER4;PPP1R11;BTN2A2;TNF
regulation of viral entry into host cell (GO:0046596)	2021-03-26	0.103573	0.999995	0	0	2.85046	6.46336	TRIM26;TRIM38;TRIM31
T cell receptor signaling pathway (GO:0050852)	11/163	0.1036	0.999995	0	0	1.58534	3.59431	PSMD7;BTN2A2;BTN3A1;MOG;BTN2A1;BTN1A1;BTN3A3;PIK3R1;BTN3A2;BTN2A3P;HLA-DPA1
protein homotetramerization (GO:0051289)	1957-05-01	0.103914	0.999995	0	0	2.10292	4.76143	ALDH5A1;HM13;ACOT13;SOD2;TP53
response to iron ion (GO:0010039)	2021-02-13	0.108855	0.999995	0	0	3.97132	8.80734	HFE;BMP6
regulation of interleukin-1 beta production (GO:0032651)	2021-02-13	0.108855	0.999995	0	0	3.97132	8.80734	GSTP1;ISL1
negative regulation of viral release from host cell (GO:1902187)	2021-02-13	0.108855	0.999995	0	0	3.97132	8.80734	TRIM26;TRIM15
regulation of oxidoreductase activity (GO:0051341)	2021-02-13	0.108855	0.999995	0	0	3.97132	8.80734	GZMK;GZMA
antigen processing and presentation of exogenous peptide antigen via MHC class I, TAP-dependent (GO:0002479)	1975-06-01	0.11075	0.999995	0	0	1.90226	4.18588	PSMD7;HFE;HLA-A;HLA-F;HLA-G;HLA-E
positive regulation of substrate adhesion-dependent cell spreading (GO:1900026)	2021-03-27	0.112912	0.999995	0	0	2.73155	5.95792	CIB1;RREB1;S100A10
respiratory electron transport chain (GO:0022904)	1994-07-01	0.118569	0.999995	0	0	1.7605	3.75383	NDUFB9;NDUFA7;ALDH5A1;NDUFS6;COX4I1;NDUFS4;NDUFC2
transcription elongation from RNA polymerase I promoter (GO:0006362)	2021-03-28	0.122556	0.999995	0	0	2.62215	5.50438	CDK7;ZNRD1;GTF2H4
necroptotic process (GO:0070266)	2021-02-14	0.12345	0.999995	0	0	3.64019	7.615	CYLD;RIPK1
adaptive immune response based on somatic recombination of immune receptors built from immunoglobulin superfamily domains (GO:0002460)	2021-02-14	0.12345	0.999995	0	0	3.64019	7.615	BTN3A3;BTN3A2
epiboly involved in wound healing (GO:0090505)	2021-02-14	0.12345	0.999995	0	0	3.64019	7.615	DDR1;CD151
antigen processing and presentation of exogenous peptide antigen via MHC class I (GO:0042590)	1978-06-01	0.127061	0.999995	0	0	1.82271	3.76041	PSMD7;HFE;HLA-A;HLA-F;HLA-G;HLA-E
regulation of tumor necrosis factor production (GO:0032680)	1961-05-01	0.128637	0.999995	0	0	1.95231	4.00372	NFKBIL1;GSTP1;RIPK1;ISL1;HLA-E
response to X-ray (GO:0010165)	2021-02-15	0.138478	0.999995	0	0	3.36	6.64286	NIPBL;TP53
mitotic chromosome condensation (GO:0007076)	2021-02-15	0.138478	0.999995	0	0	3.36	6.64286	NIPBL;PAPD7
positive regulation of acute inflammatory response (GO:0002675)	2021-02-15	0.138478	0.999995	0	0	3.36	6.64286	OSMR;TNF
negative regulation of viral entry into host cell (GO:0046597)	2021-02-15	0.138478	0.999995	0	0	3.36	6.64286	TRIM26;TRIM31
negative regulation of cytokine production involved in immune response (GO:0002719)	2021-02-15	0.138478	0.999995	0	0	3.36	6.64286	HFE;TNF
regulation of immune response (GO:0050776)	15/251	0.1401	0.999995	0	0	1.39263	2.73707	BTN3A1;MOG;BTN2A2;BTN2A1;HFE;BTN1A1;BTN3A3;HLA-A;BTN3A2;HLA-F;HLA-G;HLA-E;BTN2A3P;MICA;MICB
phosphatidylinositol 3-kinase signaling (GO:0014065)	2021-03-30	0.142688	0.999995	0	0	2.42766	4.72688	EDN1;ERBB2;PIK3R1
termination of RNA polymerase I transcription (GO:0006363)	2021-03-31	0.153139	0.999995	0	0	2.34084	4.39237	CDK7;ZNRD1;GTF2H4
protein deacylation (GO:0035601)	2021-02-16	0.153875	0.999995	0	0	3.11984	5.83913	LYPLA2;SIRT5
regulation of bicellular tight junction assembly (GO:2000810)	2021-02-16	0.153875	0.999995	0	0	3.11984	5.83913	OCLN;TNF
negative regulation of DNA replication (GO:0008156)	2021-02-16	0.153875	0.999995	0	0	3.11984	5.83913	GMNN;RAD17
genitalia development (GO:0048806)	2021-02-16	0.153875	0.999995	0	0	3.11984	5.83913	FOXF2;SRD5A1
programmed necrotic cell death (GO:0097300)	2021-02-16	0.153875	0.999995	0	0	3.11984	5.83913	CYLD;RIPK1
cellular response to type I interferon (GO:0071357)	1965-05-01	0.155755	0.999995	0	0	1.82177	3.38753	HFE;HLA-A;HLA-F;HLA-G;HLA-E
type I interferon signaling pathway (GO:0060337)	1965-05-01	0.155755	0.999995	0	0	1.82177	3.38753	HFE;HLA-A;HLA-F;HLA-G;HLA-E
positive regulation of tumor necrosis factor superfamily cytokine production (GO:1903557)	1932-03-01	0.163822	0.999995	0	0	2.26	4.08829	RIPK1;ISL1;HLA-E
protein heterooligomerization (GO:0051291)	1949-04-01	0.166674	0.999995	0	0	1.94252	3.48045	HIST1H4A;HIST1H3A;RIPK1;S100A10
mitochondrial ATP synthesis coupled electron transport (GO:0042775)	1985-06-01	0.169237	0.999995	0	0	1.6606	2.94998	NDUFB9;NDUFA7;NDUFS6;COX4I1;NDUFS4;NDUFC2
positive regulation of transcription initiation from RNA polymerase II promoter (GO:0060261)	2021-02-17	0.16958	0.999995	0	0	2.9117	5.16661	SUB1;TP53
2-oxoglutarate metabolic process (GO:0006103)	2021-02-17	0.16958	0.999995	0	0	2.9117	5.16661	GHR;MRPS36
DNA packaging (GO:0006323)	2021-02-17	0.16958	0.999995	0	0	2.9117	5.16661	NIPBL;TP53
positive regulation of hormone secretion (GO:0046887)	2021-02-17	0.16958	0.999995	0	0	2.9117	5.16661	EDN1;HFE
negative regulation of phosphoprotein phosphatase activity (GO:0032515)	2021-02-17	0.16958	0.999995	0	0	2.9117	5.16661	PPP1R11;TNF
transcription initiation from RNA polymerase I promoter (GO:0006361)	1933-03-01	0.174718	0.999995	0	0	2.18455	3.81113	CDK7;ZNRD1;GTF2H4
transcription from RNA polymerase I promoter (GO:0006360)	1933-03-01	0.174718	0.999995	0	0	2.18455	3.81113	CDK7;ZNRD1;GTF2H4
cellular glucose homeostasis (GO:0001678)	1933-03-01	0.174718	0.999995	0	0	2.18455	3.81113	UNC13B;PIK3R1;SOX4
positive regulation of JUN kinase activity (GO:0043507)	1950-04-01	0.175335	0.999995	0	0	1.90019	3.30834	EDN1;RPS3;RIPK1;TNF
negative regulation of protein ubiquitination (GO:0031397)	1950-04-01	0.175335	0.999995	0	0	1.90019	3.30834	TRIM39;HFE;RPS3;SOX4
negative regulation of fibroblast proliferation (GO:0048147)	2021-02-18	0.185535	0.999995	0	0	2.72957	4.598	GSTP1;TP53
tRNA metabolic process (GO:0006399)	2021-02-18	0.185535	0.999995	0	0	2.72957	4.598	RPP21;FARS2
negative regulation of cellular metabolic process (GO:0031324)	1934-03-01	0.185809	0.999995	0	0	2.11397	3.55789	EDN1;BTN2A2;SIRT5
positive regulation of peptide secretion (GO:0002793)	1935-03-01	0.197078	0.999995	0	0	2.0478	3.32595	UNC13B;HFE;BMP6
negative regulation of lymphocyte activation (GO:0051250)	2021-02-19	0.201689	0.999995	0	0	2.56887	4.11284	LST1;MICA
histone methylation (GO:0016571)	2021-02-19	0.201689	0.999995	0	0	2.56887	4.11284	FBL;PRMT2
negative regulation of proteolysis involved in cellular protein catabolic process (GO:1903051)	2021-02-19	0.201689	0.999995	0	0	2.56887	4.11284	TRIM39;HFE
regulation of heterotypic cell-cell adhesion (GO:0034114)	2021-02-19	0.201689	0.999995	0	0	2.56887	4.11284	GCNT2;TNF
positive regulation of mononuclear cell migration (GO:0071677)	2021-02-19	0.201689	0.999995	0	0	2.56887	4.11284	TNF;AIF1
negative regulation of response to biotic stimulus (GO:0002832)	2021-02-19	0.201689	0.999995	0	0	2.56887	4.11284	NFKBIL1;PCBP2
positive regulation of oxidoreductase activity (GO:0051353)	2021-02-19	0.201689	0.999995	0	0	2.56887	4.11284	EDN1;TNF
cellular response to interleukin-7 (GO:0098761)	2021-02-19	0.201689	0.999995	0	0	2.56887	4.11284	HIST1H3A;IL7R
interleukin-7-mediated signaling pathway (GO:0038111)	2021-02-19	0.201689	0.999995	0	0	2.56887	4.11284	HIST1H3A;IL7R
mesoderm formation (GO:0001707)	2021-02-20	0.217994	0.999995	0	0	2.42603	3.69555	ITGB4;ITGA2
negative regulation of macromolecule biosynthetic process (GO:0010558)	2021-02-20	0.217994	0.999995	0	0	2.42603	3.69555	EDN1;GSTP1
wound healing, spreading of cells (GO:0044319)	2021-02-20	0.217994	0.999995	0	0	2.42603	3.69555	DDR1;CD151
embryonic digestive tract development (GO:0048566)	2021-02-20	0.217994	0.999995	0	0	2.42603	3.69555	NIPBL;TNF
intrinsic apoptotic signaling pathway in response to DNA damage by p53 class mediator (GO:0042771)	2021-02-20	0.217994	0.999995	0	0	2.42603	3.69555	DYRK2;TP53
growth hormone receptor signaling pathway (GO:0060396)	2021-02-20	0.217994	0.999995	0	0	2.42603	3.69555	GHR;PIK3R1
translation (GO:0006412)	13/232	0.219988	0.999995	0	0	1.29879	1.9666	NDUFA7;MRPS36;RPLP0;MRPS18B;TARS;RPL17-C18ORF32;FARS2;RPL18A;QARS;RPS3;RPL18;PELO;ABCF1
positive regulation of smooth muscle cell proliferation (GO:0048661)	1937-03-01	0.220078	0.999995	0	0	1.92714	2.91726	EDN1;TNF;AIF1
positive regulation of multi-organism process (GO:0043902)	1937-03-01	0.220078	0.999995	0	0	1.92714	2.91726	LY86;TRIM15;BMP6
regulation of gene expression, epigenetic (GO:0040029)	1974-05-01	0.22404	0.999995	0	0	1.5834	2.36865	HIST1H4A;ZNRD1;HIST1H3A;KDM1B;JARID2
regulation of tumor necrosis factor-mediated signaling pathway (GO:0010803)	1956-04-01	0.230142	0.999995	0	0	1.68041	2.46862	CYLD;GSTP1;RIPK1;TNF
cobalamin metabolic process (GO:0009235)	2021-02-21	0.234405	0.999995	0	0	2.29823	3.33404	MTRR;CD320
positive regulation of leukocyte cell-cell adhesion (GO:1903039)	2021-02-21	0.234405	0.999995	0	0	2.29823	3.33404	TNF;HLA-DPA1
cellular response to hexose stimulus (GO:0071331)	2021-02-21	0.234405	0.999995	0	0	2.29823	3.33404	UNC13B;SOX4
cellular protein complex localization (GO:0034629)	2021-02-21	0.234405	0.999995	0	0	2.29823	3.33404	CEP72;EXOC3
tetrapyrrole metabolic process (GO:0033013)	2021-02-21	0.234405	0.999995	0	0	2.29823	3.33404	MTRR;CD320
protein O-linked glycosylation via threonine (GO:0018243)	2021-02-21	0.234405	0.999995	0	0	2.29823	3.33404	GALNT4;POC1B-GALNT4
protein repair (GO:0030091)	2021-01-06	0.235915	0.999995	0	0	4.36484	6.30406	PCMT1
regulation of fat cell proliferation (GO:0070344)	2021-01-06	0.235915	0.999995	0	0	4.36484	6.30406	E2F3
polyamine biosynthetic process (GO:0006596)	2021-01-06	0.235915	0.999995	0	0	4.36484	6.30406	SAT1
response to chemokine (GO:1990868)	2021-01-06	0.235915	0.999995	0	0	4.36484	6.30406	FOXC1
regulation of endothelial cell development (GO:1901550)	2021-01-06	0.235915	0.999995	0	0	4.36484	6.30406	TNF
cellular response to chemokine (GO:1990869)	2021-01-06	0.235915	0.999995	0	0	4.36484	6.30406	FOXC1
mesodermal cell fate commitment (GO:0001710)	2021-01-06	0.235915	0.999995	0	0	4.36484	6.30406	TRIM15
galactosylceramide metabolic process (GO:0006681)	2021-01-06	0.235915	0.999995	0	0	4.36484	6.30406	ALDH5A1
SCF complex assembly (GO:0010265)	2021-01-06	0.235915	0.999995	0	0	4.36484	6.30406	FBXL7
peripheral nervous system neuron development (GO:0048935)	2021-01-06	0.235915	0.999995	0	0	4.36484	6.30406	ISL1
negative regulation of acute inflammatory response (GO:0002674)	2021-01-06	0.235915	0.999995	0	0	4.36484	6.30406	GSTP1
regulation of T cell tolerance induction (GO:0002664)	2021-01-06	0.235915	0.999995	0	0	4.36484	6.30406	HLA-G
regulation of thymocyte apoptotic process (GO:0070243)	2021-01-06	0.235915	0.999995	0	0	4.36484	6.30406	TP53
positive regulation of receptor binding (GO:1900122)	2021-01-06	0.235915	0.999995	0	0	4.36484	6.30406	HFE
positive regulation of podosome assembly (GO:0071803)	2021-01-06	0.235915	0.999995	0	0	4.36484	6.30406	TNF
bundle of His cell-Purkinje myocyte adhesion involved in cell communication (GO:0086073)	2021-01-06	0.235915	0.999995	0	0	4.36484	6.30406	DSP
cardiac ventricle formation (GO:0003211)	2021-01-06	0.235915	0.999995	0	0	4.36484	6.30406	SOX4
iron ion import (GO:0097286)	2021-01-06	0.235915	0.999995	0	0	4.36484	6.30406	HFE
ear development (GO:0043583)	2021-01-06	0.235915	0.999995	0	0	4.36484	6.30406	NIPBL
male genitalia development (GO:0030539)	2021-01-06	0.235915	0.999995	0	0	4.36484	6.30406	SRD5A1
glomerular epithelial cell differentiation (GO:0072311)	2021-01-06	0.235915	0.999995	0	0	4.36484	6.30406	BASP1
renal filtration cell differentiation (GO:0061318)	2021-01-06	0.235915	0.999995	0	0	4.36484	6.30406	BASP1
iron ion import across plasma membrane (GO:0098711)	2021-01-06	0.235915	0.999995	0	0	4.36484	6.30406	HFE
regulation of wound healing, spreading of epidermal cells (GO:1903689)	2021-01-06	0.235915	0.999995	0	0	4.36484	6.30406	RREB1
phosphorylation of RNA polymerase II C-terminal domain (GO:0070816)	2021-01-06	0.235915	0.999995	0	0	4.36484	6.30406	GTF2H4
oxygen homeostasis (GO:0032364)	2021-01-06	0.235915	0.999995	0	0	4.36484	6.30406	SOD2
spermine metabolic process (GO:0008215)	2021-01-06	0.235915	0.999995	0	0	4.36484	6.30406	SAT1
membrane raft assembly (GO:0001765)	2021-01-06	0.235915	0.999995	0	0	4.36484	6.30406	S100A10
immune response-inhibiting cell surface receptor signaling pathway (GO:0002767)	2021-01-06	0.235915	0.999995	0	0	4.36484	6.30406	HLA-G
glandular epithelial cell development (GO:0002068)	2021-01-06	0.235915	0.999995	0	0	4.36484	6.30406	BMP6
citrate metabolic process (GO:0006101)	2021-01-06	0.235915	0.999995	0	0	4.36484	6.30406	GHR
antigen processing and presentation of endogenous peptide antigen (GO:0002483)	2021-01-06	0.235915	0.999995	0	0	4.36484	6.30406	HLA-E
negative regulation of vasculature development (GO:1901343)	2021-01-06	0.235915	0.999995	0	0	4.36484	6.30406	FOXC1
lymphoid progenitor cell differentiation (GO:0002320)	2021-01-06	0.235915	0.999995	0	0	4.36484	6.30406	SOX4
alpha-beta T cell activation (GO:0046631)	2021-01-06	0.235915	0.999995	0	0	4.36484	6.30406	HLA-E
negative regulation of cellular extravasation (GO:0002692)	2021-01-06	0.235915	0.999995	0	0	4.36484	6.30406	PTGER4
regulation of chemokine-mediated signaling pathway (GO:0070099)	2021-01-06	0.235915	0.999995	0	0	4.36484	6.30406	EDN1
trigeminal nerve development (GO:0021559)	2021-01-06	0.235915	0.999995	0	0	4.36484	6.30406	ISL1
type B pancreatic cell development (GO:0003323)	2021-01-06	0.235915	0.999995	0	0	4.36484	6.30406	BMP6
regulation of mitotic spindle checkpoint (GO:1903504)	2021-01-06	0.235915	0.999995	0	0	4.36484	6.30406	CCNB1
dosage compensation by inactivation of X chromosome (GO:0009048)	2021-01-06	0.235915	0.999995	0	0	4.36484	6.30406	CDYL
regulation of aldosterone biosynthetic process (GO:0032347)	2021-01-06	0.235915	0.999995	0	0	4.36484	6.30406	BMP6
ventricular compact myocardium morphogenesis (GO:0003223)	2021-01-06	0.235915	0.999995	0	0	4.36484	6.30406	DSP
negative regulation of systemic arterial blood pressure (GO:0003085)	2021-01-06	0.235915	0.999995	0	0	4.36484	6.30406	SOD2
lipoprotein catabolic process (GO:0042159)	2021-01-06	0.235915	0.999995	0	0	4.36484	6.30406	LYPLA2
negative regulation of DNA repair (GO:0045738)	2021-01-06	0.235915	0.999995	0	0	4.36484	6.30406	RPS3
regulation of biosynthetic process (GO:0009889)	2021-01-06	0.235915	0.999995	0	0	4.36484	6.30406	GSTP1
positive regulation of fever generation (GO:0031622)	2021-01-06	0.235915	0.999995	0	0	4.36484	6.30406	TNF
positive regulation of oxidative stress-induced cell death (GO:1903209)	2021-01-06	0.235915	0.999995	0	0	4.36484	6.30406	RIPK1
peptidyl-serine autophosphorylation (GO:0036289)	2021-01-06	0.235915	0.999995	0	0	4.36484	6.30406	RIPK1
regulation of sarcomere organization (GO:0060297)	2021-01-06	0.235915	0.999995	0	0	4.36484	6.30406	EDN1
glutamate catabolic process (GO:0006538)	2021-01-06	0.235915	0.999995	0	0	4.36484	6.30406	ALDH5A1
L-amino acid import (GO:0043092)	2021-01-06	0.235915	0.999995	0	0	4.36484	6.30406	SLC1A3
I-kappaB kinase/NF-kappaB signaling (GO:0007249)	1957-04-01	0.239669	0.999995	0	0	1.64862	2.35505	NKIRAS2;NFKBIL1;RIPK1;TNF
positive regulation of apoptotic signaling pathway (GO:2001235)	1976-05-01	0.240306	0.999995	0	0	1.53864	2.19385	CYLD;TRIM39;RPS3;RIPK1;TP53
cellular response to oxidative stress (GO:0034599)	7/115	0.240435	0.999995	0	0	1.41661	2.01911	GSTP1;GPX5;GPX8;SOD2;TP53;PRDX6;TXN2
positive regulation of peptide hormone secretion (GO:0090277)	1939-03-01	0.24358	0.999995	0	0	1.81989	2.57025	HFE;ISL1;SOX4
positive regulation of reactive oxygen species metabolic process (GO:2000379)	1939-03-01	0.24358	0.999995	0	0	1.81989	2.57025	GSTP1;RIPK1;TP53
positive regulation of protein targeting to membrane (GO:0090314)	2021-02-22	0.250883	0.999995	0	0	2.1832	3.01886	ERBB2;CIB1
negative regulation of myeloid cell differentiation (GO:0045638)	2021-02-22	0.250883	0.999995	0	0	2.1832	3.01886	HIST1H4A;CIB1
rRNA modification (GO:0000154)	2021-02-22	0.250883	0.999995	0	0	2.1832	3.01886	NOP56;FBL
STAT cascade (GO:0097696)	2021-02-22	0.250883	0.999995	0	0	2.1832	3.01886	GHR;IL31RA
protein O-linked glycosylation via serine (GO:0018242)	2021-02-22	0.250883	0.999995	0	0	2.1832	3.01886	GALNT4;POC1B-GALNT4
positive regulation of RNA splicing (GO:0033120)	2021-02-22	0.250883	0.999995	0	0	2.1832	3.01886	PIK3R1;PRDX6
digestive system development (GO:0055123)	2021-02-22	0.250883	0.999995	0	0	2.1832	3.01886	NIPBL;ITGB4
mitochondrial respiratory chain complex assembly (GO:0033108)	1997-06-01	0.252484	0.999995	0	0	1.44071	1.983	NDUFB9;NDUFA7;NDUFS6;NDUFS4;NDUFAF2;NDUFC2
tRNA aminoacylation (GO:0043039)	1940-03-01	0.255479	0.999995	0	0	1.77061	2.4162	QARS;TARS;FARS2
dicarboxylic acid metabolic process (GO:0043648)	1959-04-01	0.258981	0.999995	0	0	1.5885	2.14607	GHR;MTRR;ALDH5A1;MRPS36
chromosome condensation (GO:0030261)	2021-02-23	0.267388	0.999995	0	0	2.07913	2.74248	NIPBL;PAPD7
metanephros development (GO:0001656)	2021-02-23	0.267388	0.999995	0	0	2.07913	2.74248	NIPBL;BASP1
positive regulation of monooxygenase activity (GO:0032770)	2021-02-23	0.267388	0.999995	0	0	2.07913	2.74248	NPR3;TNF
mesenchymal cell differentiation (GO:0048762)	1941-03-01	0.267456	0.999995	0	0	1.72393	2.27351	FOXC1;FOXF2;ISL1
regulation of substrate adhesion-dependent cell spreading (GO:1900024)	1941-03-01	0.267456	0.999995	0	0	1.72393	2.27351	CIB1;RREB1;S100A10
positive regulation of multicellular organism growth (GO:0040018)	2021-01-07	0.26943	0.999995	0	0	3.63718	4.76996	GHR
histone H3-K4 demethylation (GO:0034720)	2021-01-07	0.26943	0.999995	0	0	3.63718	4.76996	KDM1B
cardiac muscle cell-cardiac muscle cell adhesion (GO:0086042)	2021-01-07	0.26943	0.999995	0	0	3.63718	4.76996	DSP
smooth muscle cell migration (GO:0014909)	2021-01-07	0.26943	0.999995	0	0	3.63718	4.76996	DDR1
coenzyme A biosynthetic process (GO:0015937)	2021-01-07	0.26943	0.999995	0	0	3.63718	4.76996	PPCS
regulation of interleukin-13 production (GO:0032656)	2021-01-07	0.26943	0.999995	0	0	3.63718	4.76996	HLA-E
regulation of myosin-light-chain-phosphatase activity (GO:0035507)	2021-01-07	0.26943	0.999995	0	0	3.63718	4.76996	TNF
positive regulation of lamellipodium morphogenesis (GO:2000394)	2021-01-07	0.26943	0.999995	0	0	3.63718	4.76996	RREB1
positive regulation of sphingolipid biosynthetic process (GO:0090154)	2021-01-07	0.26943	0.999995	0	0	3.63718	4.76996	TNF
regulation of monocyte chemotactic protein-1 production (GO:0071637)	2021-01-07	0.26943	0.999995	0	0	3.63718	4.76996	GSTP1
positive regulation of calcineurin-NFAT signaling cascade (GO:0070886)	2021-01-07	0.26943	0.999995	0	0	3.63718	4.76996	CIB1
regulation of extracellular matrix organization (GO:1903053)	2021-01-07	0.26943	0.999995	0	0	3.63718	4.76996	DDR1
positive regulation of histone H3-K9 methylation (GO:0051574)	2021-01-07	0.26943	0.999995	0	0	3.63718	4.76996	JARID2
oxaloacetate metabolic process (GO:0006107)	2021-01-07	0.26943	0.999995	0	0	3.63718	4.76996	GHR
mitral valve development (GO:0003174)	2021-01-07	0.26943	0.999995	0	0	3.63718	4.76996	SOX4
ribonucleoside bisphosphate biosynthetic process (GO:0034030)	2021-01-07	0.26943	0.999995	0	0	3.63718	4.76996	PPCS
sulfur amino acid biosynthetic process (GO:0000097)	2021-01-07	0.26943	0.999995	0	0	3.63718	4.76996	MTRR
glycoside catabolic process (GO:0016139)	2021-01-07	0.26943	0.999995	0	0	3.63718	4.76996	ABHD10
reproductive system development (GO:0061458)	2021-01-07	0.26943	0.999995	0	0	3.63718	4.76996	SRD5A1
valine metabolic process (GO:0006573)	2021-01-07	0.26943	0.999995	0	0	3.63718	4.76996	GHR
regulation of chemokine biosynthetic process (GO:0045073)	2021-01-07	0.26943	0.999995	0	0	3.63718	4.76996	TNF
gas homeostasis (GO:0033483)	2021-01-07	0.26943	0.999995	0	0	3.63718	4.76996	SOD2
activation of MAPKKK activity (GO:0000185)	2021-01-07	0.26943	0.999995	0	0	3.63718	4.76996	TNF
L-cysteine metabolic process (GO:0046439)	2021-01-07	0.26943	0.999995	0	0	3.63718	4.76996	MTRR
vascular endothelial growth factor signaling pathway (GO:0038084)	2021-01-07	0.26943	0.999995	0	0	3.63718	4.76996	FOXC1
glycosylceramide metabolic process (GO:0006677)	2021-01-07	0.26943	0.999995	0	0	3.63718	4.76996	ALDH5A1
positive regulation of urine volume (GO:0035810)	2021-01-07	0.26943	0.999995	0	0	3.63718	4.76996	NPR3
regulation of vitamin D biosynthetic process (GO:0060556)	2021-01-07	0.26943	0.999995	0	0	3.63718	4.76996	TNF
negative regulation of macrophage activation (GO:0043031)	2021-01-07	0.26943	0.999995	0	0	3.63718	4.76996	IL31RA
positive regulation of hemopoiesis (GO:1903708)	2021-01-07	0.26943	0.999995	0	0	3.63718	4.76996	FOXC1
regulation of dendritic cell differentiation (GO:2001198)	2021-01-07	0.26943	0.999995	0	0	3.63718	4.76996	HLA-G
negative regulation of T cell mediated immunity (GO:0002710)	2021-01-07	0.26943	0.999995	0	0	3.63718	4.76996	HFE
positive regulation of RIG-I signaling pathway (GO:1900246)	2021-01-07	0.26943	0.999995	0	0	3.63718	4.76996	TRIM15
negative regulation of alpha-beta T cell activation (GO:0046636)	2021-01-07	0.26943	0.999995	0	0	3.63718	4.76996	HFE
female genitalia development (GO:0030540)	2021-01-07	0.26943	0.999995	0	0	3.63718	4.76996	SRD5A1
endonucleolytic cleavage in ITS1 to separate SSU-rRNA from 5.8S rRNA and LSU-rRNA from tricistronic rRNA transcript (SSU-rRNA, 5.8S rRNA, LSU-rRNA) (GO:0000447)	2021-01-07	0.26943	0.999995	0	0	3.63718	4.76996	ABT1
negative regulation of transporter activity (GO:0032410)	2021-01-07	0.26943	0.999995	0	0	3.63718	4.76996	NDFIP1
positive regulation of ceramide biosynthetic process (GO:2000304)	2021-01-07	0.26943	0.999995	0	0	3.63718	4.76996	TNF
vascular smooth muscle contraction (GO:0014829)	2021-01-07	0.26943	0.999995	0	0	3.63718	4.76996	EDN1
pentose metabolic process (GO:0019321)	2021-01-07	0.26943	0.999995	0	0	3.63718	4.76996	PHACTR1
noradrenergic neuron differentiation (GO:0003357)	2021-01-07	0.26943	0.999995	0	0	3.63718	4.76996	SOX4
purine nucleoside bisphosphate biosynthetic process (GO:0034033)	2021-01-07	0.26943	0.999995	0	0	3.63718	4.76996	PPCS
regulation of calcidiol 1-monooxygenase activity (GO:0060558)	2021-01-07	0.26943	0.999995	0	0	3.63718	4.76996	TNF
negative regulation of T cell cytokine production (GO:0002725)	2021-01-07	0.26943	0.999995	0	0	3.63718	4.76996	HFE
cleavage furrow formation (GO:0036089)	2021-01-07	0.26943	0.999995	0	0	3.63718	4.76996	SNX18
sensory organ morphogenesis (GO:0090596)	2021-01-07	0.26943	0.999995	0	0	3.63718	4.76996	NIPBL
regulation of protein localization to centrosome (GO:1904779)	2021-01-07	0.26943	0.999995	0	0	3.63718	4.76996	CEP72
spermidine metabolic process (GO:0008216)	2021-01-07	0.26943	0.999995	0	0	3.63718	4.76996	SAT1
amino acid import across plasma membrane (GO:0089718)	2021-01-07	0.26943	0.999995	0	0	3.63718	4.76996	SLC1A3
neuron fate specification (GO:0048665)	2021-01-07	0.26943	0.999995	0	0	3.63718	4.76996	ISL1
ER overload response (GO:0006983)	2021-01-07	0.26943	0.999995	0	0	3.63718	4.76996	TP53
microglial cell activation (GO:0001774)	2021-01-07	0.26943	0.999995	0	0	3.63718	4.76996	AIF1
negative regulation of viral life cycle (GO:1903901)	1961-04-01	0.278582	0.999995	0	0	1.53261	1.95874	TRIM26;TRIM15;TRIM31;TNF
negative regulation of protein secretion (GO:0050709)	1942-03-01	0.279496	0.999995	0	0	1.67963	2.14114	PTGER4;PPP1R11;BTN2A2
response to glucocorticoid (GO:0051384)	2021-02-24	0.283889	0.999995	0	0	1.98452	2.49885	ISL1;TNF
receptor catabolic process (GO:0032801)	2021-02-24	0.283889	0.999995	0	0	1.98452	2.49885	MYLIP;AP2B1
negative regulation of T cell proliferation (GO:0042130)	2021-02-24	0.283889	0.999995	0	0	1.98452	2.49885	BTN2A2;HLA-G
cellular protein catabolic process (GO:0044257)	1962-04-01	0.28847	0.999995	0	0	1.5061	1.87233	MYLIP;GZMA;RIPK1;AP2B1
negative regulation of DNA metabolic process (GO:0051053)	1943-03-01	0.291584	0.999995	0	0	1.63756	2.01817	GMNN;RPS3;RAD17
positive regulation of protein localization to plasma membrane (GO:1903078)	1943-03-01	0.291584	0.999995	0	0	1.63756	2.01817	CIB1;PIK3R1;NKD2
digestive tract development (GO:0048565)	1943-03-01	0.291584	0.999995	0	0	1.63756	2.01817	NIPBL;ITGB4;TNF
regulation of protein ubiquitination involved in ubiquitin-dependent protein catabolic process (GO:2000058)	2021-02-25	0.300352	0.999995	0	0	1.89814	2.28308	TRIM39;HFE
positive regulation of interleukin-12 production (GO:0032735)	2021-02-25	0.300352	0.999995	0	0	1.89814	2.28308	ISL1;HLA-G
cellular response to epidermal growth factor stimulus (GO:0071364)	2021-02-25	0.300352	0.999995	0	0	1.89814	2.28308	FOXC1;ERBB2
regulation of cellular protein localization (GO:1903827)	2021-02-25	0.300352	0.999995	0	0	1.89814	2.28308	HFE;CEP72
positive regulation of nitric oxide biosynthetic process (GO:0045429)	2021-02-25	0.300352	0.999995	0	0	1.89814	2.28308	EDN1;TNF
positive regulation of nitric oxide metabolic process (GO:1904407)	2021-02-25	0.300352	0.999995	0	0	1.89814	2.28308	EDN1;TNF
regulation of DNA methylation (GO:0044030)	2021-01-08	0.301477	0.999995	0	0	3.11742	3.73797	KDM1B
exocyst localization (GO:0051601)	2021-01-08	0.301477	0.999995	0	0	3.11742	3.73797	EXOC3
regulation of stress-activated protein kinase signaling cascade (GO:0070302)	2021-01-08	0.301477	0.999995	0	0	3.11742	3.73797	GSTP1
positive regulation of smooth muscle cell apoptotic process (GO:0034393)	2021-01-08	0.301477	0.999995	0	0	3.11742	3.73797	E2F3
positive regulation of macrophage differentiation (GO:0045651)	2021-01-08	0.301477	0.999995	0	0	3.11742	3.73797	RIPK1
positive regulation of extracellular matrix assembly (GO:1901203)	2021-01-08	0.301477	0.999995	0	0	3.11742	3.73797	PHLDB1
stress-induced premature senescence (GO:0090400)	2021-01-08	0.301477	0.999995	0	0	3.11742	3.73797	TP53
cellular response to prostaglandin E stimulus (GO:0071380)	2021-01-08	0.301477	0.999995	0	0	3.11742	3.73797	PTGER4
sulfur amino acid catabolic process (GO:0000098)	2021-01-08	0.301477	0.999995	0	0	3.11742	3.73797	MTRR
cellular response to forskolin (GO:1904322)	2021-01-08	0.301477	0.999995	0	0	3.11742	3.73797	ADCY2
negative regulation of interleukin-1 production (GO:0032692)	2021-01-08	0.301477	0.999995	0	0	3.11742	3.73797	GSTP1
positive regulation of protein localization to Cajal body (GO:1904871)	2021-01-08	0.301477	0.999995	0	0	3.11742	3.73797	CCT5
negative regulation of leukocyte mediated cytotoxicity (GO:0001911)	2021-01-08	0.301477	0.999995	0	0	3.11742	3.73797	MICA
amyloid fibril formation (GO:1990000)	2021-01-08	0.301477	0.999995	0	0	3.11742	3.73797	RIPK1
peptidyl-arginine methylation, to asymmetrical-dimethyl arginine (GO:0019919)	2021-01-08	0.301477	0.999995	0	0	3.11742	3.73797	PRMT2
positive regulation of interleukin-8 biosynthetic process (GO:0045416)	2021-01-08	0.301477	0.999995	0	0	3.11742	3.73797	TNF
positive regulation of steroid biosynthetic process (GO:0010893)	2021-01-08	0.301477	0.999995	0	0	3.11742	3.73797	TNF
positive regulation of chromatin binding (GO:0035563)	2021-01-08	0.301477	0.999995	0	0	3.11742	3.73797	GMNN
negative regulation of activated T cell proliferation (GO:0046007)	2021-01-08	0.301477	0.999995	0	0	3.11742	3.73797	BTN2A2
positive regulation of DNA recombination (GO:0045911)	2021-01-08	0.301477	0.999995	0	0	3.11742	3.73797	PRDM9
desmosome organization (GO:0002934)	2021-01-08	0.301477	0.999995	0	0	3.11742	3.73797	DSP
positive regulation of RNA polymerase II transcriptional preinitiation complex assembly (GO:0045899)	2021-01-08	0.301477	0.999995	0	0	3.11742	3.73797	TP53
negative regulation of protein complex disassembly (GO:0043242)	2021-01-08	0.301477	0.999995	0	0	3.11742	3.73797	TNF
response to forskolin (GO:1904321)	2021-01-08	0.301477	0.999995	0	0	3.11742	3.73797	ADCY2
bundle of His cell to Purkinje myocyte communication (GO:0086069)	2021-01-08	0.301477	0.999995	0	0	3.11742	3.73797	DSP
regulation of striated muscle cell differentiation (GO:0051153)	2021-01-08	0.301477	0.999995	0	0	3.11742	3.73797	RBM24
positive regulation of protein localization to cell surface (GO:2000010)	2021-01-08	0.301477	0.999995	0	0	3.11742	3.73797	TNF
positive regulation of metanephros development (GO:0072216)	2021-01-08	0.301477	0.999995	0	0	3.11742	3.73797	BASP1
genetic imprinting (GO:0071514)	2021-01-08	0.301477	0.999995	0	0	3.11742	3.73797	KDM1B
negative regulation of biosynthetic process (GO:0009890)	2021-01-08	0.301477	0.999995	0	0	3.11742	3.73797	GSTP1
negative regulation of establishment of protein localization (GO:1904950)	2021-01-08	0.301477	0.999995	0	0	3.11742	3.73797	NDFIP1
positive regulation of regulatory T cell differentiation (GO:0045591)	2021-01-08	0.301477	0.999995	0	0	3.11742	3.73797	HLA-G
establishment of protein localization to chromatin (GO:0071169)	2021-01-08	0.301477	0.999995	0	0	3.11742	3.73797	NIPBL
norepinephrine metabolic process (GO:0042415)	2021-01-08	0.301477	0.999995	0	0	3.11742	3.73797	RNF180
regulation of protein localization to Cajal body (GO:1904869)	2021-01-08	0.301477	0.999995	0	0	3.11742	3.73797	CCT5
positive regulation of viral entry into host cell (GO:0046598)	2021-01-08	0.301477	0.999995	0	0	3.11742	3.73797	TRIM38
snoRNA 3'-end processing (GO:0031126)	2021-01-08	0.301477	0.999995	0	0	3.11742	3.73797	FBL
ribosome disassembly (GO:0032790)	2021-01-08	0.301477	0.999995	0	0	3.11742	3.73797	PELO
immunoglobulin mediated immune response (GO:0016064)	2021-01-08	0.301477	0.999995	0	0	3.11742	3.73797	GAPT
negative regulation of telomerase activity (GO:0051974)	2021-01-08	0.301477	0.999995	0	0	3.11742	3.73797	TP53
endochondral ossification (GO:0001958)	2021-01-08	0.301477	0.999995	0	0	3.11742	3.73797	FOXC1
kidney mesenchyme development (GO:0072074)	2021-01-08	0.301477	0.999995	0	0	3.11742	3.73797	BASP1
regulation of smooth muscle cell proliferation (GO:0048660)	1944-03-01	0.303707	0.999995	0	0	1.59753	1.90377	EDN1;TNF;AIF1
positive regulation of transport (GO:0051050)	1944-03-01	0.303707	0.999995	0	0	1.59753	1.90377	CD63;CD151;TNF
positive regulation of endocytosis (GO:0045807)	1964-04-01	0.308382	0.999995	0	0	1.45575	1.71256	CD63;CD151;HFE;TNF
response to growth factor (GO:0070848)	2021-02-26	0.31675	0.999995	0	0	1.81895	2.09114	ERBB2;CIB1
regulation of NF-kappaB import into nucleus (GO:0042345)	2021-02-26	0.31675	0.999995	0	0	1.81895	2.09114	CYLD;TNF
negative regulation of catalytic activity (GO:0043086)	2021-02-26	0.31675	0.999995	0	0	1.81895	2.09114	GZMK;GZMA
internal peptidyl-lysine acetylation (GO:0018393)	2021-02-26	0.31675	0.999995	0	0	1.81895	2.09114	ATAT1;MORF4L2
regulation of G1/S transition of mitotic cell cycle (GO:2000045)	1946-03-01	0.328002	0.999995	0	0	1.52307	1.69782	PRMT2;AIF1;TMEM14B
positive regulation of protein localization to cell periphery (GO:1904377)	1946-03-01	0.328002	0.999995	0	0	1.52307	1.69782	CIB1;PIK3R1;NKD2
tRNA aminoacylation for protein translation (GO:0006418)	1946-03-01	0.328002	0.999995	0	0	1.52307	1.69782	QARS;TARS;FARS2
regulation of fibroblast proliferation (GO:0048145)	1946-03-01	0.328002	0.999995	0	0	1.52307	1.69782	GSTP1;NDUFS4;TP53
regulation of DNA metabolic process (GO:0051052)	1946-03-01	0.328002	0.999995	0	0	1.52307	1.69782	KDM1B;UBE2V2;IL7R
type B pancreatic cell differentiation (GO:0003309)	2021-01-09	0.33212	0.999995	0	0	2.7276	3.00652	BMP6
inositol metabolic process (GO:0006020)	2021-01-09	0.33212	0.999995	0	0	2.7276	3.00652	ITPK1
regulation of immunoglobulin secretion (GO:0051023)	2021-01-09	0.33212	0.999995	0	0	2.7276	3.00652	HLA-E
removal of superoxide radicals (GO:0019430)	2021-01-09	0.33212	0.999995	0	0	2.7276	3.00652	SOD2
acidic amino acid transport (GO:0015800)	2021-01-09	0.33212	0.999995	0	0	2.7276	3.00652	SLC1A3
positive regulation of protein maturation (GO:1903319)	2021-01-09	0.33212	0.999995	0	0	2.7276	3.00652	NKD2
short-chain fatty acid metabolic process (GO:0046459)	2021-01-09	0.33212	0.999995	0	0	2.7276	3.00652	ALDH5A1
vasodilation (GO:0042311)	2021-01-09	0.33212	0.999995	0	0	2.7276	3.00652	SOD2
embryonic digestive tract morphogenesis (GO:0048557)	2021-01-09	0.33212	0.999995	0	0	2.7276	3.00652	NIPBL
homocysteine metabolic process (GO:0050667)	2021-01-09	0.33212	0.999995	0	0	2.7276	3.00652	MTRR
embryonic forelimb morphogenesis (GO:0035115)	2021-01-09	0.33212	0.999995	0	0	2.7276	3.00652	NIPBL
positive regulation of immunoglobulin secretion (GO:0051024)	2021-01-09	0.33212	0.999995	0	0	2.7276	3.00652	HLA-E
peptidyl-arginine omega-N-methylation (GO:0035247)	2021-01-09	0.33212	0.999995	0	0	2.7276	3.00652	PRMT2
regulation of integrin activation (GO:0033623)	2021-01-09	0.33212	0.999995	0	0	2.7276	3.00652	PTGER4
regulation of endoplasmic reticulum unfolded protein response (GO:1900101)	2021-01-09	0.33212	0.999995	0	0	2.7276	3.00652	PIK3R1
endosome to pigment granule transport (GO:0043485)	2021-01-09	0.33212	0.999995	0	0	2.7276	3.00652	CD63
columnar/cuboidal epithelial cell differentiation (GO:0002065)	2021-01-09	0.33212	0.999995	0	0	2.7276	3.00652	SOX4
negative regulation of histone methylation (GO:0031061)	2021-01-09	0.33212	0.999995	0	0	2.7276	3.00652	JARID2
regulation of cytokine secretion involved in immune response (GO:0002739)	2021-01-09	0.33212	0.999995	0	0	2.7276	3.00652	TNF
positive regulation of epidermis development (GO:0045684)	2021-01-09	0.33212	0.999995	0	0	2.7276	3.00652	FST
positive regulation of establishment of protein localization to telomere (GO:1904851)	2021-01-09	0.33212	0.999995	0	0	2.7276	3.00652	CCT5
negative regulation of activin receptor signaling pathway (GO:0032926)	2021-01-09	0.33212	0.999995	0	0	2.7276	3.00652	FST
peptidyl-arginine methylation (GO:0018216)	2021-01-09	0.33212	0.999995	0	0	2.7276	3.00652	PRMT2
mitotic DNA replication checkpoint (GO:0033314)	2021-01-09	0.33212	0.999995	0	0	2.7276	3.00652	RAD17
oogenesis (GO:0048477)	2021-01-09	0.33212	0.999995	0	0	2.7276	3.00652	TRIP13
positive regulation of ribosome biogenesis (GO:0090070)	2021-01-09	0.33212	0.999995	0	0	2.7276	3.00652	RIOK1
regulation of natural killer cell activation (GO:0032814)	2021-01-09	0.33212	0.999995	0	0	2.7276	3.00652	MICA
positive regulation of rRNA processing (GO:2000234)	2021-01-09	0.33212	0.999995	0	0	2.7276	3.00652	RIOK1
cellular response to superoxide (GO:0071451)	2021-01-09	0.33212	0.999995	0	0	2.7276	3.00652	SOD2
toll-like receptor 3 signaling pathway (GO:0034138)	2021-01-09	0.33212	0.999995	0	0	2.7276	3.00652	RIPK1
regulation of hair cycle (GO:0042634)	2021-01-09	0.33212	0.999995	0	0	2.7276	3.00652	NIPBL
B cell homeostasis (GO:0001782)	2021-01-09	0.33212	0.999995	0	0	2.7276	3.00652	GAPT
negative regulation of lipid localization (GO:1905953)	2021-01-09	0.33212	0.999995	0	0	2.7276	3.00652	TNF
regulation of helicase activity (GO:0051095)	2021-01-09	0.33212	0.999995	0	0	2.7276	3.00652	TP53
endosome to melanosome transport (GO:0035646)	2021-01-09	0.33212	0.999995	0	0	2.7276	3.00652	CD63
mitral valve morphogenesis (GO:0003183)	2021-01-09	0.33212	0.999995	0	0	2.7276	3.00652	SOX4
negative regulation of DNA-templated transcription, elongation (GO:0032785)	2021-01-09	0.33212	0.999995	0	0	2.7276	3.00652	SUPT4H1
regulation of protein transport (GO:0051223)	2021-02-27	0.333057	0.999995	0	0	1.7461	1.91974	NDFIP1;TNF
regulation of protein targeting to membrane (GO:0090313)	2021-02-27	0.333057	0.999995	0	0	1.7461	1.91974	ERBB2;CIB1
regulation of protein localization to cell surface (GO:2000008)	2021-02-27	0.333057	0.999995	0	0	1.7461	1.91974	HFE;TNF
cellular response to glucose stimulus (GO:0071333)	2021-02-27	0.333057	0.999995	0	0	1.7461	1.91974	UNC13B;SOX4
nucleotide-excision repair (GO:0006289)	6/108	0.336567	0.999995	0	0	1.2846	1.39887	CDK7;GTF2H2C;PAPD7;UBE2V2;TP53;GTF2H4
negative regulation of I-kappaB kinase/NF-kappaB signaling (GO:0043124)	1947-03-01	0.34015	0.999995	0	0	1.48838	1.60502	CYLD;GSTP1;RIPK1
positive regulation of tumor necrosis factor production (GO:0032760)	1947-03-01	0.34015	0.999995	0	0	1.48838	1.60502	RIPK1;ISL1;HLA-E
positive regulation of gene expression, epigenetic (GO:0045815)	1947-03-01	0.34015	0.999995	0	0	1.48838	1.60502	HIST1H4A;HIST1H3A;ZNRD1
positive regulation of protein complex assembly (GO:0031334)	1988-05-01	0.34286	0.999995	0	0	1.31535	1.408	UNC13B;RPS3;TNF;TP53;GTF2H4
cellular response to ketone (GO:1901655)	2021-02-28	0.34925	0.999995	0	0	1.67886	1.7661	PTGER4;ADCY2
positive regulation of extrinsic apoptotic signaling pathway (GO:2001238)	2021-02-28	0.34925	0.999995	0	0	1.67886	1.7661	CYLD;RIPK1
positive regulation of cell communication (GO:0010647)	2021-02-28	0.34925	0.999995	0	0	1.67886	1.7661	EDN1;CLSTN1
bicellular tight junction assembly (GO:0070830)	2021-02-28	0.34925	0.999995	0	0	1.67886	1.7661	OCLN;MARVELD2
negative regulation of cytokine production (GO:0001818)	6/110	0.352261	0.999995	0	0	1.25976	1.31441	PTGER4;CYLD;BTN2A2;PPP1R11;PCBP2;TNF
peptide biosynthetic process (GO:0043043)	9/174	0.354499	0.999995	0	0	1.19133	1.23547	RPL18A;MRPS36;RPLP0;MRPS18B;RPS3;TARS;RPL18;PELO;ABCF1
cell-matrix adhesion (GO:0007160)	1990-05-01	0.360397	0.999995	0	0	1.28427	1.31066	DDR1;CD63;ITGB4;ITGA2;ITGA1
negative regulation of viral-induced cytoplasmic pattern recognition receptor signaling pathway (GO:0039532)	2021-01-10	0.361419	0.999995	0	0	2.4244	2.46736	TSPAN6
membrane raft organization (GO:0031579)	2021-01-10	0.361419	0.999995	0	0	2.4244	2.46736	S100A10
male meiosis I (GO:0007141)	2021-01-10	0.361419	0.999995	0	0	2.4244	2.46736	DDX4
regulation of sequestering of zinc ion (GO:0061088)	2021-01-10	0.361419	0.999995	0	0	2.4244	2.46736	SLC30A5
positive regulation of transcription from RNA polymerase III promoter (GO:0045945)	2021-01-10	0.361419	0.999995	0	0	2.4244	2.46736	ERBB2
regulation of mammary gland epithelial cell proliferation (GO:0033599)	2021-01-10	0.361419	0.999995	0	0	2.4244	2.46736	RREB1
regulation of attachment of spindle microtubules to kinetochore (GO:0051988)	2021-01-10	0.361419	0.999995	0	0	2.4244	2.46736	CCNB1
positive regulation of alcohol biosynthetic process (GO:1902932)	2021-01-10	0.361419	0.999995	0	0	2.4244	2.46736	TNF
contractile actin filament bundle assembly (GO:0030038)	2021-01-10	0.361419	0.999995	0	0	2.4244	2.46736	PHACTR1
L-glutamate transport (GO:0015813)	2021-01-10	0.361419	0.999995	0	0	2.4244	2.46736	SLC1A3
muscle cell migration (GO:0014812)	2021-01-10	0.361419	0.999995	0	0	2.4244	2.46736	DDR1
aspartate family amino acid metabolic process (GO:0009066)	2021-01-10	0.361419	0.999995	0	0	2.4244	2.46736	MTRR
positive regulation of glucose import in response to insulin stimulus (GO:2001275)	2021-01-10	0.361419	0.999995	0	0	2.4244	2.46736	PIK3R1
glutamine metabolic process (GO:0006541)	2021-01-10	0.361419	0.999995	0	0	2.4244	2.46736	ALDH5A1
mesenchymal to epithelial transition (GO:0060231)	2021-01-10	0.361419	0.999995	0	0	2.4244	2.46736	BASP1
neuroepithelial cell differentiation (GO:0060563)	2021-01-10	0.361419	0.999995	0	0	2.4244	2.46736	SOX4
positive regulation of cardiac muscle cell differentiation (GO:2000727)	2021-01-10	0.361419	0.999995	0	0	2.4244	2.46736	EDN1
creatine metabolic process (GO:0006600)	2021-01-10	0.361419	0.999995	0	0	2.4244	2.46736	GHR
androgen biosynthetic process (GO:0006702)	2021-01-10	0.361419	0.999995	0	0	2.4244	2.46736	SRD5A1
mitotic G1 DNA damage checkpoint (GO:0031571)	2021-01-10	0.361419	0.999995	0	0	2.4244	2.46736	TP53
regulation of urine volume (GO:0035809)	2021-01-10	0.361419	0.999995	0	0	2.4244	2.46736	NPR3
glycerolipid metabolic process (GO:0046486)	2021-01-10	0.361419	0.999995	0	0	2.4244	2.46736	ALDH5A1
positive regulation of T cell apoptotic process (GO:0070234)	2021-01-10	0.361419	0.999995	0	0	2.4244	2.46736	TP53
G1 DNA damage checkpoint (GO:0044783)	2021-01-10	0.361419	0.999995	0	0	2.4244	2.46736	TP53
regulation of establishment of protein localization to telomere (GO:0070203)	2021-01-10	0.361419	0.999995	0	0	2.4244	2.46736	CCT5
negative regulation of lipopolysaccharide-mediated signaling pathway (GO:0031665)	2021-01-10	0.361419	0.999995	0	0	2.4244	2.46736	NFKBIL1
positive regulation of T cell receptor signaling pathway (GO:0050862)	2021-01-10	0.361419	0.999995	0	0	2.4244	2.46736	RPS3
IRES-dependent viral translational initiation (GO:0075522)	2021-01-10	0.361419	0.999995	0	0	2.4244	2.46736	PCBP2
positive regulation of smooth muscle cell migration (GO:0014911)	2021-01-10	0.361419	0.999995	0	0	2.4244	2.46736	AIF1
regulation of gene expression by genetic imprinting (GO:0006349)	2021-01-10	0.361419	0.999995	0	0	2.4244	2.46736	KDM1B
regulation of podosome assembly (GO:0071801)	2021-01-10	0.361419	0.999995	0	0	2.4244	2.46736	TNF
negative regulation of intracellular estrogen receptor signaling pathway (GO:0033147)	2021-01-10	0.361419	0.999995	0	0	2.4244	2.46736	ISL1
coenzyme A metabolic process (GO:0015936)	2021-01-10	0.361419	0.999995	0	0	2.4244	2.46736	PPCS
stress fiber assembly (GO:0043149)	2021-01-10	0.361419	0.999995	0	0	2.4244	2.46736	PHACTR1
positive regulation of interleukin-13 production (GO:0032736)	2021-01-10	0.361419	0.999995	0	0	2.4244	2.46736	HLA-E
mitotic G1/S transition checkpoint (GO:0044819)	2021-01-10	0.361419	0.999995	0	0	2.4244	2.46736	TP53
positive regulation of mRNA splicing, via spliceosome (GO:0048026)	2021-01-10	0.361419	0.999995	0	0	2.4244	2.46736	PRDX6
quinone metabolic process (GO:1901661)	2021-01-10	0.361419	0.999995	0	0	2.4244	2.46736	CRYZL1
regulation of phospholipid metabolic process (GO:1903725)	2021-01-10	0.361419	0.999995	0	0	2.4244	2.46736	PIK3R1
forelimb morphogenesis (GO:0035136)	2021-01-10	0.361419	0.999995	0	0	2.4244	2.46736	NIPBL
regulation of reactive oxygen species metabolic process (GO:2000377)	1949-03-01	0.364387	0.999995	0	0	1.42352	1.43709	SIRT5;RIPK1;TP53
regulation of megakaryocyte differentiation (GO:0045652)	1949-03-01	0.364387	0.999995	0	0	1.42352	1.43709	HIST1H4A;HIST1H3A;CIB1
nucleotide-excision repair, preincision complex assembly (GO:0006294)	2029-02-01	0.365306	0.999995	0	0	1.61659	1.62794	CDK7;GTF2H4
protein alkylation (GO:0008213)	2029-02-01	0.365306	0.999995	0	0	1.61659	1.62794	PCMT1;PRMT2
positive regulation of histone modification (GO:0031058)	2029-02-01	0.365306	0.999995	0	0	1.61659	1.62794	NIPBL;TP53
regulation of embryonic development (GO:0045995)	2029-02-01	0.365306	0.999995	0	0	1.61659	1.62794	PHLDB1;NIPBL
negative regulation of lymphocyte proliferation (GO:0050672)	2029-02-01	0.365306	0.999995	0	0	1.61659	1.62794	LST1;HLA-G
regulation of activated T cell proliferation (GO:0046006)	2029-02-01	0.365306	0.999995	0	0	1.61659	1.62794	BTN2A2;RPS3
negative regulation of stress-activated MAPK cascade (GO:0032873)	1930-02-01	0.381208	0.999995	0	0	1.55878	1.5033	QARS;GSTP1
regulation of developmental growth (GO:0048638)	1930-02-01	0.381208	0.999995	0	0	1.55878	1.5033	GHR;NIPBL
CENP-A containing nucleosome assembly (GO:0034080)	1930-02-01	0.381208	0.999995	0	0	1.55878	1.5033	HIST1H4A;CENPH
CENP-A containing chromatin organization (GO:0061641)	1930-02-01	0.381208	0.999995	0	0	1.55878	1.5033	HIST1H4A;CENPH
positive regulation of reactive oxygen species biosynthetic process (GO:1903428)	1930-02-01	0.381208	0.999995	0	0	1.55878	1.5033	EDN1;TNF
cell-cell junction organization (GO:0045216)	1972-04-01	0.388746	0.999995	0	0	1.28394	1.21311	CDH6;DSP;OCLN;MARVELD2
negative regulation of morphogenesis of an epithelium (GO:1905331)	2021-01-11	0.389435	0.999995	0	0	2.18185	2.05761	TNF
regulation of histone H3-K9 methylation (GO:0051570)	2021-01-11	0.389435	0.999995	0	0	2.18185	2.05761	JARID2
replicative senescence (GO:0090399)	2021-01-11	0.389435	0.999995	0	0	2.18185	2.05761	TP53
negative regulation of leukocyte activation (GO:0002695)	2021-01-11	0.389435	0.999995	0	0	2.18185	2.05761	IL31RA
negative regulation of blood vessel diameter (GO:0097756)	2021-01-11	0.389435	0.999995	0	0	2.18185	2.05761	EDN1
positive regulation of protein localization to chromosome, telomeric region (GO:1904816)	2021-01-11	0.389435	0.999995	0	0	2.18185	2.05761	CCT5
cellular response to prostaglandin stimulus (GO:0071379)	2021-01-11	0.389435	0.999995	0	0	2.18185	2.05761	PTGER4
regulation of lipid kinase activity (GO:0043550)	2021-01-11	0.389435	0.999995	0	0	2.18185	2.05761	PIK3R1
negative regulation of protein localization to nucleus (GO:1900181)	2021-01-11	0.389435	0.999995	0	0	2.18185	2.05761	TRIM40
mononuclear cell differentiation (GO:1903131)	2021-01-11	0.389435	0.999995	0	0	2.18185	2.05761	IL31RA
positive regulation of superoxide anion generation (GO:0032930)	2021-01-11	0.389435	0.999995	0	0	2.18185	2.05761	GSTP1
regulation of lamellipodium morphogenesis (GO:2000392)	2021-01-11	0.389435	0.999995	0	0	2.18185	2.05761	RREB1
regulation of hydrogen peroxide-induced cell death (GO:1903205)	2021-01-11	0.389435	0.999995	0	0	2.18185	2.05761	RIPK1
negative regulation of JUN kinase activity (GO:0043508)	2021-01-11	0.389435	0.999995	0	0	2.18185	2.05761	GSTP1
regulation of vascular endothelial growth factor signaling pathway (GO:1900746)	2021-01-11	0.389435	0.999995	0	0	2.18185	2.05761	CD63
T-helper cell differentiation (GO:0042093)	2021-01-11	0.389435	0.999995	0	0	2.18185	2.05761	PTGER4
pyrimidine nucleoside catabolic process (GO:0046135)	2021-01-11	0.389435	0.999995	0	0	2.18185	2.05761	NT5E
positive regulation of receptor biosynthetic process (GO:0010870)	2021-01-11	0.389435	0.999995	0	0	2.18185	2.05761	EDN1
endonucleolytic cleavage of tricistronic rRNA transcript (SSU-rRNA, 5.8S rRNA, LSU-rRNA) (GO:0000479)	2021-01-11	0.389435	0.999995	0	0	2.18185	2.05761	ABT1
activation of cysteine-type endopeptidase activity involved in apoptotic signaling pathway (GO:0097296)	2021-01-11	0.389435	0.999995	0	0	2.18185	2.05761	RIPK1
regulation of ventricular cardiac muscle cell action potential (GO:0098911)	2021-01-11	0.389435	0.999995	0	0	2.18185	2.05761	DSP
positive regulation of transcription from RNA polymerase II promoter in response to endoplasmic reticulum stress (GO:1990440)	2021-01-11	0.389435	0.999995	0	0	2.18185	2.05761	TP53
regulation of integrin-mediated signaling pathway (GO:2001044)	2021-01-11	0.389435	0.999995	0	0	2.18185	2.05761	CD63
monocyte differentiation (GO:0030224)	2021-01-11	0.389435	0.999995	0	0	2.18185	2.05761	IL31RA
T cell proliferation (GO:0042098)	2021-01-11	0.389435	0.999995	0	0	2.18185	2.05761	BTN3A1
positive regulation of chromosome segregation (GO:0051984)	2021-01-11	0.389435	0.999995	0	0	2.18185	2.05761	CCNB1
regulation of ceramide biosynthetic process (GO:2000303)	2021-01-11	0.389435	0.999995	0	0	2.18185	2.05761	TNF
negative regulation of cellular senescence (GO:2000773)	2021-01-11	0.389435	0.999995	0	0	2.18185	2.05761	ZKSCAN3
synaptonemal complex assembly (GO:0007130)	2021-01-11	0.389435	0.999995	0	0	2.18185	2.05761	TRIP13
regulation of chromatin binding (GO:0035561)	2021-01-11	0.389435	0.999995	0	0	2.18185	2.05761	GMNN
negative regulation of nucleocytoplasmic transport (GO:0046823)	2021-01-11	0.389435	0.999995	0	0	2.18185	2.05761	SOX4
macrophage differentiation (GO:0030225)	2021-01-11	0.389435	0.999995	0	0	2.18185	2.05761	IL31RA
regulation of RNA polymerase II transcriptional preinitiation complex assembly (GO:0045898)	2021-01-11	0.389435	0.999995	0	0	2.18185	2.05761	TP53
progesterone metabolic process (GO:0042448)	2021-01-11	0.389435	0.999995	0	0	2.18185	2.05761	SRD5A1
methionine metabolic process (GO:0006555)	2021-01-11	0.389435	0.999995	0	0	2.18185	2.05761	MTRR
metanephric mesenchyme development (GO:0072075)	2021-01-11	0.389435	0.999995	0	0	2.18185	2.05761	BASP1
negative regulation of chemotaxis (GO:0050922)	2021-01-11	0.389435	0.999995	0	0	2.18185	2.05761	AIF1
carbohydrate phosphorylation (GO:0046835)	2021-01-11	0.389435	0.999995	0	0	2.18185	2.05761	ITPK1
magnesium ion transport (GO:0015693)	2021-01-11	0.389435	0.999995	0	0	2.18185	2.05761	MRS2
aspartate family amino acid biosynthetic process (GO:0009067)	2021-01-11	0.389435	0.999995	0	0	2.18185	2.05761	MTRR
regulation of receptor biosynthetic process (GO:0010869)	2021-01-11	0.389435	0.999995	0	0	2.18185	2.05761	EDN1
response to corticosteroid (GO:0031960)	2021-01-11	0.389435	0.999995	0	0	2.18185	2.05761	TNF
synaptonemal complex organization (GO:0070193)	2021-01-11	0.389435	0.999995	0	0	2.18185	2.05761	TRIP13
spinal cord development (GO:0021510)	2021-01-11	0.389435	0.999995	0	0	2.18185	2.05761	SOX4
negative regulation of cell-cell adhesion (GO:0022408)	1931-02-01	0.396936	0.999995	0	0	1.50495	1.39054	SPINT2;MUC21
negative regulation of tumor necrosis factor superfamily cytokine production (GO:1903556)	1931-02-01	0.396936	0.999995	0	0	1.50495	1.39054	GSTP1;NFKBIL1
alpha-amino acid metabolic process (GO:1901605)	1931-02-01	0.396936	0.999995	0	0	1.50495	1.39054	GHR;MTRR
regulation of protein export from nucleus (GO:0046825)	1931-02-01	0.396936	0.999995	0	0	1.50495	1.39054	TP53;SOX4
positive regulation of insulin secretion (GO:0032024)	1931-02-01	0.396936	0.999995	0	0	1.50495	1.39054	ISL1;SOX4
positive regulation of cell-substrate adhesion (GO:0010811)	1952-03-01	0.400435	0.999995	0	0	1.33615	1.22285	CIB1;RREB1;S100A10
regulation of DNA binding (GO:0051101)	1952-03-01	0.400435	0.999995	0	0	1.33615	1.22285	FOXC1;GZMA;ID4
positive regulation of secretion by cell (GO:1903532)	1952-03-01	0.400435	0.999995	0	0	1.33615	1.22285	UNC13B;EDN1;BMP6
positive regulation of protein localization to membrane (GO:1905477)	1995-05-01	0.404266	0.999995	0	0	1.2126	1.09823	ERBB2;CIB1;PIK3R1;TP53;NKD2
nitrogen compound transport (GO:0071705)	1974-04-01	0.408742	0.999995	0	0	1.24713	1.11577	EDN1;SLC6A19;SLC6A18;CD320
protein deacetylation (GO:0006476)	1932-02-01	0.412477	0.999995	0	0	1.4547	1.28825	MORF4L2;SIRT5
7-methylguanosine mRNA capping (GO:0006370)	1932-02-01	0.412477	0.999995	0	0	1.4547	1.28825	CDK7;GTF2H4
central nervous system neuron differentiation (GO:0021953)	1932-02-01	0.412477	0.999995	0	0	1.4547	1.28825	ISL1;SOX4
chromatin remodeling at centromere (GO:0031055)	1932-02-01	0.412477	0.999995	0	0	1.4547	1.28825	HIST1H4A;CENPH
cyclic-nucleotide-mediated signaling (GO:0019935)	1932-02-01	0.412477	0.999995	0	0	1.4547	1.28825	NDUFS4;ADCY2
7-methylguanosine RNA capping (GO:0009452)	1932-02-01	0.412477	0.999995	0	0	1.4547	1.28825	CDK7;GTF2H4
activation of adenylate cyclase activity (GO:0007190)	1932-02-01	0.412477	0.999995	0	0	1.4547	1.28825	ADCY2;CAP2
regulation of cell-cell adhesion (GO:0022407)	1932-02-01	0.412477	0.999995	0	0	1.4547	1.28825	SPINT2;MUC21
negative regulation of fat cell differentiation (GO:0045599)	1932-02-01	0.412477	0.999995	0	0	1.4547	1.28825	TRIO;TNF
positive regulation of telomere maintenance via telomerase (GO:0032212)	1932-02-01	0.412477	0.999995	0	0	1.4547	1.28825	FBXO4;CCT5
positive regulation of transcription factor import into nucleus (GO:0042993)	1932-02-01	0.412477	0.999995	0	0	1.4547	1.28825	PIK3R1;TNF
regulation of nitric oxide biosynthetic process (GO:0045428)	1932-02-01	0.412477	0.999995	0	0	1.4547	1.28825	EDN1;TNF
positive regulation of myeloid leukocyte differentiation (GO:0002763)	1932-02-01	0.412477	0.999995	0	0	1.4547	1.28825	RIPK1;TNF
global genome nucleotide-excision repair (GO:0070911)	1932-02-01	0.412477	0.999995	0	0	1.4547	1.28825	UBE2V2;GTF2H4
positive regulation of interleukin-1 production (GO:0032732)	2021-01-12	0.416223	0.999995	0	0	1.9834	1.73851	ISL1
ribose phosphate metabolic process (GO:0019693)	2021-01-12	0.416223	0.999995	0	0	1.9834	1.73851	PHACTR1
regulation of viral life cycle (GO:1903900)	2021-01-12	0.416223	0.999995	0	0	1.9834	1.73851	TRIM31
pentose-phosphate shunt (GO:0006098)	2021-01-12	0.416223	0.999995	0	0	1.9834	1.73851	PHACTR1
vesicle budding from membrane (GO:0006900)	2021-01-12	0.416223	0.999995	0	0	1.9834	1.73851	S100A10
viral RNA genome replication (GO:0039694)	2021-01-12	0.416223	0.999995	0	0	1.9834	1.73851	PCBP2
endochondral bone morphogenesis (GO:0060350)	2021-01-12	0.416223	0.999995	0	0	1.9834	1.73851	FOXC1
histone arginine methylation (GO:0034969)	2021-01-12	0.416223	0.999995	0	0	1.9834	1.73851	PRMT2
regulation of actomyosin structure organization (GO:0110020)	2021-01-12	0.416223	0.999995	0	0	1.9834	1.73851	PTGER4
regulation of rRNA processing (GO:2000232)	2021-01-12	0.416223	0.999995	0	0	1.9834	1.73851	RIOK1
regulation of histone methylation (GO:0031060)	2021-01-12	0.416223	0.999995	0	0	1.9834	1.73851	JARID2
nucleoside catabolic process (GO:0009164)	2021-01-12	0.416223	0.999995	0	0	1.9834	1.73851	NT5E
positive regulation of keratinocyte differentiation (GO:0045618)	2021-01-12	0.416223	0.999995	0	0	1.9834	1.73851	FOXC1
polyamine metabolic process (GO:0006595)	2021-01-12	0.416223	0.999995	0	0	1.9834	1.73851	SAT1
phasic smooth muscle contraction (GO:0014821)	2021-01-12	0.416223	0.999995	0	0	1.9834	1.73851	EDN1
response to prostaglandin E (GO:0034695)	2021-01-12	0.416223	0.999995	0	0	1.9834	1.73851	PTGER4
regulation of interleukin-8 biosynthetic process (GO:0045414)	2021-01-12	0.416223	0.999995	0	0	1.9834	1.73851	TNF
regulation of establishment of endothelial barrier (GO:1903140)	2021-01-12	0.416223	0.999995	0	0	1.9834	1.73851	TNF
tRNA 5'-leader removal (GO:0001682)	2021-01-12	0.416223	0.999995	0	0	1.9834	1.73851	RPP21
vasoconstriction (GO:0042310)	2021-01-12	0.416223	0.999995	0	0	1.9834	1.73851	EDN1
kinetochore organization (GO:0051383)	2021-01-12	0.416223	0.999995	0	0	1.9834	1.73851	CENPH
regulation of mononuclear cell migration (GO:0071675)	2021-01-12	0.416223	0.999995	0	0	1.9834	1.73851	TNF
negative regulation of histone modification (GO:0031057)	2021-01-12	0.416223	0.999995	0	0	1.9834	1.73851	JARID2
positive regulation of DNA-dependent DNA replication (GO:2000105)	2021-01-12	0.416223	0.999995	0	0	1.9834	1.73851	BMP6
positive regulation of endoplasmic reticulum unfolded protein response (GO:1900103)	2021-01-12	0.416223	0.999995	0	0	1.9834	1.73851	PIK3R1
regulation of hormone secretion (GO:0046883)	2021-01-12	0.416223	0.999995	0	0	1.9834	1.73851	EDN1
positive regulation of stem cell differentiation (GO:2000738)	2021-01-12	0.416223	0.999995	0	0	1.9834	1.73851	FOXC1
positive regulation of neuron migration (GO:2001224)	2021-01-12	0.416223	0.999995	0	0	1.9834	1.73851	NIPBL
positive regulation of SMAD protein import into nucleus (GO:0060391)	2021-01-12	0.416223	0.999995	0	0	1.9834	1.73851	BMP6
positive regulation of granulocyte macrophage colony-stimulating factor production (GO:0032725)	2021-01-12	0.416223	0.999995	0	0	1.9834	1.73851	ISL1
positive regulation of adenylate cyclase activity (GO:0045762)	1933-02-01	0.427817	0.999995	0	0	1.40771	1.19523	ADCY2;CAP2
positive regulation of cell-cell adhesion (GO:0022409)	1933-02-01	0.427817	0.999995	0	0	1.40771	1.19523	GCNT2;TNF
oligosaccharide biosynthetic process (GO:0009312)	1933-02-01	0.427817	0.999995	0	0	1.40771	1.19523	GALNT4;POC1B-GALNT4
positive regulation of cell-matrix adhesion (GO:0001954)	1933-02-01	0.427817	0.999995	0	0	1.40771	1.19523	CIB1;S100A10
positive regulation of intrinsic apoptotic signaling pathway (GO:2001244)	1933-02-01	0.427817	0.999995	0	0	1.40771	1.19523	RPS3;TP53
negative regulation of multi-organism process (GO:0043901)	1933-02-01	0.427817	0.999995	0	0	1.40771	1.19523	NFKBIL1;PCBP2
regulation of interleukin-12 production (GO:0032655)	1933-02-01	0.427817	0.999995	0	0	1.40771	1.19523	ISL1;HLA-G
regulation of hematopoietic stem cell differentiation (GO:1902036)	1976-04-01	0.428602	0.999995	0	0	1.21236	1.02714	FOXC1;HIST1H4A;PSMD7;HIST1H3A
positive regulation of JNK cascade (GO:0046330)	1976-04-01	0.428602	0.999995	0	0	1.21236	1.02714	EDN1;RPS3;RIPK1;TNF
regulation of hematopoietic progenitor cell differentiation (GO:1901532)	1977-04-01	0.438467	0.999995	0	0	1.19569	0.98581	FOXC1;HIST1H4A;PSMD7;HIST1H3A
negative regulation of hemostasis (GO:1900047)	2021-01-13	0.441837	0.999995	0	0	1.81802	1.48498	EDN1
regulation of superoxide anion generation (GO:0032928)	2021-01-13	0.441837	0.999995	0	0	1.81802	1.48498	GSTP1
glycerolipid catabolic process (GO:0046503)	2021-01-13	0.441837	0.999995	0	0	1.81802	1.48498	PRDX6
DNA replication-independent nucleosome organization (GO:0034724)	2021-01-13	0.441837	0.999995	0	0	1.81802	1.48498	HIST1H4A
chromatin assembly or disassembly (GO:0006333)	2021-01-13	0.441837	0.999995	0	0	1.81802	1.48498	TP53
regulation of glucose import in response to insulin stimulus (GO:2001273)	2021-01-13	0.441837	0.999995	0	0	1.81802	1.48498	PIK3R1
viral translation (GO:0019081)	2021-01-13	0.441837	0.999995	0	0	1.81802	1.48498	PCBP2
positive regulation of glycogen biosynthetic process (GO:0045725)	2021-01-13	0.441837	0.999995	0	0	1.81802	1.48498	DYRK2
positive regulation of T cell mediated cytotoxicity (GO:0001916)	2021-01-13	0.441837	0.999995	0	0	1.81802	1.48498	HLA-E
tricarboxylic acid metabolic process (GO:0072350)	2021-01-13	0.441837	0.999995	0	0	1.81802	1.48498	GHR
DNA damage response, signal transduction by p53 class mediator resulting in transcription of p21 class mediator (GO:0006978)	2021-01-13	0.441837	0.999995	0	0	1.81802	1.48498	TP53
atrial septum development (GO:0003283)	2021-01-13	0.441837	0.999995	0	0	1.81802	1.48498	ISL1
regulation of axon guidance (GO:1902667)	2021-01-13	0.441837	0.999995	0	0	1.81802	1.48498	ZSWIM6
regulation of granulocyte macrophage colony-stimulating factor production (GO:0032645)	2021-01-13	0.441837	0.999995	0	0	1.81802	1.48498	ISL1
positive regulation of protein complex disassembly (GO:0043243)	2021-01-13	0.441837	0.999995	0	0	1.81802	1.48498	TNF
regulation of macrophage differentiation (GO:0045649)	2021-01-13	0.441837	0.999995	0	0	1.81802	1.48498	RIPK1
poly(A)+ mRNA export from nucleus (GO:0016973)	2021-01-13	0.441837	0.999995	0	0	1.81802	1.48498	PABPN1
B cell activation involved in immune response (GO:0002312)	2021-01-13	0.441837	0.999995	0	0	1.81802	1.48498	GAPT
regulation of execution phase of apoptosis (GO:1900117)	2021-01-13	0.441837	0.999995	0	0	1.81802	1.48498	TP53
neuron fate commitment (GO:0048663)	2021-01-13	0.441837	0.999995	0	0	1.81802	1.48498	ISL1
protein neddylation (GO:0045116)	2021-01-13	0.441837	0.999995	0	0	1.81802	1.48498	TRIM40
regulation of necrotic cell death (GO:0010939)	2021-01-13	0.441837	0.999995	0	0	1.81802	1.48498	RIPK1
prostanoid biosynthetic process (GO:0046457)	2021-01-13	0.441837	0.999995	0	0	1.81802	1.48498	EDN1
cranial nerve development (GO:0021545)	2021-01-13	0.441837	0.999995	0	0	1.81802	1.48498	ISL1
regulation of T cell cytokine production (GO:0002724)	2021-01-13	0.441837	0.999995	0	0	1.81802	1.48498	HFE
positive regulation of alpha-beta T cell proliferation (GO:0046641)	2021-01-13	0.441837	0.999995	0	0	1.81802	1.48498	HLA-E
regulation of transcription initiation from RNA polymerase II promoter (GO:0060260)	2021-01-13	0.441837	0.999995	0	0	1.81802	1.48498	SUB1
glomerular visceral epithelial cell differentiation (GO:0072112)	2021-01-13	0.441837	0.999995	0	0	1.81802	1.48498	BASP1
negative regulation of chemokine production (GO:0032682)	2021-01-13	0.441837	0.999995	0	0	1.81802	1.48498	GSTP1
mitotic DNA integrity checkpoint (GO:0044774)	2021-01-13	0.441837	0.999995	0	0	1.81802	1.48498	RAD17
ribonucleoprotein complex disassembly (GO:0032988)	2021-01-13	0.441837	0.999995	0	0	1.81802	1.48498	PELO
regulation of interleukin-8 production (GO:0032677)	1934-02-01	0.442942	0.999995	0	0	1.36364	1.11044	RIPK1;TNF
negative regulation of DNA binding (GO:0043392)	1934-02-01	0.442942	0.999995	0	0	1.36364	1.11044	GZMA;ID4
positive regulation of telomere maintenance via telomere lengthening (GO:1904358)	1934-02-01	0.442942	0.999995	0	0	1.36364	1.11044	FBXO4;CCT5
positive regulation of DNA binding (GO:0043388)	1934-02-01	0.442942	0.999995	0	0	1.36364	1.11044	FOXC1;NIPBL
ventricular cardiac muscle tissue morphogenesis (GO:0055010)	1934-02-01	0.442942	0.999995	0	0	1.36364	1.11044	DSP;ISL1
chromosome organization (GO:0051276)	1956-03-01	0.447533	0.999995	0	0	1.23505	0.992986	HIST1H4A;HIST1H3A;CENPH
positive regulation of protein transport (GO:0051222)	1956-03-01	0.447533	0.999995	0	0	1.23505	0.992986	UNC13B;TNF;BMP6
phosphatidylinositol-mediated signaling (GO:0048015)	1956-03-01	0.447533	0.999995	0	0	1.23505	0.992986	EDN1;ERBB2;PIK3R1
sensory perception of mechanical stimulus (GO:0050954)	1978-04-01	0.448283	0.999995	0	0	1.17947	0.946324	NDUFB9;NIPBL;MARVELD2;COL11A2
positive regulation of RNA metabolic process (GO:0051254)	1935-02-01	0.457843	0.999995	0	0	1.32225	1.03298	PIK3R1;RIOK1
positive regulation of NIK/NF-kappaB signaling (GO:1901224)	1935-02-01	0.457843	0.999995	0	0	1.32225	1.03298	RPS3;TNF
apical junction assembly (GO:0043297)	1935-02-01	0.457843	0.999995	0	0	1.32225	1.03298	OCLN;MARVELD2
regulation of phosphoprotein phosphatase activity (GO:0043666)	1935-02-01	0.457843	0.999995	0	0	1.32225	1.03298	PPP1R11;ITGA1
negative regulation of tumor necrosis factor production (GO:0032720)	1935-02-01	0.457843	0.999995	0	0	1.32225	1.03298	GSTP1;NFKBIL1
flagellated sperm motility (GO:0030317)	1935-02-01	0.457843	0.999995	0	0	1.32225	1.03298	DDX4;ROPN1L
cellular respiration (GO:0045333)	1957-03-01	0.459081	0.999995	0	0	1.21212	0.943666	ALDH5A1;NDUFS4;NDUFAF2
positive regulation of cell adhesion mediated by integrin (GO:0033630)	2021-01-14	0.466328	0.999995	0	0	1.67808	1.28015	CIB1
intermediate filament organization (GO:0045109)	2021-01-14	0.466328	0.999995	0	0	1.67808	1.28015	DSP
clathrin coat assembly (GO:0048268)	2021-01-14	0.466328	0.999995	0	0	1.67808	1.28015	CLTB
positive regulation of osteoclast differentiation (GO:0045672)	2021-01-14	0.466328	0.999995	0	0	1.67808	1.28015	TNF
regulation of activin receptor signaling pathway (GO:0032925)	2021-01-14	0.466328	0.999995	0	0	1.67808	1.28015	FST
regulation of phosphate metabolic process (GO:0019220)	2021-01-14	0.466328	0.999995	0	0	1.67808	1.28015	RAD17
regulation of extracellular matrix disassembly (GO:0010715)	2021-01-14	0.466328	0.999995	0	0	1.67808	1.28015	DDR1
negative regulation of interleukin-1 beta production (GO:0032691)	2021-01-14	0.466328	0.999995	0	0	1.67808	1.28015	GSTP1
regulation of calcineurin-NFAT signaling cascade (GO:0070884)	2021-01-14	0.466328	0.999995	0	0	1.67808	1.28015	CIB1
glucuronate metabolic process (GO:0019585)	2021-01-14	0.466328	0.999995	0	0	1.67808	1.28015	ABHD10
pyrimidine-containing compound catabolic process (GO:0072529)	2021-01-14	0.466328	0.999995	0	0	1.67808	1.28015	NT5E
pancreas development (GO:0031016)	2021-01-14	0.466328	0.999995	0	0	1.67808	1.28015	ISL1
regulation of defense response to virus (GO:0050688)	2021-01-14	0.466328	0.999995	0	0	1.67808	1.28015	PCBP2
hydrogen peroxide catabolic process (GO:0042744)	2021-01-14	0.466328	0.999995	0	0	1.67808	1.28015	PRDX6
purine-containing compound salvage (GO:0043101)	2021-01-14	0.466328	0.999995	0	0	1.67808	1.28015	GMPR
positive regulation of glycogen metabolic process (GO:0070875)	2021-01-14	0.466328	0.999995	0	0	1.67808	1.28015	DYRK2
cAMP biosynthetic process (GO:0006171)	2021-01-14	0.466328	0.999995	0	0	1.67808	1.28015	ADCY2
DNA damage response, signal transduction resulting in transcription (GO:0042772)	2021-01-14	0.466328	0.999995	0	0	1.67808	1.28015	TP53
regulation of gastrulation (GO:0010470)	2021-01-14	0.466328	0.999995	0	0	1.67808	1.28015	PHLDB1
negative regulation of smooth muscle cell migration (GO:0014912)	2021-01-14	0.466328	0.999995	0	0	1.67808	1.28015	AIF1
purine nucleotide catabolic process (GO:0006195)	2021-01-14	0.466328	0.999995	0	0	1.67808	1.28015	NT5E
positive regulation of heart rate (GO:0010460)	2021-01-14	0.466328	0.999995	0	0	1.67808	1.28015	EDN1
positive regulation of muscle hypertrophy (GO:0014742)	2021-01-14	0.466328	0.999995	0	0	1.67808	1.28015	EDN1
establishment of protein localization to chromosome (GO:0070199)	2021-01-14	0.466328	0.999995	0	0	1.67808	1.28015	NIPBL
regulation of mitotic cell cycle spindle assembly checkpoint (GO:0090266)	2021-01-14	0.466328	0.999995	0	0	1.67808	1.28015	CCNB1
purine-containing compound catabolic process (GO:0072523)	2021-01-14	0.466328	0.999995	0	0	1.67808	1.28015	NT5E
positive regulation of cell morphogenesis involved in differentiation (GO:0010770)	1958-03-01	0.470525	0.999995	0	0	1.19001	0.89716	CIB1;RREB1;S100A10
actin polymerization or depolymerization (GO:0008154)	1936-02-01	0.47251	0.999995	0	0	1.28329	0.962082	AIF1;CAP2
regulation of receptor-mediated endocytosis (GO:0048259)	1936-02-01	0.47251	0.999995	0	0	1.28329	0.962082	HFE;SMAP1
histone exchange (GO:0043486)	1936-02-01	0.47251	0.999995	0	0	1.28329	0.962082	HIST1H4A;CENPH
carbohydrate biosynthetic process (GO:0016051)	1936-02-01	0.47251	0.999995	0	0	1.28329	0.962082	GALNT4;POC1B-GALNT4
positive regulation of signaling (GO:0023056)	1936-02-01	0.47251	0.999995	0	0	1.28329	0.962082	EDN1;CLSTN1
centromere complex assembly (GO:0034508)	1936-02-01	0.47251	0.999995	0	0	1.28329	0.962082	HIST1H4A;CENPH
spermatid development (GO:0007286)	1936-02-01	0.47251	0.999995	0	0	1.28329	0.962082	CIB1;CDYL
sensory perception of sound (GO:0007605)	1981-04-01	0.477383	0.999995	0	0	1.13334	0.83803	NDUFB9;NIPBL;MARVELD2;COL11A2
G2/M transition of mitotic cell cycle (GO:0000086)	6/126	0.477651	0.999995	0	0	1.09087	0.806018	CCNB1;CDK7;TUBB;CEP72;TUBB4B;FBXL7
regulation of extrinsic apoptotic signaling pathway (GO:2001236)	1959-03-01	0.481857	0.999995	0	0	1.1687	0.853279	CYLD;GSTP1;RIPK1
cell cycle G2/M phase transition (GO:0044839)	6/127	0.485319	0.999995	0	0	1.0818	0.782085	CCNB1;CDK7;TUBB;CEP72;TUBB4B;FBXL7
protein peptidyl-prolyl isomerization (GO:0000413)	1937-02-01	0.486934	0.999995	0	0	1.24656	0.897059	PPWD1;CWC27
regulation of DNA repair (GO:0006282)	1937-02-01	0.486934	0.999995	0	0	1.24656	0.897059	RPS3;UBE2V2
nucleotide-excision repair, DNA incision, 5'-to lesion (GO:0006296)	1937-02-01	0.486934	0.999995	0	0	1.24656	0.897059	PAPD7;GTF2H4
negative regulation of NF-kappaB transcription factor activity (GO:0032088)	1982-04-01	0.486953	0.999995	0	0	1.11875	0.805038	CYLD;TRIM40;PRMT2;NFKBIL1
positive regulation of peptidyl-lysine acetylation (GO:2000758)	2021-01-15	0.489746	0.999995	0	0	1.55814	1.11231	SOX4
atrioventricular valve morphogenesis (GO:0003181)	2021-01-15	0.489746	0.999995	0	0	1.55814	1.11231	SOX4
catecholamine metabolic process (GO:0006584)	2021-01-15	0.489746	0.999995	0	0	1.55814	1.11231	RNF180
digestive tract morphogenesis (GO:0048546)	2021-01-15	0.489746	0.999995	0	0	1.55814	1.11231	NIPBL
epithelial cilium movement (GO:0003351)	2021-01-15	0.489746	0.999995	0	0	1.55814	1.11231	ROPN1L
autonomic nervous system development (GO:0048483)	2021-01-15	0.489746	0.999995	0	0	1.55814	1.11231	SOX4
endocardial cushion morphogenesis (GO:0003203)	2021-01-15	0.489746	0.999995	0	0	1.55814	1.11231	ISL1
positive regulation of mesonephros development (GO:0061213)	2021-01-15	0.489746	0.999995	0	0	1.55814	1.11231	BASP1
mitotic sister chromatid cohesion (GO:0007064)	2021-01-15	0.489746	0.999995	0	0	1.55814	1.11231	NIPBL
substrate-dependent cell migration (GO:0006929)	2021-01-15	0.489746	0.999995	0	0	1.55814	1.11231	ITGA2
L-alpha-amino acid transmembrane transport (GO:1902475)	2021-01-15	0.489746	0.999995	0	0	1.55814	1.11231	SLC1A3
regulation of interleukin-4 production (GO:0032673)	2021-01-15	0.489746	0.999995	0	0	1.55814	1.11231	HLA-E
negative regulation of coagulation (GO:0050819)	2021-01-15	0.489746	0.999995	0	0	1.55814	1.11231	EDN1
glycerophospholipid catabolic process (GO:0046475)	2021-01-15	0.489746	0.999995	0	0	1.55814	1.11231	PRDX6
positive regulation of telomerase RNA localization to Cajal body (GO:1904874)	2021-01-15	0.489746	0.999995	0	0	1.55814	1.11231	CCT5
negative regulation of cell aging (GO:0090344)	2021-01-15	0.489746	0.999995	0	0	1.55814	1.11231	ZKSCAN3
mesenchyme morphogenesis (GO:0072132)	2021-01-15	0.489746	0.999995	0	0	1.55814	1.11231	ISL1
regulation of clathrin-dependent endocytosis (GO:2000369)	2021-01-15	0.489746	0.999995	0	0	1.55814	1.11231	SMAP1
pyrimidine nucleoside metabolic process (GO:0006213)	2021-01-15	0.489746	0.999995	0	0	1.55814	1.11231	NT5E
negative regulation of lipid catabolic process (GO:0050995)	2021-01-15	0.489746	0.999995	0	0	1.55814	1.11231	TNF
positive regulation of phosphoprotein phosphatase activity (GO:0032516)	2021-01-15	0.489746	0.999995	0	0	1.55814	1.11231	ITGA1
negative regulation of cellular component movement (GO:0051271)	2021-01-15	0.489746	0.999995	0	0	1.55814	1.11231	SPINT2
cellular biogenic amine biosynthetic process (GO:0042401)	2021-01-15	0.489746	0.999995	0	0	1.55814	1.11231	SAT1
mesenchymal cell development (GO:0014031)	2021-01-15	0.489746	0.999995	0	0	1.55814	1.11231	FOXC1
positive regulation of membrane protein ectodomain proteolysis (GO:0051044)	2021-01-15	0.489746	0.999995	0	0	1.55814	1.11231	TNF
positive regulation of cellular response to insulin stimulus (GO:1900078)	2021-01-15	0.489746	0.999995	0	0	1.55814	1.11231	PIK3R1
positive regulation of interleukin-4 production (GO:0032753)	2021-01-15	0.489746	0.999995	0	0	1.55814	1.11231	HLA-E
negative regulation of DNA-dependent DNA replication (GO:2000104)	2021-01-15	0.489746	0.999995	0	0	1.55814	1.11231	GMNN
positive regulation of NF-kappaB import into nucleus (GO:0042346)	2021-01-15	0.489746	0.999995	0	0	1.55814	1.11231	TNF
microtubule depolymerization (GO:0007019)	2021-01-15	0.489746	0.999995	0	0	1.55814	1.11231	KIF2A
JAK-STAT cascade involved in growth hormone signaling pathway (GO:0060397)	2021-01-15	0.489746	0.999995	0	0	1.55814	1.11231	GHR
regulation of protein complex disassembly (GO:0043244)	2021-01-15	0.489746	0.999995	0	0	1.55814	1.11231	TNF
regulation of lymphocyte proliferation (GO:0050670)	2021-01-15	0.489746	0.999995	0	0	1.55814	1.11231	LST1
regulation of T cell mediated cytotoxicity (GO:0001914)	2021-01-15	0.489746	0.999995	0	0	1.55814	1.11231	HLA-E
embryonic cranial skeleton morphogenesis (GO:0048701)	2021-01-15	0.489746	0.999995	0	0	1.55814	1.11231	NIPBL
positive regulation of cysteine-type endopeptidase activity involved in apoptotic signaling pathway (GO:2001269)	2021-01-15	0.489746	0.999995	0	0	1.55814	1.11231	RIPK1
positive regulation of protein export from nucleus (GO:0046827)	2021-01-15	0.489746	0.999995	0	0	1.55814	1.11231	TP53
cytoplasmic sequestering of protein (GO:0051220)	2021-01-15	0.489746	0.999995	0	0	1.55814	1.11231	NFKBIL1
regulation of cell junction assembly (GO:1901888)	2021-01-15	0.489746	0.999995	0	0	1.55814	1.11231	OCLN
cellular response to corticosteroid stimulus (GO:0071384)	2021-01-15	0.489746	0.999995	0	0	1.55814	1.11231	ISL1
positive regulation of NF-kappaB transcription factor activity (GO:0051092)	6/128	0.492952	0.999995	0	0	1.07288	0.758892	RPS3;CIB1;TRIM15;RIPK1;TRIM38;TNF
DNA-templated transcription, termination (GO:0006353)	5/106	0.498769	0.999995	0	0	1.07991	0.7512	CDK7;ZNRD1;PABPN1;MAZ;GTF2H4
positive regulation of cellular component organization (GO:0051130)	5/106	0.498769	0.999995	0	0	1.07991	0.7512	CD63;CD151;CLSTN1;RPS3;TNF
positive regulation of innate immune response (GO:0045089)	1938-02-01	0.50111	0.999995	0	0	1.21187	0.837319	TRIM15;HLA-E
retina homeostasis (GO:0001895)	1938-02-01	0.50111	0.999995	0	0	1.21187	0.837319	POC1B;ACTG1
positive regulation of T cell proliferation (GO:0042102)	1961-03-01	0.504168	0.999995	0	0	1.12828	0.772701	RPS3;AIF1;HLA-DPA1
positive regulation of cellular amide metabolic process (GO:0034250)	1961-03-01	0.504168	0.999995	0	0	1.12828	0.772701	ERBB2;TNF;SOX4
regulation of cell cycle G2/M phase transition (GO:1902749)	1984-04-01	0.505873	0.999995	0	0	1.09066	0.743255	TUBB;CEP72;TUBB4B;TP53
mitochondrial translation (GO:0032543)	5/107	0.507103	0.999995	0	0	1.06927	0.726077	NDUFA7;MRPS25;MRPS36;MRPS18B;MRPS30
neural tube development (GO:0021915)	2021-01-16	0.512137	0.999995	0	0	1.45419	0.973086	SOX4
negative regulation of NF-kappaB import into nucleus (GO:0042347)	2021-01-16	0.512137	0.999995	0	0	1.45419	0.973086	CYLD
lipopolysaccharide-mediated signaling pathway (GO:0031663)	2021-01-16	0.512137	0.999995	0	0	1.45419	0.973086	TNF
regulation of systemic arterial blood pressure by hormone (GO:0001990)	2021-01-16	0.512137	0.999995	0	0	1.45419	0.973086	EDN1
positive regulation of cardiac muscle tissue growth (GO:0055023)	2021-01-16	0.512137	0.999995	0	0	1.45419	0.973086	EDN1
negative regulation of immune effector process (GO:0002698)	2021-01-16	0.512137	0.999995	0	0	1.45419	0.973086	PCBP2
DNA alkylation (GO:0006305)	2021-01-16	0.512137	0.999995	0	0	1.45419	0.973086	MTRR
glucose 6-phosphate metabolic process (GO:0051156)	2021-01-16	0.512137	0.999995	0	0	1.45419	0.973086	PHACTR1
leukocyte tethering or rolling (GO:0050901)	2021-01-16	0.512137	0.999995	0	0	1.45419	0.973086	TNF
regulation of RIG-I signaling pathway (GO:0039535)	2021-01-16	0.512137	0.999995	0	0	1.45419	0.973086	TRIM15
histone H2A acetylation (GO:0043968)	2021-01-16	0.512137	0.999995	0	0	1.45419	0.973086	MORF4L2
regulation of cell cycle phase transition (GO:1901987)	2021-01-16	0.512137	0.999995	0	0	1.45419	0.973086	TP53
cytoplasmic sequestering of transcription factor (GO:0042994)	2021-01-16	0.512137	0.999995	0	0	1.45419	0.973086	NFKBIL1
sympathetic nervous system development (GO:0048485)	2021-01-16	0.512137	0.999995	0	0	1.45419	0.973086	SOX4
positive regulation of mRNA processing (GO:0050685)	2021-01-16	0.512137	0.999995	0	0	1.45419	0.973086	PRDX6
leukocyte adhesion to vascular endothelial cell (GO:0061756)	2021-01-16	0.512137	0.999995	0	0	1.45419	0.973086	TNF
positive regulation of antigen receptor-mediated signaling pathway (GO:0050857)	2021-01-16	0.512137	0.999995	0	0	1.45419	0.973086	RPS3
positive regulation of cardiac muscle hypertrophy (GO:0010613)	2021-01-16	0.512137	0.999995	0	0	1.45419	0.973086	EDN1
DNA methylation or demethylation (GO:0044728)	2021-01-16	0.512137	0.999995	0	0	1.45419	0.973086	MTRR
positive regulation of immune system process (GO:0002684)	2021-01-16	0.512137	0.999995	0	0	1.45419	0.973086	HLA-G
regulation of osteoblast proliferation (GO:0033688)	2021-01-16	0.512137	0.999995	0	0	1.45419	0.973086	NPR3
regulation of SMAD protein import into nucleus (GO:0060390)	2021-01-16	0.512137	0.999995	0	0	1.45419	0.973086	BMP6
positive regulation of nitric-oxide synthase activity (GO:0051000)	2021-01-16	0.512137	0.999995	0	0	1.45419	0.973086	NPR3
positive regulation of G2/M transition of mitotic cell cycle (GO:0010971)	2021-01-16	0.512137	0.999995	0	0	1.45419	0.973086	CCNB1
regulation of protein homodimerization activity (GO:0043496)	2021-01-16	0.512137	0.999995	0	0	1.45419	0.973086	ISL1
positive regulation of cell migration involved in sprouting angiogenesis (GO:0090050)	2021-01-16	0.512137	0.999995	0	0	1.45419	0.973086	CIB1
odontogenesis of dentin-containing tooth (GO:0042475)	2021-01-16	0.512137	0.999995	0	0	1.45419	0.973086	FOXC1
positive regulation of G1/S transition of mitotic cell cycle (GO:1900087)	2021-01-16	0.512137	0.999995	0	0	1.45419	0.973086	AIF1
regulation of necroptotic process (GO:0060544)	2021-01-16	0.512137	0.999995	0	0	1.45419	0.973086	RIPK1
activation of protein kinase A activity (GO:0034199)	2021-01-16	0.512137	0.999995	0	0	1.45419	0.973086	ADCY2
protein localization to chromatin (GO:0071168)	2021-01-16	0.512137	0.999995	0	0	1.45419	0.973086	NIPBL
ruffle organization (GO:0031529)	2021-01-16	0.512137	0.999995	0	0	1.45419	0.973086	AIF1
linoleic acid metabolic process (GO:0043651)	2021-01-16	0.512137	0.999995	0	0	1.45419	0.973086	GSTP1
neurotransmitter transport (GO:0006836)	2021-01-16	0.512137	0.999995	0	0	1.45419	0.973086	SLC1A3
mesenchyme development (GO:0060485)	2021-01-16	0.512137	0.999995	0	0	1.45419	0.973086	ISL1
positive regulation of response to endoplasmic reticulum stress (GO:1905898)	2021-01-16	0.512137	0.999995	0	0	1.45419	0.973086	PIK3R1
negative regulation of lipid storage (GO:0010888)	2021-01-16	0.512137	0.999995	0	0	1.45419	0.973086	TNF
regulation of intrinsic apoptotic signaling pathway in response to DNA damage (GO:1902229)	2021-01-16	0.512137	0.999995	0	0	1.45419	0.973086	RPS3
positive regulation of DNA-templated transcription, initiation (GO:2000144)	2021-01-16	0.512137	0.999995	0	0	1.45419	0.973086	SUB1
clathrin-dependent endocytosis (GO:0072583)	1939-02-01	0.515031	0.999995	0	0	1.17906	0.782339	CLTB;AP2B1
ERBB2 signaling pathway (GO:0038128)	1939-02-01	0.515031	0.999995	0	0	1.17906	0.782339	ERBB2;PIK3R1
DNA replication-independent nucleosome assembly (GO:0006336)	1939-02-01	0.515031	0.999995	0	0	1.17906	0.782339	HIST1H4A;CENPH
DNA damage response, signal transduction by p53 class mediator resulting in cell cycle arrest (GO:0006977)	1962-03-01	0.515136	0.999995	0	0	1.1091	0.735696	CCNB1;TP53;SOX4
tRNA processing (GO:0008033)	1962-03-01	0.515136	0.999995	0	0	1.1091	0.735696	RPP21;CDKAL1;FARS2
regulation of T cell proliferation (GO:0042129)	1962-03-01	0.515136	0.999995	0	0	1.1091	0.735696	HLA-G;AIF1;HLA-DPA1
kidney development (GO:0001822)	1963-03-01	0.525972	0.999995	0	0	1.09056	0.700693	NIPBL;FOXC1;SOX4
iron ion homeostasis (GO:0055072)	1963-03-01	0.525972	0.999995	0	0	1.09056	0.700693	NDFIP1;HFE;BMP6
signal transduction involved in mitotic G1 DNA damage checkpoint (GO:0072431)	1963-03-01	0.525972	0.999995	0	0	1.09056	0.700693	CCNB1;TP53;SOX4
rRNA processing (GO:0006364)	9/202	0.528596	0.999995	0	0	1.01699	0.648361	NOP56;FBL;RPL18A;RPLP0;RPS3;RPP21;RIOK1;RPL18;SKIV2L2
negative regulation of transport (GO:0051051)	1940-02-01	0.528691	0.999995	0	0	1.14797	0.73166	NDFIP1;TRIM15
nucleotide-excision repair, DNA incision (GO:0033683)	1940-02-01	0.528691	0.999995	0	0	1.14797	0.73166	PAPD7;GTF2H4
positive regulation of epithelial to mesenchymal transition (GO:0010718)	1940-02-01	0.528691	0.999995	0	0	1.14797	0.73166	FOXC1;GCNT2
positive regulation of mitotic nuclear division (GO:0045840)	1940-02-01	0.528691	0.999995	0	0	1.14797	0.73166	NIPBL;EDN1
positive regulation of mitotic cell cycle phase transition (GO:1901992)	1940-02-01	0.528691	0.999995	0	0	1.14797	0.73166	CCNB1;AIF1
peptidyl-proline modification (GO:0018208)	1940-02-01	0.528691	0.999995	0	0	1.14797	0.73166	PPWD1;CWC27
negative regulation of catabolic process (GO:0009895)	1940-02-01	0.528691	0.999995	0	0	1.14797	0.73166	TRIM40;TNF
regulation of viral transcription (GO:0046782)	1940-02-01	0.528691	0.999995	0	0	1.14797	0.73166	SUPT4H1;TRIM31
JAK-STAT cascade (GO:0007259)	1940-02-01	0.528691	0.999995	0	0	1.14797	0.73166	GHR;IL31RA
positive regulation of protein processing (GO:0010954)	2021-01-17	0.533547	0.999995	0	0	1.36323	0.85639	NKD2
regulation of multicellular organism growth (GO:0040014)	2021-01-17	0.533547	0.999995	0	0	1.36323	0.85639	GHR
positive regulation of cell cycle G2/M phase transition (GO:1902751)	2021-01-17	0.533547	0.999995	0	0	1.36323	0.85639	CCNB1
cellular glucuronidation (GO:0052695)	2021-01-17	0.533547	0.999995	0	0	1.36323	0.85639	ABHD10
positive regulation of focal adhesion assembly (GO:0051894)	2021-01-17	0.533547	0.999995	0	0	1.36323	0.85639	S100A10
positive regulation of lymphocyte migration (GO:2000403)	2021-01-17	0.533547	0.999995	0	0	1.36323	0.85639	AIF1
positive regulation of epidermal cell differentiation (GO:0045606)	2021-01-17	0.533547	0.999995	0	0	1.36323	0.85639	FOXC1
cellular response to gamma radiation (GO:0071480)	2021-01-17	0.533547	0.999995	0	0	1.36323	0.85639	TP53
ureteric bud development (GO:0001657)	2021-01-17	0.533547	0.999995	0	0	1.36323	0.85639	FOXC1
regulation of lipid catabolic process (GO:0050994)	2021-01-17	0.533547	0.999995	0	0	1.36323	0.85639	TNF
regulation of transposition (GO:0010528)	2021-01-17	0.533547	0.999995	0	0	1.36323	0.85639	DDX4
positive regulation of monocyte chemotaxis (GO:0090026)	2021-01-17	0.533547	0.999995	0	0	1.36323	0.85639	AIF1
positive regulation of striated muscle cell differentiation (GO:0051155)	2021-01-17	0.533547	0.999995	0	0	1.36323	0.85639	EDN1
cardiac atrium morphogenesis (GO:0003209)	2021-01-17	0.533547	0.999995	0	0	1.36323	0.85639	ISL1
negative regulation of tumor necrosis factor-mediated signaling pathway (GO:0010804)	2021-01-17	0.533547	0.999995	0	0	1.36323	0.85639	GSTP1
negative regulation of reactive oxygen species metabolic process (GO:2000378)	2021-01-17	0.533547	0.999995	0	0	1.36323	0.85639	SIRT5
spindle assembly checkpoint (GO:0071173)	2021-01-17	0.533547	0.999995	0	0	1.36323	0.85639	TRIP13
maturation of 5.8S rRNA (GO:0000460)	2021-01-17	0.533547	0.999995	0	0	1.36323	0.85639	SKIV2L2
DNA replication checkpoint (GO:0000076)	2021-01-17	0.533547	0.999995	0	0	1.36323	0.85639	RAD17
rRNA catabolic process (GO:0016075)	2021-01-17	0.533547	0.999995	0	0	1.36323	0.85639	PELO
pharyngeal system development (GO:0060037)	2021-01-17	0.533547	0.999995	0	0	1.36323	0.85639	ISL1
response to purine-containing compound (GO:0014074)	2021-01-17	0.533547	0.999995	0	0	1.36323	0.85639	NDUFS4
phospholipid catabolic process (GO:0009395)	2021-01-17	0.533547	0.999995	0	0	1.36323	0.85639	PRDX6
macrophage activation (GO:0042116)	2021-01-17	0.533547	0.999995	0	0	1.36323	0.85639	AIF1
regulation of transcription from RNA polymerase I promoter (GO:0006356)	2021-01-17	0.533547	0.999995	0	0	1.36323	0.85639	ERBB2
nucleotide catabolic process (GO:0009166)	2021-01-17	0.533547	0.999995	0	0	1.36323	0.85639	NT5E
regulation of T cell migration (GO:2000404)	2021-01-17	0.533547	0.999995	0	0	1.36323	0.85639	AIF1
mesonephric tubule development (GO:0072164)	2021-01-17	0.533547	0.999995	0	0	1.36323	0.85639	FOXC1
nucleobase-containing compound biosynthetic process (GO:0034654)	2021-01-17	0.533547	0.999995	0	0	1.36323	0.85639	GMPR
cellular response to glucocorticoid stimulus (GO:0071385)	2021-01-17	0.533547	0.999995	0	0	1.36323	0.85639	ISL1
mitotic spindle assembly checkpoint (GO:0007094)	2021-01-17	0.533547	0.999995	0	0	1.36323	0.85639	TRIP13
mitotic spindle checkpoint (GO:0071174)	2021-01-17	0.533547	0.999995	0	0	1.36323	0.85639	TRIP13
positive regulation of natural killer cell mediated immunity (GO:0002717)	2021-01-17	0.533547	0.999995	0	0	1.36323	0.85639	HLA-E
mitochondrial translational elongation (GO:0070125)	1987-04-01	0.53365	0.999995	0	0	1.05108	0.660093	MRPS25;MRPS36;MRPS18B;MRPS30
regulation of MAP kinase activity (GO:0043405)	1987-04-01	0.53365	0.999995	0	0	1.05108	0.660093	EDN1;GSTP1;ERBB2;TNF
negative regulation of neuron differentiation (GO:0045665)	1964-03-01	0.536673	0.999995	0	0	1.07263	0.667566	MYLIP;ID4;CIB1
positive regulation of cell adhesion (GO:0045785)	1964-03-01	0.536673	0.999995	0	0	1.07263	0.667566	ERBB2;CIB1;TNF
regulation of stress-activated MAPK cascade (GO:0032872)	1941-02-01	0.542088	0.999995	0	0	1.11848	0.684873	QARS;GSTP1
telomere organization (GO:0032200)	1941-02-01	0.542088	0.999995	0	0	1.11848	0.684873	HIST1H4A;HIST1H3A
positive regulation of receptor-mediated endocytosis (GO:0048260)	1941-02-01	0.542088	0.999995	0	0	1.11848	0.684873	CD63;HFE
negative regulation of cell projection organization (GO:0031345)	1941-02-01	0.542088	0.999995	0	0	1.11848	0.684873	MYLIP;CIB1
regulation of proteasomal ubiquitin-dependent protein catabolic process (GO:0032434)	1988-04-01	0.542735	0.999995	0	0	1.03851	0.634669	RNF144B;HFE;RNF180;NKD2
O-glycan processing (GO:0016266)	1965-03-01	0.547235	0.999995	0	0	1.05527	0.636198	GALNT4;POC1B-GALNT4;MUC21
negative regulation of apoptotic signaling pathway (GO:2001234)	1965-03-01	0.547235	0.999995	0	0	1.05527	0.636198	QARS;GSTP1;RIPK1
negative regulation of cell adhesion (GO:0007162)	1965-03-01	0.547235	0.999995	0	0	1.05527	0.636198	GCNT2;SPINT2;MUC21
mitochondrial translational termination (GO:0070126)	1989-04-01	0.551728	0.999995	0	0	1.02624	0.610303	MRPS25;MRPS36;MRPS18B;MRPS30
SRP-dependent cotranslational protein targeting to membrane (GO:0006614)	1989-04-01	0.551728	0.999995	0	0	1.02624	0.610303	RPL18A;RPLP0;RPS3;RPL18
regulation of telomerase RNA localization to Cajal body (GO:1904872)	2021-01-18	0.554019	0.999995	0	0	1.28297	0.757667	CCT5
actin filament polymerization (GO:0030041)	2021-01-18	0.554019	0.999995	0	0	1.28297	0.757667	AIF1
release of cytochrome c from mitochondria (GO:0001836)	2021-01-18	0.554019	0.999995	0	0	1.28297	0.757667	SOD2
regulation of mitochondrial membrane permeability (GO:0046902)	2021-01-18	0.554019	0.999995	0	0	1.28297	0.757667	TP53
regulation of chemokine production (GO:0032642)	2021-01-18	0.554019	0.999995	0	0	1.28297	0.757667	TNF
regulation of oxidative stress-induced intrinsic apoptotic signaling pathway (GO:1902175)	2021-01-18	0.554019	0.999995	0	0	1.28297	0.757667	SOD2
negative regulation of protein dephosphorylation (GO:0035308)	2021-01-18	0.554019	0.999995	0	0	1.28297	0.757667	PPP1R11
prostaglandin biosynthetic process (GO:0001516)	2021-01-18	0.554019	0.999995	0	0	1.28297	0.757667	EDN1
negative regulation of microtubule depolymerization (GO:0007026)	2021-01-18	0.554019	0.999995	0	0	1.28297	0.757667	CIB1
retrograde protein transport, ER to cytosol (GO:0030970)	2021-01-18	0.554019	0.999995	0	0	1.28297	0.757667	HM13
negative regulation of oxidative stress-induced intrinsic apoptotic signaling pathway (GO:1902176)	2021-01-18	0.554019	0.999995	0	0	1.28297	0.757667	SOD2
negative regulation of protein transport (GO:0051224)	2021-01-18	0.554019	0.999995	0	0	1.28297	0.757667	NDFIP1
DNA methylation (GO:0006306)	2021-01-18	0.554019	0.999995	0	0	1.28297	0.757667	MTRR
glyceraldehyde-3-phosphate metabolic process (GO:0019682)	2021-01-18	0.554019	0.999995	0	0	1.28297	0.757667	PHACTR1
piRNA metabolic process (GO:0034587)	2021-01-18	0.554019	0.999995	0	0	1.28297	0.757667	DDX4
response to organophosphorus (GO:0046683)	2021-01-18	0.554019	0.999995	0	0	1.28297	0.757667	NDUFS4
positive regulation of morphogenesis of an epithelium (GO:1905332)	2021-01-18	0.554019	0.999995	0	0	1.28297	0.757667	RREB1
regulation of interleukin-6 production (GO:0032675)	1942-02-01	0.555217	0.999995	0	0	1.09046	0.64162	TNF;ISL1
regulation of protein modification process (GO:0031399)	1942-02-01	0.555217	0.999995	0	0	1.09046	0.64162	NDUFS4;ROPN1L
positive regulation of response to external stimulus (GO:0032103)	1990-04-01	0.560628	0.999995	0	0	1.01425	0.586946	PTGER4;LY86;TRIM15;BMP6
regulation of signal transduction by p53 class mediator (GO:1901796)	6/138	0.566854	0.999995	0	0	0.991076	0.562587	DYRK2;SETD9;PAK1IP1;RAD17;PRKAB1;TP53
negative regulation of protein binding (GO:0032091)	1967-03-01	0.567929	0.999995	0	0	1.02219	0.578311	HFE;ISL1;PTPRF
extrinsic apoptotic signaling pathway (GO:0097191)	1967-03-01	0.567929	0.999995	0	0	1.02219	0.578311	CIB1;RIPK1;TNF
regulation of protein localization to plasma membrane (GO:1903076)	1967-03-01	0.567929	0.999995	0	0	1.02219	0.578311	CIB1;PIK3R1;NKD2
positive regulation of interferon-gamma production (GO:0032729)	1943-02-01	0.568078	0.999995	0	0	1.0638	0.601579	ISL1;HLA-DPA1
cardiac ventricle morphogenesis (GO:0003208)	1943-02-01	0.568078	0.999995	0	0	1.0638	0.601579	ISL1;SOX4
negative regulation of ERBB signaling pathway (GO:1901185)	1943-02-01	0.568078	0.999995	0	0	1.0638	0.601579	ERBB2;ITGA1
negative regulation of protein metabolic process (GO:0051248)	1943-02-01	0.568078	0.999995	0	0	1.0638	0.601579	EDN1;TRIM40
eye development (GO:0001654)	1943-02-01	0.568078	0.999995	0	0	1.0638	0.601579	FOXC1;NIPBL
intrinsic apoptotic signaling pathway by p53 class mediator (GO:0072332)	1943-02-01	0.568078	0.999995	0	0	1.0638	0.601579	DYRK2;TP53
regulation of multicellular organismal development (GO:2000026)	1943-02-01	0.568078	0.999995	0	0	1.0638	0.601579	PHLDB1;NIPBL
regulation of interferon-gamma production (GO:0032649)	1943-02-01	0.568078	0.999995	0	0	1.0638	0.601579	ISL1;HLA-DPA1
cellular response to lipopolysaccharide (GO:0071222)	1991-04-01	0.56943	0.999995	0	0	1.00254	0.564551	PABPN1;NFKBIL1;GSTP1;TNF
protein ADP-ribosylation (GO:0006471)	2021-01-19	0.573592	0.999995	0	0	1.21163	0.673468	PARP8
negative regulation of cell junction assembly (GO:1901889)	2021-01-19	0.573592	0.999995	0	0	1.21163	0.673468	TNF
positive regulation of heart contraction (GO:0045823)	2021-01-19	0.573592	0.999995	0	0	1.21163	0.673468	EDN1
endoplasmic reticulum mannose trimming (GO:1904380)	2021-01-19	0.573592	0.999995	0	0	1.21163	0.673468	2021-03-06
NADP metabolic process (GO:0006739)	2021-01-19	0.573592	0.999995	0	0	1.21163	0.673468	PHACTR1
regulation of long-term synaptic potentiation (GO:1900271)	2021-01-19	0.573592	0.999995	0	0	1.21163	0.673468	SCGN
positive regulation of STAT cascade (GO:1904894)	2021-01-19	0.573592	0.999995	0	0	1.21163	0.673468	IL7R
positive regulation of activated T cell proliferation (GO:0042104)	2021-01-19	0.573592	0.999995	0	0	1.21163	0.673468	RPS3
maturation of 5.8S rRNA from tricistronic rRNA transcript (SSU-rRNA, 5.8S rRNA, LSU-rRNA) (GO:0000466)	2021-01-19	0.573592	0.999995	0	0	1.21163	0.673468	ABT1
negative regulation of transposition (GO:0010529)	2021-01-19	0.573592	0.999995	0	0	1.21163	0.673468	DDX4
endothelial cell development (GO:0001885)	2021-01-19	0.573592	0.999995	0	0	1.21163	0.673468	MARVELD2
regulation of myotube differentiation (GO:0010830)	2021-01-19	0.573592	0.999995	0	0	1.21163	0.673468	RBM24
cyclic nucleotide biosynthetic process (GO:0009190)	2021-01-19	0.573592	0.999995	0	0	1.21163	0.673468	ADCY2
Rac protein signal transduction (GO:0016601)	2021-01-19	0.573592	0.999995	0	0	1.21163	0.673468	AIF1
purine ribonucleoside bisphosphate metabolic process (GO:0034035)	2021-01-19	0.573592	0.999995	0	0	1.21163	0.673468	SULT1A4
ribosomal small subunit assembly (GO:0000028)	2021-01-19	0.573592	0.999995	0	0	1.21163	0.673468	ABT1
endocardial cushion development (GO:0003197)	2021-01-19	0.573592	0.999995	0	0	1.21163	0.673468	ISL1
negative regulation of lipid metabolic process (GO:0045833)	2021-01-19	0.573592	0.999995	0	0	1.21163	0.673468	TNF
nucleosome disassembly (GO:0006337)	2021-01-19	0.573592	0.999995	0	0	1.21163	0.673468	HIST1H2BA
regulation of transcription factor import into nucleus (GO:0042990)	2021-01-19	0.573592	0.999995	0	0	1.21163	0.673468	PIK3R1
chromatin disassembly (GO:0031498)	2021-01-19	0.573592	0.999995	0	0	1.21163	0.673468	HIST1H2BA
folic acid metabolic process (GO:0046655)	2021-01-19	0.573592	0.999995	0	0	1.21163	0.673468	MTRR
regulation of neuron migration (GO:2001222)	2021-01-19	0.573592	0.999995	0	0	1.21163	0.673468	NIPBL
macromolecule biosynthetic process (GO:0009059)	2021-01-19	0.573592	0.999995	0	0	1.21163	0.673468	TNF
positive regulation of immunoglobulin production (GO:0002639)	2021-01-19	0.573592	0.999995	0	0	1.21163	0.673468	HLA-E
positive regulation of pri-miRNA transcription from RNA polymerase II promoter (GO:1902895)	2021-01-19	0.573592	0.999995	0	0	1.21163	0.673468	TP53
DNA double-strand break processing (GO:0000729)	2021-01-19	0.573592	0.999995	0	0	1.21163	0.673468	UBE2V2
telomere capping (GO:0016233)	2021-01-19	0.573592	0.999995	0	0	1.21163	0.673468	HIST1H4A
positive regulation of adherens junction organization (GO:1903393)	2021-01-19	0.573592	0.999995	0	0	1.21163	0.673468	S100A10
regulation of cAMP biosynthetic process (GO:0030817)	2021-01-19	0.573592	0.999995	0	0	1.21163	0.673468	CAP2
positive regulation of transcription regulatory region DNA binding (GO:2000679)	2021-01-19	0.573592	0.999995	0	0	1.21163	0.673468	FOXC1
mitochondrial membrane organization (GO:0007006)	2021-01-19	0.573592	0.999995	0	0	1.21163	0.673468	TP53
positive regulation of neuron apoptotic process (GO:0043525)	2021-01-19	0.573592	0.999995	0	0	1.21163	0.673468	TP53
antigen receptor-mediated signaling pathway (GO:0050851)	11/257	0.576115	0.999995	0	0	0.974704	0.537499	PSMD7;BTN3A1;MOG;BTN2A2;BTN2A1;BTN1A1;BTN3A3;PIK3R1;BTN3A2;BTN2A3P;HLA-DPA1
regulation of epithelial to mesenchymal transition (GO:0010717)	1968-03-01	0.578055	0.999995	0	0	1.00641	0.551598	PHLDB1;FOXC1;GCNT2
positive regulation of cellular metabolic process (GO:0031325)	1992-04-01	0.578133	0.999995	0	0	0.991097	0.543072	CD63;EDN1;RIPK1;TP53
negative regulation of immune system process (GO:0002683)	1944-02-01	0.580667	0.999995	0	0	1.03842	0.564464	NFKBIL1;HLA-G
positive regulation of interleukin-8 production (GO:0032757)	1944-02-01	0.580667	0.999995	0	0	1.03842	0.564464	RIPK1;TNF
negative regulation of type I interferon production (GO:0032480)	1944-02-01	0.580667	0.999995	0	0	1.03842	0.564464	CYLD;PCBP2
microtubule cytoskeleton organization involved in mitosis (GO:1902850)	1944-02-01	0.580667	0.999995	0	0	1.03842	0.564464	CCNB1;KIF2A
cotranslational protein targeting to membrane (GO:0006613)	1993-04-01	0.586735	0.999995	0	0	0.979909	0.522469	RPL18A;RPLP0;RPS3;RPL18
double-strand break repair (GO:0006302)	6/141	0.587998	0.999995	0	0	0.968899	0.514515	HIST1H4A;NIPBL;PAPD7;UBE2V2;CIB1;TRIP13
positive regulation of interleukin-2 production (GO:0032743)	2021-01-20	0.592308	0.999995	0	0	1.1478	0.601136	RPS3
hydrogen peroxide metabolic process (GO:0042743)	2021-01-20	0.592308	0.999995	0	0	1.1478	0.601136	PRDX6
negative regulation of intracellular protein transport (GO:0090317)	2021-01-20	0.592308	0.999995	0	0	1.1478	0.601136	SOX4
regulation of regulatory T cell differentiation (GO:0045589)	2021-01-20	0.592308	0.999995	0	0	1.1478	0.601136	HLA-G
synapsis (GO:0007129)	2021-01-20	0.592308	0.999995	0	0	1.1478	0.601136	TRIP13
error-prone translesion synthesis (GO:0042276)	2021-01-20	0.592308	0.999995	0	0	1.1478	0.601136	PAPD7
neuromuscular junction development (GO:0007528)	2021-01-20	0.592308	0.999995	0	0	1.1478	0.601136	UNC13B
calcium-independent cell-cell adhesion via plasma membrane cell-adhesion molecules (GO:0016338)	2021-01-20	0.592308	0.999995	0	0	1.1478	0.601136	CLDN7
regulation of DNA-templated transcription, elongation (GO:0032784)	2021-01-20	0.592308	0.999995	0	0	1.1478	0.601136	SUPT4H1
purine nucleotide metabolic process (GO:0006163)	2021-01-20	0.592308	0.999995	0	0	1.1478	0.601136	NT5E
androgen metabolic process (GO:0008209)	2021-01-20	0.592308	0.999995	0	0	1.1478	0.601136	SRD5A1
negative regulation of protein depolymerization (GO:1901880)	2021-01-20	0.592308	0.999995	0	0	1.1478	0.601136	CIB1
glial cell development (GO:0021782)	2021-01-20	0.592308	0.999995	0	0	1.1478	0.601136	SOX4
regulation of glycogen biosynthetic process (GO:0005979)	2021-01-20	0.592308	0.999995	0	0	1.1478	0.601136	DYRK2
organelle disassembly (GO:1903008)	2021-01-20	0.592308	0.999995	0	0	1.1478	0.601136	PELO
regulation of toll-like receptor signaling pathway (GO:0034121)	2021-01-20	0.592308	0.999995	0	0	1.1478	0.601136	NFKBIL1
positive regulation of T cell migration (GO:2000406)	2021-01-20	0.592308	0.999995	0	0	1.1478	0.601136	AIF1
inositol phosphate-mediated signaling (GO:0048016)	2021-01-20	0.592308	0.999995	0	0	1.1478	0.601136	EDN1
eye morphogenesis (GO:0048592)	2021-01-20	0.592308	0.999995	0	0	1.1478	0.601136	NIPBL
immune response-activating cell surface receptor signaling pathway (GO:0002429)	2021-01-20	0.592308	0.999995	0	0	1.1478	0.601136	MICB
entrainment of circadian clock by photoperiod (GO:0043153)	2021-01-20	0.592308	0.999995	0	0	1.1478	0.601136	TP53
mitochondrial gene expression (GO:0140053)	1945-02-01	0.592984	0.999995	0	0	1.01422	0.530019	NDUFA7;MRPS18B
protein complex subunit organization (GO:0071822)	1945-02-01	0.592984	0.999995	0	0	1.01422	0.530019	CENPH;COL11A2
positive regulation of proteasomal ubiquitin-dependent protein catabolic process (GO:0032436)	1970-03-01	0.597853	0.999995	0	0	0.976263	0.5022	RNF144B;RNF180;NKD2
positive regulation of sequence-specific DNA binding transcription factor activity (GO:0051091)	9/215	0.60418	0.999995	0	0	0.952155	0.479775	EDN1;RPS3;TRIM26;TRIM15;CIB1;RIPK1;TRIM38;TRIM31;TNF
cellular response to ionizing radiation (GO:0071479)	1946-02-01	0.605028	0.999995	0	0	0.991117	0.498017	NIPBL;TP53
interleukin-12-mediated signaling pathway (GO:0035722)	1946-02-01	0.605028	0.999995	0	0	0.991117	0.498017	RPLP0;SOD2
protein methylation (GO:0006479)	1946-02-01	0.605028	0.999995	0	0	0.991117	0.498017	PCMT1;PRMT2
negative regulation of protein modification by small protein conjugation or removal (GO:1903321)	1946-02-01	0.605028	0.999995	0	0	0.991117	0.498017	RPS3;SOX4
cellular response to interleukin-12 (GO:0071349)	1946-02-01	0.605028	0.999995	0	0	0.991117	0.498017	RPLP0;SOD2
regulation of cellular component movement (GO:0051270)	1946-02-01	0.605028	0.999995	0	0	0.991117	0.498017	ERBB2;ZSWIM6
positive regulation of lymphocyte proliferation (GO:0050671)	1971-03-01	0.607521	0.999995	0	0	0.961856	0.479359	AIF1;HLA-DPA1;CD320
positive regulation of transcription from RNA polymerase I promoter (GO:0045943)	2021-01-21	0.610203	0.999995	0	0	1.09035	0.538595	ERBB2
mRNA transcription (GO:0009299)	2021-01-21	0.610203	0.999995	0	0	1.09035	0.538595	TP53
cortical actin cytoskeleton organization (GO:0030866)	2021-01-21	0.610203	0.999995	0	0	1.09035	0.538595	TNF
mitochondrial electron transport, cytochrome c to oxygen (GO:0006123)	2021-01-21	0.610203	0.999995	0	0	1.09035	0.538595	COX4I1
histone lysine demethylation (GO:0070076)	2021-01-21	0.610203	0.999995	0	0	1.09035	0.538595	KDM1B
ventricular cardiac muscle tissue development (GO:0003229)	2021-01-21	0.610203	0.999995	0	0	1.09035	0.538595	ISL1
positive regulation of T cell mediated immunity (GO:0002711)	2021-01-21	0.610203	0.999995	0	0	1.09035	0.538595	HLA-E
regulation of cardiac muscle hypertrophy (GO:0010611)	2021-01-21	0.610203	0.999995	0	0	1.09035	0.538595	EDN1
zinc II ion transport (GO:0006829)	2021-01-21	0.610203	0.999995	0	0	1.09035	0.538595	SLC30A5
positive regulation of lamellipodium organization (GO:1902745)	2021-01-21	0.610203	0.999995	0	0	1.09035	0.538595	RREB1
regulation of macrophage activation (GO:0043030)	2021-01-21	0.610203	0.999995	0	0	1.09035	0.538595	IL31RA
establishment of endothelial barrier (GO:0061028)	2021-01-21	0.610203	0.999995	0	0	1.09035	0.538595	MARVELD2
regulation of interleukin-2 production (GO:0032663)	2021-01-21	0.610203	0.999995	0	0	1.09035	0.538595	RPS3
response to nicotine (GO:0035094)	2021-01-21	0.610203	0.999995	0	0	1.09035	0.538595	TNF
ventricular septum morphogenesis (GO:0060412)	2021-01-21	0.610203	0.999995	0	0	1.09035	0.538595	SOX4
nucleotide-excision repair, preincision complex stabilization (GO:0006293)	2021-01-21	0.610203	0.999995	0	0	1.09035	0.538595	GTF2H4
negative regulation of viral process (GO:0048525)	2021-01-21	0.610203	0.999995	0	0	1.09035	0.538595	TRIM31
limb morphogenesis (GO:0035108)	2021-01-21	0.610203	0.999995	0	0	1.09035	0.538595	NIPBL
meiosis I (GO:0007127)	2021-01-21	0.610203	0.999995	0	0	1.09035	0.538595	DDX4
protein-DNA complex disassembly (GO:0032986)	2021-01-21	0.610203	0.999995	0	0	1.09035	0.538595	HIST1H2BA
cellular response to alkaloid (GO:0071312)	2021-01-21	0.610203	0.999995	0	0	1.09035	0.538595	TNF
positive regulation of receptor internalization (GO:0002092)	2021-01-21	0.610203	0.999995	0	0	1.09035	0.538595	CD63
photoperiodism (GO:0009648)	2021-01-21	0.610203	0.999995	0	0	1.09035	0.538595	TP53
ERK1 and ERK2 cascade (GO:0070371)	2021-01-21	0.610203	0.999995	0	0	1.09035	0.538595	PTGER4
synaptic transmission, glutamatergic (GO:0035249)	2021-01-21	0.610203	0.999995	0	0	1.09035	0.538595	UNC13B
hepaticobiliary system development (GO:0061008)	2021-01-21	0.610203	0.999995	0	0	1.09035	0.538595	NIPBL
glutamate metabolic process (GO:0006536)	2021-01-21	0.610203	0.999995	0	0	1.09035	0.538595	ALDH5A1
translational termination (GO:0006415)	1996-04-01	0.611916	0.999995	0	0	0.947806	0.465524	MRPS25;MRPS36;MRPS18B;MRPS30
sensory perception of smell (GO:0007608)	10/241	0.616028	0.999995	0	0	0.943294	0.456991	OR2I1P;OR14J1;OR2H2;OR2J3;OR2H1;OR2J2;OR2W6P;OR2J1;OR10C1;OR2B6
response to glucose (GO:0009749)	1947-02-01	0.616801	0.999995	0	0	0.969041	0.46825	UNC13B;SOX4
polyol metabolic process (GO:0019751)	1947-02-01	0.616801	0.999995	0	0	0.969041	0.46825	ITPK1;PLCD3
regulation of intrinsic apoptotic signaling pathway (GO:2001242)	1947-02-01	0.616801	0.999995	0	0	0.969041	0.46825	CYLD;TP53
postreplication repair (GO:0006301)	1947-02-01	0.616801	0.999995	0	0	0.969041	0.46825	PAPD7;UBE2V2
positive regulation of organelle assembly (GO:1902117)	1947-02-01	0.616801	0.999995	0	0	0.969041	0.46825	EDN1;TNF
inositol phosphate metabolic process (GO:0043647)	1947-02-01	0.616801	0.999995	0	0	0.969041	0.46825	ITPK1;PLCD3
positive regulation of pathway-restricted SMAD protein phosphorylation (GO:0010862)	1947-02-01	0.616801	0.999995	0	0	0.969041	0.46825	HFE;BMP6
SCF-dependent proteasomal ubiquitin-dependent protein catabolic process (GO:0031146)	1972-03-01	0.617033	0.999995	0	0	0.947866	0.457661	PSMD7;FBXO4;FBXL7
protein targeting to ER (GO:0045047)	1997-04-01	0.620096	0.999995	0	0	0.937565	0.448044	RPL18A;RPLP0;RPS3;RPL18
antigen processing and presentation of exogenous peptide antigen via MHC class II (GO:0019886)	1997-04-01	0.620096	0.999995	0	0	0.937565	0.448044	KIF2A;AP2B1;HLA-DOA;HLA-DPA1
antigen processing and presentation of exogenous peptide antigen (GO:0002478)	1997-04-01	0.620096	0.999995	0	0	0.937565	0.448044	KIF2A;AP2B1;HLA-DOA;HLA-DPA1
skeletal system development (GO:0001501)	6/146	0.622006	0.999995	0	0	0.93405	0.443491	PTGER4;GUSBP1;NPR3;COL11A2;SOX4;BMP6
transcription-coupled nucleotide-excision repair (GO:0006283)	1973-03-01	0.626387	0.999995	0	0	0.934276	0.437042	CDK7;PAPD7;GTF2H4
positive regulation of proteasomal protein catabolic process (GO:1901800)	1973-03-01	0.626387	0.999995	0	0	0.934276	0.437042	RNF144B;RNF180;NKD2
regulation of natural killer cell mediated cytotoxicity (GO:0042269)	2021-01-22	0.627314	0.999995	0	0	1.03838	0.484204	MICA
glutathione derivative biosynthetic process (GO:1901687)	2021-01-22	0.627314	0.999995	0	0	1.03838	0.484204	GSTP1
cellular response to nerve growth factor stimulus (GO:1990090)	2021-01-22	0.627314	0.999995	0	0	1.03838	0.484204	CIB1
nucleotide-excision repair, DNA incision, 3'-to lesion (GO:0006295)	2021-01-22	0.627314	0.999995	0	0	1.03838	0.484204	GTF2H4
outflow tract septum morphogenesis (GO:0003148)	2021-01-22	0.627314	0.999995	0	0	1.03838	0.484204	ISL1
hematopoietic progenitor cell differentiation (GO:0002244)	2021-01-22	0.627314	0.999995	0	0	1.03838	0.484204	FST
negative regulation of cell cycle G1/S phase transition (GO:1902807)	2021-01-22	0.627314	0.999995	0	0	1.03838	0.484204	PRMT2
regulation of transcription from RNA polymerase III promoter (GO:0006359)	2021-01-22	0.627314	0.999995	0	0	1.03838	0.484204	ERBB2
sulfur amino acid metabolic process (GO:0000096)	2021-01-22	0.627314	0.999995	0	0	1.03838	0.484204	MTRR
nucleotide-excision repair, DNA duplex unwinding (GO:0000717)	2021-01-22	0.627314	0.999995	0	0	1.03838	0.484204	GTF2H4
purine-containing compound biosynthetic process (GO:0072522)	2021-01-22	0.627314	0.999995	0	0	1.03838	0.484204	GMPR
branched-chain amino acid metabolic process (GO:0009081)	2021-01-22	0.627314	0.999995	0	0	1.03838	0.484204	GHR
regulation of microtubule depolymerization (GO:0031114)	2021-01-22	0.627314	0.999995	0	0	1.03838	0.484204	CIB1
regulation of membrane protein ectodomain proteolysis (GO:0051043)	2021-01-22	0.627314	0.999995	0	0	1.03838	0.484204	TNF
urogenital system development (GO:0001655)	2021-01-22	0.627314	0.999995	0	0	1.03838	0.484204	ITGB4
regulation of ERBB signaling pathway (GO:1901184)	2021-01-22	0.627314	0.999995	0	0	1.03838	0.484204	ERBB2
C21-steroid hormone metabolic process (GO:0008207)	2021-01-22	0.627314	0.999995	0	0	1.03838	0.484204	SRD5A1
viral genome replication (GO:0019079)	2021-01-22	0.627314	0.999995	0	0	1.03838	0.484204	PCBP2
negative regulation of lyase activity (GO:0051350)	2021-01-22	0.627314	0.999995	0	0	1.03838	0.484204	MTRR
regulation of monocyte chemotaxis (GO:0090025)	2021-01-22	0.627314	0.999995	0	0	1.03838	0.484204	AIF1
glutathione derivative metabolic process (GO:1901685)	2021-01-22	0.627314	0.999995	0	0	1.03838	0.484204	GSTP1
positive regulation of phosphatase activity (GO:0010922)	2021-01-22	0.627314	0.999995	0	0	1.03838	0.484204	ITGA1
antigen processing and presentation of peptide antigen via MHC class II (GO:0002495)	1998-04-01	0.628167	0.999995	0	0	0.927543	0.43126	KIF2A;AP2B1;HLA-DOA;HLA-DPA1
intrinsic apoptotic signaling pathway in response to DNA damage (GO:0008630)	1948-02-01	0.628301	0.999995	0	0	0.947925	0.440534	DYRK2;TP53
cellular macromolecule catabolic process (GO:0044265)	1948-02-01	0.628301	0.999995	0	0	0.947925	0.440534	RIPK1;SKIV2L2
amino acid transport (GO:0006865)	1948-02-01	0.628301	0.999995	0	0	0.947925	0.440534	SLC6A19;SLC6A18
cellular response to mechanical stimulus (GO:0071260)	1948-02-01	0.628301	0.999995	0	0	0.947925	0.440534	PTGER4;MAP3K1
positive regulation of cytokine production (GO:0001819)	9/220	0.631609	0.999995	0	0	0.929347	0.427021	PTGER4;RPS3;TRIM15;RIPK1;ISL1;HLA-G;TNF;HLA-E;HLA-DPA1
non-recombinational repair (GO:0000726)	1949-02-01	0.639532	0.999995	0	0	0.927708	0.414703	HIST1H4A;UBE2V2
glutathione metabolic process (GO:0006749)	1949-02-01	0.639532	0.999995	0	0	0.927708	0.414703	ALDH5A1;GSTP1
regulation of G2/M transition of mitotic cell cycle (GO:0010389)	6/149	0.641622	0.999995	0	0	0.91431	0.40573	CCNB1;PSMD7;TUBB;CEP72;TUBB4B;FBXL7
mitotic G2/M transition checkpoint (GO:0044818)	2021-01-23	0.643674	0.999995	0	0	0.991127	0.436654	RAD17
regulation of protein oligomerization (GO:0032459)	2021-01-23	0.643674	0.999995	0	0	0.991127	0.436654	TP53
negative regulation of viral transcription (GO:0032897)	2021-01-23	0.643674	0.999995	0	0	0.991127	0.436654	TRIM31
nucleotide-excision repair, DNA gap filling (GO:0006297)	2021-01-23	0.643674	0.999995	0	0	0.991127	0.436654	PAPD7
positive regulation of cell cycle G1/S phase transition (GO:1902808)	2021-01-23	0.643674	0.999995	0	0	0.991127	0.436654	AIF1
microtubule polymerization or depolymerization (GO:0031109)	2021-01-23	0.643674	0.999995	0	0	0.991127	0.436654	KIF2A
cell-cell adhesion mediated by cadherin (GO:0044331)	2021-01-23	0.643674	0.999995	0	0	0.991127	0.436654	CDH6
regulation of transcription elongation from RNA polymerase II promoter (GO:0034243)	2021-01-23	0.643674	0.999995	0	0	0.991127	0.436654	SUPT4H1
positive regulation of protein oligomerization (GO:0032461)	2021-01-23	0.643674	0.999995	0	0	0.991127	0.436654	TP53
cellular amino acid catabolic process (GO:0009063)	2021-01-23	0.643674	0.999995	0	0	0.991127	0.436654	ALDH5A1
zinc II ion transmembrane transport (GO:0071577)	2021-01-23	0.643674	0.999995	0	0	0.991127	0.436654	SLC30A5
glutamine family amino acid metabolic process (GO:0009064)	2021-01-23	0.643674	0.999995	0	0	0.991127	0.436654	ALDH5A1
vitamin transport (GO:0051180)	2021-01-23	0.643674	0.999995	0	0	0.991127	0.436654	CD320
membrane assembly (GO:0071709)	2021-01-23	0.643674	0.999995	0	0	0.991127	0.436654	S100A10
negative regulation of signal transduction in absence of ligand (GO:1901099)	2021-01-23	0.643674	0.999995	0	0	0.991127	0.436654	TNF
folic acid-containing compound metabolic process (GO:0006760)	2021-01-23	0.643674	0.999995	0	0	0.991127	0.436654	MTRR
negative regulation of extrinsic apoptotic signaling pathway in absence of ligand (GO:2001240)	2021-01-23	0.643674	0.999995	0	0	0.991127	0.436654	TNF
rRNA methylation (GO:0031167)	2021-01-23	0.643674	0.999995	0	0	0.991127	0.436654	FBL
regulation of cell size (GO:0008361)	2021-01-23	0.643674	0.999995	0	0	0.991127	0.436654	EDN1
regulation of androgen receptor signaling pathway (GO:0060765)	2021-01-23	0.643674	0.999995	0	0	0.991127	0.436654	PRMT2
positive regulation of cell junction assembly (GO:1901890)	2021-01-23	0.643674	0.999995	0	0	0.991127	0.436654	S100A10
NAD metabolic process (GO:0019674)	2021-01-23	0.643674	0.999995	0	0	0.991127	0.436654	NT5E
regulation of ion homeostasis (GO:2000021)	2021-01-23	0.643674	0.999995	0	0	0.991127	0.436654	SLC30A5
cAMP-mediated signaling (GO:0019933)	1975-03-01	0.644621	0.999995	0	0	0.908228	0.398797	PTGER4;NDUFS4;ADCY2
heart morphogenesis (GO:0003007)	1950-02-01	0.650493	0.999995	0	0	0.908333	0.390605	NIPBL;ISL1
double-strand break repair via nonhomologous end joining (GO:0006303)	1950-02-01	0.650493	0.999995	0	0	0.908333	0.390605	HIST1H4A;UBE2V2
regulation of protein ubiquitination (GO:0031396)	4/101	0.651713	0.999995	0	0	0.898714	0.384785	NDFIP1;FBXO4;RPS3;SOX4
negative regulation of extrinsic apoptotic signaling pathway (GO:2001237)	1976-03-01	0.653498	0.999995	0	0	0.89574	0.381062	GSTP1;RIPK1;TNF
rRNA metabolic process (GO:0016072)	8/200	0.654468	0.999995	0	0	0.9077	0.384803	NOP56;FBL;RPL18A;RPLP0;RPS3;RPP21;RIOK1;RPL18
positive regulation of histone methylation (GO:0031062)	2021-01-24	0.659317	0.999995	0	0	0.947985	0.394884	JARID2
positive regulation of microtubule polymerization (GO:0031116)	2021-01-24	0.659317	0.999995	0	0	0.947985	0.394884	RPS3
positive regulation of immune effector process (GO:0002699)	2021-01-24	0.659317	0.999995	0	0	0.947985	0.394884	TRIM15
ear morphogenesis (GO:0042471)	2021-01-24	0.659317	0.999995	0	0	0.947985	0.394884	NIPBL
negative regulation of G1/S transition of mitotic cell cycle (GO:2000134)	2021-01-24	0.659317	0.999995	0	0	0.947985	0.394884	PRMT2
regulation of actin filament bundle assembly (GO:0032231)	2021-01-24	0.659317	0.999995	0	0	0.947985	0.394884	PTGER4
positive regulation of DNA-templated transcription, elongation (GO:0032786)	2021-01-24	0.659317	0.999995	0	0	0.947985	0.394884	SUPT4H1
positive regulation of microtubule polymerization or depolymerization (GO:0031112)	2021-01-24	0.659317	0.999995	0	0	0.947985	0.394884	RPS3
DNA geometric change (GO:0032392)	2021-01-24	0.659317	0.999995	0	0	0.947985	0.394884	TP53
regulation of chemotaxis (GO:0050920)	2021-01-24	0.659317	0.999995	0	0	0.947985	0.394884	ZSWIM6
negative regulation of oxidative stress-induced cell death (GO:1903202)	2021-01-24	0.659317	0.999995	0	0	0.947985	0.394884	SOD2
positive regulation of vascular endothelial growth factor production (GO:0010575)	2021-01-24	0.659317	0.999995	0	0	0.947985	0.394884	ISL1
negative regulation of interleukin-6 production (GO:0032715)	2021-01-24	0.659317	0.999995	0	0	0.947985	0.394884	TNF
protein alpha-1,2-demannosylation (GO:0036508)	2021-01-24	0.659317	0.999995	0	0	0.947985	0.394884	2021-03-06
regulation of cardiac muscle cell action potential (GO:0098901)	2021-01-24	0.659317	0.999995	0	0	0.947985	0.394884	DSP
transition metal ion homeostasis (GO:0055076)	2021-01-24	0.659317	0.999995	0	0	0.947985	0.394884	HFE
negative regulation of proteasomal ubiquitin-dependent protein catabolic process (GO:0032435)	2021-01-24	0.659317	0.999995	0	0	0.947985	0.394884	HFE
cGMP biosynthetic process (GO:0006182)	2021-01-24	0.659317	0.999995	0	0	0.947985	0.394884	ADCY2
cytoplasmic pattern recognition receptor signaling pathway (GO:0002753)	2021-01-24	0.659317	0.999995	0	0	0.947985	0.394884	CYLD
regulation of cell cycle G1/S phase transition (GO:1902806)	2021-01-24	0.659317	0.999995	0	0	0.947985	0.394884	TMEM14B
cAMP metabolic process (GO:0046058)	2021-01-24	0.659317	0.999995	0	0	0.947985	0.394884	ADCY2
regulation of cellular senescence (GO:2000772)	2021-01-24	0.659317	0.999995	0	0	0.947985	0.394884	ZKSCAN3
negative regulation of neuron projection development (GO:0010977)	1951-02-01	0.661188	0.999995	0	0	0.889749	0.368104	MYLIP;CIB1
carboxylic acid transport (GO:0046942)	1951-02-01	0.661188	0.999995	0	0	0.889749	0.368104	SLC6A19;SLC6A18
regulation of telomere maintenance via telomerase (GO:0032210)	1951-02-01	0.661188	0.999995	0	0	0.889749	0.368104	FBXO4;CCT5
coenzyme metabolic process (GO:0006732)	1951-02-01	0.661188	0.999995	0	0	0.889749	0.368104	PPCS;ACOT13
ribosome biogenesis (GO:0042254)	9/226	0.663128	0.999995	0	0	0.903364	0.371091	NOP56;FBL;RPL18A;PAK1IP1;RPLP0;RPS3;RPP21;RIOK1;RPL18
ncRNA processing (GO:0034470)	9/227	0.668225	0.999995	0	0	0.899172	0.362484	NOP56;FBL;RPL18A;RPLP0;RPS3;RPP21;RIOK1;RPL18;FARS2
negative regulation of inflammatory response (GO:0050728)	1978-03-01	0.670773	0.999995	0	0	0.871762	0.348116	PTGER4;GSTP1;ISL1
positive regulation of proteolysis (GO:0045862)	1952-02-01	0.671618	0.999995	0	0	0.871909	0.347077	TNF;NKD2
chemokine-mediated signaling pathway (GO:0070098)	1952-02-01	0.671618	0.999995	0	0	0.871909	0.347077	FOXC1;CIB1
positive regulation of mitotic cell cycle (GO:0045931)	1952-02-01	0.671618	0.999995	0	0	0.871909	0.347077	EDN1;CCNB1
peptide metabolic process (GO:0006518)	4/104	0.674243	0.999995	0	0	0.871615	0.343559	NLN;ALDH5A1;HM13;GSTP1
heterotypic cell-cell adhesion (GO:0034113)	2021-01-25	0.674274	0.999995	0	0	0.908438	0.358033	DSP
negative regulation of wound healing (GO:0061045)	2021-01-25	0.674274	0.999995	0	0	0.908438	0.358033	EDN1
signal peptide processing (GO:0006465)	2021-01-25	0.674274	0.999995	0	0	0.908438	0.358033	HM13
protein import into nucleus, translocation (GO:0000060)	2021-01-25	0.674274	0.999995	0	0	0.908438	0.358033	TNF
glial cell differentiation (GO:0010001)	2021-01-25	0.674274	0.999995	0	0	0.908438	0.358033	SOX4
nucleotide-binding domain, leucine rich repeat containing receptor signaling pathway (GO:0035872)	2021-01-25	0.674274	0.999995	0	0	0.908438	0.358033	CYLD
cyclic nucleotide metabolic process (GO:0009187)	2021-01-25	0.674274	0.999995	0	0	0.908438	0.358033	ADCY2
inorganic cation import across plasma membrane (GO:0098659)	2021-01-25	0.674274	0.999995	0	0	0.908438	0.358033	HFE
neutral amino acid transport (GO:0015804)	2021-01-25	0.674274	0.999995	0	0	0.908438	0.358033	SLC6A19
prostaglandin metabolic process (GO:0006693)	2021-01-25	0.674274	0.999995	0	0	0.908438	0.358033	EDN1
positive regulation of nuclear division (GO:0051785)	2021-01-25	0.674274	0.999995	0	0	0.908438	0.358033	EDN1
positive regulation of leukocyte mediated cytotoxicity (GO:0001912)	2021-01-25	0.674274	0.999995	0	0	0.908438	0.358033	HLA-E
monocarboxylic acid catabolic process (GO:0072329)	2021-01-25	0.674274	0.999995	0	0	0.908438	0.358033	ALDH5A1
positive regulation of glucose transport (GO:0010828)	2021-01-25	0.674274	0.999995	0	0	0.908438	0.358033	PIK3R1
negative regulation of cellular protein localization (GO:1903828)	2021-01-25	0.674274	0.999995	0	0	0.908438	0.358033	TRIM40
cellular response to vascular endothelial growth factor stimulus (GO:0035924)	2021-01-25	0.674274	0.999995	0	0	0.908438	0.358033	FOXC1
female gamete generation (GO:0007292)	2021-01-25	0.674274	0.999995	0	0	0.908438	0.358033	TRIP13
peptide hormone secretion (GO:0030072)	2021-01-25	0.674274	0.999995	0	0	0.908438	0.358033	EDN1
protein depolymerization (GO:0051261)	2021-01-25	0.674274	0.999995	0	0	0.908438	0.358033	KIF2A
3'-phosphoadenosine 5'-phosphosulfate metabolic process (GO:0050427)	2021-01-25	0.674274	0.999995	0	0	0.908438	0.358033	SULT1A4
peptidyl-tyrosine dephosphorylation (GO:0035335)	2021-01-25	0.674274	0.999995	0	0	0.908438	0.358033	PTPRF
positive regulation of embryonic development (GO:0040019)	2021-01-25	0.674274	0.999995	0	0	0.908438	0.358033	PHLDB1
L-amino acid transport (GO:0015807)	2021-01-25	0.674274	0.999995	0	0	0.908438	0.358033	SLC1A3
signal transduction in response to DNA damage (GO:0042770)	2021-01-25	0.674274	0.999995	0	0	0.908438	0.358033	TP53
negative regulation of mitotic cell cycle phase transition (GO:1901991)	1979-03-01	0.67917	0.999995	0	0	0.860246	0.332815	PSMD7;PRMT2;FBXL7
anaphase-promoting complex-dependent catabolic process (GO:0031145)	1979-03-01	0.67917	0.999995	0	0	0.860246	0.332815	CCNB1;PSMD7;SKP2
cell-cell junction assembly (GO:0007043)	1979-03-01	0.67917	0.999995	0	0	0.860246	0.332815	CDH6;OCLN;MARVELD2
translational elongation (GO:0006414)	4/105	0.681525	0.999995	0	0	0.86294	0.33087	MRPS25;MRPS36;MRPS18B;MRPS30
positive regulation of protein import into nucleus (GO:0042307)	1953-02-01	0.681786	0.999995	0	0	0.854768	0.327409	PIK3R1;BMP6
positive regulation of tyrosine phosphorylation of STAT protein (GO:0042531)	1953-02-01	0.681786	0.999995	0	0	0.854768	0.327409	GHR;IL31RA
positive regulation of signal transduction (GO:0009967)	8/206	0.686493	0.999995	0	0	0.879915	0.330988	UNC13B;CD63;TRIM39;RPS3;LY86;PIK3R1;SOX4;BMP6
negative regulation of defense response (GO:0031348)	1980-03-01	0.687407	0.999995	0	0	0.84903	0.31824	PTGER4;PCBP2;ISL1
positive regulation of glucose import (GO:0046326)	2021-01-26	0.688575	0.999995	0	0	0.872055	0.325391	PIK3R1
positive regulation of synapse assembly (GO:0051965)	2021-01-26	0.688575	0.999995	0	0	0.872055	0.325391	CLSTN1
cytoskeleton-dependent intracellular transport (GO:0030705)	2021-01-26	0.688575	0.999995	0	0	0.872055	0.325391	TUBB
response to gamma radiation (GO:0010332)	2021-01-26	0.688575	0.999995	0	0	0.872055	0.325391	TP53
nucleotide biosynthetic process (GO:0009165)	2021-01-26	0.688575	0.999995	0	0	0.872055	0.325391	ADCY2
regulation of pri-miRNA transcription from RNA polymerase II promoter (GO:1902893)	2021-01-26	0.688575	0.999995	0	0	0.872055	0.325391	TP53
positive regulation of wound healing (GO:0090303)	2021-01-26	0.688575	0.999995	0	0	0.872055	0.325391	RREB1
regulation of cardiac muscle cell contraction (GO:0086004)	2021-01-26	0.688575	0.999995	0	0	0.872055	0.325391	DSP
positive regulation of release of cytochrome c from mitochondria (GO:0090200)	2021-01-26	0.688575	0.999995	0	0	0.872055	0.325391	TP53
regulation of T cell receptor signaling pathway (GO:0050856)	2021-01-26	0.688575	0.999995	0	0	0.872055	0.325391	RPS3
response to endoplasmic reticulum stress (GO:0034976)	4/106	0.688692	0.999995	0	0	0.854435	0.318671	PIK3R1;MARCH6;TP53;TTC23L
RNA modification (GO:0009451)	1954-02-01	0.691695	0.999995	0	0	0.838286	0.309	NOP56;CDKAL1
positive regulation of binding (GO:0051099)	1981-03-01	0.695485	0.999995	0	0	0.838101	0.304352	FOXC1;HFE;GMNN
protein catabolic process (GO:0030163)	1981-03-01	0.695485	0.999995	0	0	0.838101	0.304352	PRSS16;RIPK1;MARCH6
positive regulation of cell cycle process (GO:0090068)	4/107	0.695744	0.999995	0	0	0.846095	0.306941	CCNB1;EDN1;TP53;RXFP3
negative regulation of response to external stimulus (GO:0032102)	4/107	0.695744	0.999995	0	0	0.846095	0.306941	PTGER4;NFKBIL1;PCBP2;ISL1
regulation of gene silencing by RNA (GO:0060966)	1955-02-01	0.701348	0.999995	0	0	0.822426	0.291756	HIST1H4A;HIST1H3A
regulation of posttranscriptional gene silencing (GO:0060147)	1955-02-01	0.701348	0.999995	0	0	0.822426	0.291756	HIST1H4A;HIST1H3A
positive regulation of DNA biosynthetic process (GO:2000573)	1955-02-01	0.701348	0.999995	0	0	0.822426	0.291756	FBXO4;CCT5
regulation of intracellular steroid hormone receptor signaling pathway (GO:0033143)	2021-01-27	0.702248	0.999995	0	0	0.83847	0.296373	PRMT2
phosphatidylinositol phosphorylation (GO:0046854)	2021-01-27	0.702248	0.999995	0	0	0.83847	0.296373	PIK3R1
regulation of cilium assembly (GO:1902017)	2021-01-27	0.702248	0.999995	0	0	0.83847	0.296373	CYLD
negative regulation of smooth muscle cell proliferation (GO:0048662)	2021-01-27	0.702248	0.999995	0	0	0.83847	0.296373	AIF1
leukocyte cell-cell adhesion (GO:0007159)	2021-01-27	0.702248	0.999995	0	0	0.83847	0.296373	NT5E
negative regulation of microtubule polymerization or depolymerization (GO:0031111)	2021-01-27	0.702248	0.999995	0	0	0.83847	0.296373	CIB1
regulation of protein localization to nucleus (GO:1900180)	2021-01-27	0.702248	0.999995	0	0	0.83847	0.296373	TRIM40
regulation of extrinsic apoptotic signaling pathway in absence of ligand (GO:2001239)	2021-01-27	0.702248	0.999995	0	0	0.83847	0.296373	TNF
transition metal ion transport (GO:0000041)	2021-01-27	0.702248	0.999995	0	0	0.83847	0.296373	SLC30A5
extrinsic apoptotic signaling pathway via death domain receptors (GO:0008625)	2021-01-27	0.702248	0.999995	0	0	0.83847	0.296373	TNF
regulation of vascular endothelial growth factor production (GO:0010574)	2021-01-27	0.702248	0.999995	0	0	0.83847	0.296373	ISL1
DNA-templated transcription, elongation (GO:0006354)	4/108	0.702681	0.999995	0	0	0.837915	0.29566	CDK7;ZNRD1;SUPT4H1;GTF2H4
DNA damage response, signal transduction by p53 class mediator (GO:0030330)	1982-03-01	0.703404	0.999995	0	0	0.827448	0.291116	CCNB1;TP53;SOX4
mitotic sister chromatid segregation (GO:0000070)	1982-03-01	0.703404	0.999995	0	0	0.827448	0.291116	NIPBL;CCNB1;PAPD7
positive regulation of cell cycle arrest (GO:0071158)	1982-03-01	0.703404	0.999995	0	0	0.827448	0.291116	CCNB1;TP53;SOX4
transcription initiation from RNA polymerase II promoter (GO:0006367)	6/160	0.708103	0.999995	0	0	0.84851	0.292876	RXRB;CCNB1;CDK7;MAZ;E2F3;GTF2H4
circulatory system development (GO:0072359)	4/109	0.709503	0.999995	0	0	0.829891	0.284811	NIPBL;FOXC1;ISL1;SOX4
cellular iron ion homeostasis (GO:0006879)	1956-02-01	0.710749	0.999995	0	0	0.807153	0.275591	NDFIP1;BMP6
DNA-templated transcription, initiation (GO:0006352)	7/186	0.71217	0.999995	0	0	0.851525	0.28904	RXRB;CCNB1;CDK7;ZNRD1;MAZ;E2F3;GTF2H4
regulation of vasculature development (GO:1901342)	2021-01-28	0.715322	0.999995	0	0	0.807374	0.270488	ERBB2
negative regulation of intracellular steroid hormone receptor signaling pathway (GO:0033144)	2021-01-28	0.715322	0.999995	0	0	0.807374	0.270488	ISL1
cellular response to hydrogen peroxide (GO:0070301)	2021-01-28	0.715322	0.999995	0	0	0.807374	0.270488	RPS3
hydrogen ion transmembrane transport (GO:1902600)	2021-01-28	0.715322	0.999995	0	0	0.807374	0.270488	NNT
cellular response to alcohol (GO:0097306)	2021-01-28	0.715322	0.999995	0	0	0.807374	0.270488	PTGER4
carboxylic acid catabolic process (GO:0046395)	2021-01-28	0.715322	0.999995	0	0	0.807374	0.270488	ABHD10
negative regulation of proteasomal protein catabolic process (GO:1901799)	2021-01-28	0.715322	0.999995	0	0	0.807374	0.270488	HFE
negative regulation of response to DNA damage stimulus (GO:2001021)	2021-01-28	0.715322	0.999995	0	0	0.807374	0.270488	RPS3
regulation of mRNA processing (GO:0050684)	2021-01-28	0.715322	0.999995	0	0	0.807374	0.270488	PABPN1
regulation of receptor internalization (GO:0002090)	2021-01-28	0.715322	0.999995	0	0	0.807374	0.270488	CD63
positive regulation of sprouting angiogenesis (GO:1903672)	2021-01-28	0.715322	0.999995	0	0	0.807374	0.270488	CIB1
lytic vacuole organization (GO:0080171)	2021-01-28	0.715322	0.999995	0	0	0.807374	0.270488	ZKSCAN3
negative regulation of JNK cascade (GO:0046329)	2021-01-28	0.715322	0.999995	0	0	0.807374	0.270488	GSTP1
positive regulation of calcium-mediated signaling (GO:0050850)	2021-01-28	0.715322	0.999995	0	0	0.807374	0.270488	CIB1
cGMP metabolic process (GO:0046068)	2021-01-28	0.715322	0.999995	0	0	0.807374	0.270488	ADCY2
regulation of defense response to virus by virus (GO:0050690)	2021-01-28	0.715322	0.999995	0	0	0.807374	0.270488	AP2B1
ventricular septum development (GO:0003281)	2021-01-28	0.715322	0.999995	0	0	0.807374	0.270488	SOX4
nucleotide-binding oligomerization domain containing signaling pathway (GO:0070423)	2021-01-28	0.715322	0.999995	0	0	0.807374	0.270488	CYLD
regulation of adenylate cyclase activity (GO:0045761)	2021-01-28	0.715322	0.999995	0	0	0.807374	0.270488	CAP2
protein K63-linked deubiquitination (GO:0070536)	2021-01-28	0.715322	0.999995	0	0	0.807374	0.270488	CYLD
positive regulation of fibroblast proliferation (GO:0048146)	2021-01-28	0.715322	0.999995	0	0	0.807374	0.270488	NDUFS4
viral gene expression (GO:0019080)	4/110	0.71621	0.999995	0	0	0.822019	0.274375	RPL18A;RPLP0;RPS3;RPL18
cellular response to molecule of bacterial origin (GO:0071219)	1984-03-01	0.718768	0.999995	0	0	0.806933	0.266462	PABPN1;NFKBIL1;GSTP1
positive regulation of cell death (GO:0010942)	1957-02-01	0.719901	0.999995	0	0	0.792436	0.260428	RIPK1;TNF
DNA repair (GO:0006281)	11/288	0.722358	0.999995	0	0	0.8642	0.281068	NIPBL;GTF2H2C;PAPD7;RPS3;UBE2V2;RAD17;CIB1;WRNIP1;TRIP13;TP53;GTF2H4
positive regulation of I-kappaB kinase/NF-kappaB signaling (GO:0043123)	6/163	0.724695	0.999995	0	0	0.832165	0.26796	NDFIP1;TSPAN6;C18ORF32;RIPK1;TRIM38;TNF
regulation of type I interferon production (GO:0032479)	1985-03-01	0.726216	0.999995	0	0	0.79705	0.254983	CYLD;PCBP2;TRIM15
dicarboxylic acid transport (GO:0006835)	2021-01-29	0.727823	0.999995	0	0	0.778498	0.247327	SLC1A3
collagen fibril organization (GO:0030199)	2021-01-29	0.727823	0.999995	0	0	0.778498	0.247327	COL11A2
TRIF-dependent toll-like receptor signaling pathway (GO:0035666)	2021-01-29	0.727823	0.999995	0	0	0.778498	0.247327	RIPK1
superoxide metabolic process (GO:0006801)	2021-01-29	0.727823	0.999995	0	0	0.778498	0.247327	SOD2
cortical cytoskeleton organization (GO:0030865)	2021-01-29	0.727823	0.999995	0	0	0.778498	0.247327	TNF
positive regulation of transcription from RNA polymerase II promoter in response to stress (GO:0036003)	2021-01-29	0.727823	0.999995	0	0	0.778498	0.247327	TP53
regulation of keratinocyte differentiation (GO:0045616)	2021-01-29	0.727823	0.999995	0	0	0.778498	0.247327	FOXC1
coenzyme biosynthetic process (GO:0009108)	2021-01-29	0.727823	0.999995	0	0	0.778498	0.247327	PPCS
B cell proliferation (GO:0042100)	2021-01-29	0.727823	0.999995	0	0	0.778498	0.247327	GAPT
MyD88-dependent toll-like receptor signaling pathway (GO:0002755)	2021-01-29	0.727823	0.999995	0	0	0.778498	0.247327	MAP3K1
skeletal muscle organ development (GO:0060538)	2021-01-29	0.727823	0.999995	0	0	0.778498	0.247327	BASP1
respiratory system development (GO:0060541)	2021-01-29	0.727823	0.999995	0	0	0.778498	0.247327	BASP1
regulation of cellular biosynthetic process (GO:0031326)	2021-01-29	0.727823	0.999995	0	0	0.778498	0.247327	SIRT5
nuclear-transcribed mRNA catabolic process, nonsense-mediated decay (GO:0000184)	4/112	0.729281	0.999995	0	0	0.806712	0.254675	RPL18A;RPLP0;RPS3;RPL18
toll-like receptor signaling pathway (GO:0002224)	1986-03-01	0.733507	0.999995	0	0	0.787406	0.244031	MAP3K1;LRRC70;RIPK1
viral transcription (GO:0019083)	4/113	0.735646	0.999995	0	0	0.799269	0.245381	RPL18A;RPLP0;RPS3;RPL18
positive regulation of developmental process (GO:0051094)	4/113	0.735646	0.999995	0	0	0.799269	0.245381	TNF;ISL1;HLA-G;RREB1
renal system development (GO:0072001)	1959-02-01	0.737472	0.999995	0	0	0.764551	0.232827	FOXC1;ITGB4
cell junction assembly (GO:0034329)	1959-02-01	0.737472	0.999995	0	0	0.764551	0.232827	CDH6;ACTG1
regulation of pathway-restricted SMAD protein phosphorylation (GO:0060393)	1959-02-01	0.737472	0.999995	0	0	0.764551	0.232827	HFE;BMP6
cell morphogenesis (GO:0000902)	1959-02-01	0.737472	0.999995	0	0	0.764551	0.232827	CDH6;CAP2
ribosomal large subunit assembly (GO:0000027)	2021-01-30	0.739775	0.999995	0	0	0.751614	0.226543	BRIX1
regulation of protein insertion into mitochondrial membrane involved in apoptotic signaling pathway (GO:1900739)	2021-01-30	0.739775	0.999995	0	0	0.751614	0.226543	TP53
smoothened signaling pathway (GO:0007224)	2021-01-30	0.739775	0.999995	0	0	0.751614	0.226543	DYRK2
regulation of cell migration involved in sprouting angiogenesis (GO:0090049)	2021-01-30	0.739775	0.999995	0	0	0.751614	0.226543	CIB1
regulation of defense response to virus by host (GO:0050691)	2021-01-30	0.739775	0.999995	0	0	0.751614	0.226543	MICB
beta-catenin-TCF complex assembly (GO:1904837)	2021-01-30	0.739775	0.999995	0	0	0.751614	0.226543	HIST1H4A
connective tissue development (GO:0061448)	2021-01-30	0.739775	0.999995	0	0	0.751614	0.226543	COL11A2
cellular response to drug (GO:0035690)	2021-01-30	0.739775	0.999995	0	0	0.751614	0.226543	TP53
negative regulation of transferase activity (GO:0051348)	2021-01-30	0.739775	0.999995	0	0	0.751614	0.226543	TP53
cyclic purine nucleotide metabolic process (GO:0052652)	2021-01-30	0.739775	0.999995	0	0	0.751614	0.226543	ADCY2
negative regulation of DNA biosynthetic process (GO:2000279)	2021-01-30	0.739775	0.999995	0	0	0.751614	0.226543	TP53
activation of JUN kinase activity (GO:0007257)	2021-01-30	0.739775	0.999995	0	0	0.751614	0.226543	RIPK1
regulation of cell adhesion mediated by integrin (GO:0033628)	2021-01-30	0.739775	0.999995	0	0	0.751614	0.226543	CIB1
regulation of cation transmembrane transport (GO:1904062)	2021-01-30	0.739775	0.999995	0	0	0.751614	0.226543	CD63
regulation of ARF protein signal transduction (GO:0032012)	2021-01-30	0.739775	0.999995	0	0	0.751614	0.226543	SMAP1
MyD88-independent toll-like receptor signaling pathway (GO:0002756)	2021-01-30	0.739775	0.999995	0	0	0.751614	0.226543	RIPK1
regulation of intracellular estrogen receptor signaling pathway (GO:0033146)	2021-01-30	0.739775	0.999995	0	0	0.751614	0.226543	ISL1
positive regulation of protein insertion into mitochondrial membrane involved in apoptotic signaling pathway (GO:1900740)	2021-01-30	0.739775	0.999995	0	0	0.751614	0.226543	TP53
regulation of blood coagulation (GO:0030193)	2021-01-30	0.739775	0.999995	0	0	0.751614	0.226543	EDN1
positive regulation of B cell proliferation (GO:0030890)	2021-01-30	0.739775	0.999995	0	0	0.751614	0.226543	CD320
central nervous system development (GO:0007417)	8/217	0.740173	0.999995	0	0	0.83312	0.250661	NIPBL;ALDH5A1;QARS;MOG;GSTP1;NDUFS4;JARID2;SOX4
positive regulation of cellular component biogenesis (GO:0044089)	1987-03-01	0.740645	0.999995	0	0	0.777991	0.233579	CLSTN1;RPS3;TNF
regulation of stress fiber assembly (GO:0051492)	1960-02-01	0.745899	0.999995	0	0	0.75133	0.220264	PTGER4;S100A10
response to reactive oxygen species (GO:0000302)	1960-02-01	0.745899	0.999995	0	0	0.75133	0.220264	GSTP1;SOD2
T cell activation (GO:0042110)	1988-03-01	0.74763	0.999995	0	0	0.768798	0.223603	SOX4;MICA;MICB
regulation of stem cell differentiation (GO:2000736)	1988-03-01	0.74763	0.999995	0	0	0.768798	0.223603	HIST1H4A;PSMD7;HIST1H3A
divalent metal ion transport (GO:0070838)	1988-03-01	0.74763	0.999995	0	0	0.768798	0.223603	MRS2;SLC30A5;ATP2A3
negative regulation of toll-like receptor signaling pathway (GO:0034122)	2021-01-31	0.751203	0.999995	0	0	0.726522	0.207843	NFKBIL1
regulation of glucose import (GO:0046324)	2021-01-31	0.751203	0.999995	0	0	0.726522	0.207843	PIK3R1
positive regulation of protein dephosphorylation (GO:0035307)	2021-01-31	0.751203	0.999995	0	0	0.726522	0.207843	ITGA1
renal water homeostasis (GO:0003091)	2021-01-31	0.751203	0.999995	0	0	0.726522	0.207843	ADCY2
zinc ion homeostasis (GO:0055069)	2021-01-31	0.751203	0.999995	0	0	0.726522	0.207843	SLC30A5
negative regulation of extrinsic apoptotic signaling pathway via death domain receptors (GO:1902042)	2021-01-31	0.751203	0.999995	0	0	0.726522	0.207843	RIPK1
cofactor biosynthetic process (GO:0051188)	2021-01-31	0.751203	0.999995	0	0	0.726522	0.207843	PPCS
positive regulation of interleukin-1 beta production (GO:0032731)	2021-01-31	0.751203	0.999995	0	0	0.726522	0.207843	ISL1
cellular zinc ion homeostasis (GO:0006882)	2021-01-31	0.751203	0.999995	0	0	0.726522	0.207843	SLC30A5
lysosome organization (GO:0007040)	2021-01-31	0.751203	0.999995	0	0	0.726522	0.207843	ZKSCAN3
positive regulation of bone mineralization (GO:0030501)	2021-01-31	0.751203	0.999995	0	0	0.726522	0.207843	BMP6
proton transport (GO:0015992)	2021-01-31	0.751203	0.999995	0	0	0.726522	0.207843	NNT
regulation of tyrosine phosphorylation of STAT protein (GO:0042509)	1961-02-01	0.754093	0.999995	0	0	0.738557	0.20845	GHR;IL31RA
regulation of cellular ketone metabolic process (GO:0010565)	1961-02-01	0.754093	0.999995	0	0	0.738557	0.20845	PSMD7;SIRT5
regulation of DNA replication (GO:0006275)	1961-02-01	0.754093	0.999995	0	0	0.738557	0.20845	GMNN;RAD17
regulation of neuron apoptotic process (GO:0043523)	1989-03-01	0.754464	0.999995	0	0	0.759819	0.214077	SOD2;ISL1;TP53
regulation of cytokine-mediated signaling pathway (GO:0001959)	1990-03-01	0.761148	0.999995	0	0	0.751046	0.204981	CYLD;RIPK1;TNF
negative regulation of G2/M transition of mitotic cell cycle (GO:0010972)	1962-02-01	0.762059	0.999995	0	0	0.72621	0.197334	PSMD7;FBXL7
cellular amide metabolic process (GO:0043603)	1962-02-01	0.762059	0.999995	0	0	0.72621	0.197334	GHR;NLN
response to zinc ion (GO:0010043)	1932-01-01	0.76213	0.999995	0	0	0.703049	0.190975	SLC30A5
cellular response to glucagon stimulus (GO:0071377)	1932-01-01	0.76213	0.999995	0	0	0.703049	0.190975	ADCY2
oxoacid metabolic process (GO:0043436)	1932-01-01	0.76213	0.999995	0	0	0.703049	0.190975	SULT1A4
regulation of potassium ion transmembrane transport (GO:1901379)	1932-01-01	0.76213	0.999995	0	0	0.703049	0.190975	CD63
negative regulation of receptor activity (GO:2000272)	1932-01-01	0.76213	0.999995	0	0	0.703049	0.190975	HFE
positive regulation of T cell differentiation (GO:0045582)	1932-01-01	0.76213	0.999995	0	0	0.703049	0.190975	HLA-G
positive regulation of protein serine/threonine kinase activity (GO:0071902)	4/118	0.765779	0.999995	0	0	0.764012	0.203886	EDN1;ERBB2;CIB1;TNF
negative regulation of protein modification process (GO:0031400)	1963-02-01	0.769799	0.999995	0	0	0.714267	0.18687	PPP1R11;CIB1
oligosaccharide metabolic process (GO:0009311)	1963-02-01	0.769799	0.999995	0	0	0.714267	0.18687	GALNT4;POC1B-GALNT4
negative regulation of neuron apoptotic process (GO:0043524)	1963-02-01	0.769799	0.999995	0	0	0.714267	0.18687	SOD2;ISL1
ribosomal large subunit biogenesis (GO:0042273)	1963-02-01	0.769799	0.999995	0	0	0.714267	0.18687	PAK1IP1;BRIX1
positive regulation of cytokine-mediated signaling pathway (GO:0001961)	1933-01-01	0.772577	0.999995	0	0	0.681043	0.175725	EDN1
negative regulation of neurogenesis (GO:0050768)	1933-01-01	0.772577	0.999995	0	0	0.681043	0.175725	ID4
stem cell differentiation (GO:0048863)	1933-01-01	0.772577	0.999995	0	0	0.681043	0.175725	JARID2
regulation of cell-substrate adhesion (GO:0010810)	1933-01-01	0.772577	0.999995	0	0	0.681043	0.175725	GCNT2
platelet aggregation (GO:0070527)	1933-01-01	0.772577	0.999995	0	0	0.681043	0.175725	ACTG1
cellular response to glucose starvation (GO:0042149)	1933-01-01	0.772577	0.999995	0	0	0.681043	0.175725	TP53
embryonic organ morphogenesis (GO:0048562)	1933-01-01	0.772577	0.999995	0	0	0.681043	0.175725	NIPBL
positive regulation of catalytic activity (GO:0043085)	1933-01-01	0.772577	0.999995	0	0	0.681043	0.175725	CIB1
regulation of DNA recombination (GO:0000018)	1933-01-01	0.772577	0.999995	0	0	0.681043	0.175725	IL7R
positive regulation of biomineral tissue development (GO:0070169)	1933-01-01	0.772577	0.999995	0	0	0.681043	0.175725	BMP6
regulation of phosphatidylinositol 3-kinase activity (GO:0043551)	1933-01-01	0.772577	0.999995	0	0	0.681043	0.175725	PIK3R1
positive regulation of nucleocytoplasmic transport (GO:0046824)	1933-01-01	0.772577	0.999995	0	0	0.681043	0.175725	TP53
sensory perception of chemical stimulus (GO:0007606)	12/327	0.775506	0.999995	0	0	0.828318	0.210591	OR1F12;OR2I1P;OR14J1;OR2H2;OR2J3;OR2H1;OR2J2;OR2W6P;OR2J1;OR10C1;OR12D2;OR2B6
enzyme linked receptor protein signaling pathway (GO:0007167)	4/120	0.777056	0.999995	0	0	0.75076	0.189374	TRIO;ERBB2;IL31RA;PTPRF
positive regulation of JAK-STAT cascade (GO:0046427)	1964-02-01	0.777319	0.999995	0	0	0.70271	0.177015	GHR;IL31RA
glycerophospholipid metabolic process (GO:0006650)	1964-02-01	0.777319	0.999995	0	0	0.70271	0.177015	ALDH5A1;PRDX6
cellular transition metal ion homeostasis (GO:0046916)	1993-03-01	0.780318	0.999995	0	0	0.725896	0.180062	NDFIP1;SLC30A5;BMP6
proteolysis involved in cellular protein catabolic process (GO:0051603)	1993-03-01	0.780318	0.999995	0	0	0.725896	0.180062	HM13;GZMA;MARCH6
regulation of double-strand break repair (GO:2000779)	1934-01-01	0.782566	0.999995	0	0	0.660371	0.161908	WDR70
embryonic limb morphogenesis (GO:0030326)	1934-01-01	0.782566	0.999995	0	0	0.660371	0.161908	NIPBL
apoptotic mitochondrial changes (GO:0008637)	1934-01-01	0.782566	0.999995	0	0	0.660371	0.161908	SOD2
positive regulation of leukocyte migration (GO:0002687)	1934-01-01	0.782566	0.999995	0	0	0.660371	0.161908	TNF
ncRNA metabolic process (GO:0034660)	1934-01-01	0.782566	0.999995	0	0	0.660371	0.161908	DDX4
positive regulation of cytokinesis (GO:0032467)	1934-01-01	0.782566	0.999995	0	0	0.660371	0.161908	RXFP3
bone development (GO:0060348)	1934-01-01	0.782566	0.999995	0	0	0.660371	0.161908	PTGER4
negative regulation of T cell activation (GO:0050868)	1934-01-01	0.782566	0.999995	0	0	0.660371	0.161908	HLA-G
positive regulation of cell development (GO:0010720)	1934-01-01	0.782566	0.999995	0	0	0.660371	0.161908	EDN1
positive regulation of chemokine production (GO:0032722)	1934-01-01	0.782566	0.999995	0	0	0.660371	0.161908	TNF
response to glucagon (GO:0033762)	1934-01-01	0.782566	0.999995	0	0	0.660371	0.161908	ADCY2
anterior/posterior pattern specification (GO:0009952)	1934-01-01	0.782566	0.999995	0	0	0.660371	0.161908	BASP1
macromolecule catabolic process (GO:0009057)	1934-01-01	0.782566	0.999995	0	0	0.660371	0.161908	PRSS16
positive regulation of protein modification by small protein conjugation or removal (GO:1903322)	1965-02-01	0.784624	0.999995	0	0	0.691519	0.167729	NDFIP1;FBXO4
regulation of myeloid cell differentiation (GO:0045637)	1965-02-01	0.784624	0.999995	0	0	0.691519	0.167729	HIST1H4A;HIST1H3A
DNA synthesis involved in DNA repair (GO:0000731)	1965-02-01	0.784624	0.999995	0	0	0.691519	0.167729	PAPD7;WRNIP1
defense response to Gram-positive bacterium (GO:0050830)	1965-02-01	0.784624	0.999995	0	0	0.691519	0.167729	PPP1R11;HLA-E
skin development (GO:0043588)	1994-03-01	0.786419	0.999995	0	0	0.717882	0.172482	DSP;ITGB4;DHCR24
cellular response to light stimulus (GO:0071482)	1966-02-01	0.791716	0.999995	0	0	0.680679	0.158974	PAPD7;TP53
purine ribonucleotide metabolic process (GO:0009150)	1966-02-01	0.791716	0.999995	0	0	0.680679	0.158974	GMPR;SULT1A4
JNK cascade (GO:0007254)	1966-02-01	0.791716	0.999995	0	0	0.680679	0.158974	PTGER4;RIPK1
lipid phosphorylation (GO:0046834)	1935-01-01	0.792116	0.999995	0	0	0.640915	0.149363	PIK3R1
regulation of cyclin-dependent protein kinase activity (GO:1904029)	1935-01-01	0.792116	0.999995	0	0	0.640915	0.149363	CDK7
regulation of heart rate by cardiac conduction (GO:0086091)	1935-01-01	0.792116	0.999995	0	0	0.640915	0.149363	DSP
antibacterial humoral response (GO:0019731)	1935-01-01	0.792116	0.999995	0	0	0.640915	0.149363	HLA-E
negative regulation of cell-substrate adhesion (GO:0010812)	1935-01-01	0.792116	0.999995	0	0	0.640915	0.149363	GCNT2
negative regulation of protein kinase B signaling (GO:0051898)	1935-01-01	0.792116	0.999995	0	0	0.640915	0.149363	CIB1
regulation of microtubule polymerization (GO:0031113)	1935-01-01	0.792116	0.999995	0	0	0.640915	0.149363	RPS3
positive regulation of DNA replication (GO:0045740)	1935-01-01	0.792116	0.999995	0	0	0.640915	0.149363	BMP6
negative regulation of protein complex assembly (GO:0031333)	1935-01-01	0.792116	0.999995	0	0	0.640915	0.149363	PTGER4
maturation of SSU-rRNA from tricistronic rRNA transcript (SSU-rRNA, 5.8S rRNA, LSU-rRNA) (GO:0000462)	1935-01-01	0.792116	0.999995	0	0	0.640915	0.149363	ABT1
cholesterol biosynthetic process (GO:0006695)	1935-01-01	0.792116	0.999995	0	0	0.640915	0.149363	DHCR24
regulation of synapse assembly (GO:0051963)	1935-01-01	0.792116	0.999995	0	0	0.640915	0.149363	CLSTN1
membrane protein proteolysis (GO:0033619)	1935-01-01	0.792116	0.999995	0	0	0.640915	0.149363	HM13
actin filament bundle organization (GO:0061572)	1935-01-01	0.792116	0.999995	0	0	0.640915	0.149363	AIF1
positive regulation of osteoblast differentiation (GO:0045669)	1935-01-01	0.792116	0.999995	0	0	0.640915	0.149363	BMP6
protein kinase B signaling (GO:0043491)	1935-01-01	0.792116	0.999995	0	0	0.640915	0.149363	TNF
transcription elongation from RNA polymerase II promoter (GO:0006368)	1995-03-01	0.79238	0.999995	0	0	0.710041	0.165237	CDK7;SUPT4H1;GTF2H4
regulation of cytoskeleton organization (GO:0051493)	1995-03-01	0.79238	0.999995	0	0	0.710041	0.165237	ATAT1;CYLD;PHLDB1
tumor necrosis factor-mediated signaling pathway (GO:0033209)	4/123	0.793162	0.999995	0	0	0.731718	0.169559	PSMD7;LTA;RIPK1;TNF
positive regulation of apoptotic process (GO:0043065)	11/307	0.793855	0.999995	0	0	0.807912	0.18651	UNC13B;GZMK;TRIO;PRMT2;TRIM39;GZMA;RPS3;RIPK1;TP53;TNF;SOX4
regulation of I-kappaB kinase/NF-kappaB signaling (GO:0043122)	7/204	0.795696	0.999995	0	0	0.772986	0.176657	NDFIP1;TSPAN6;GSTP1;C18ORF32;RIPK1;TRIM38;TNF
ciliary basal body-plasma membrane docking (GO:0097711)	1996-03-01	0.798201	0.999995	0	0	0.70237	0.15831	TUBB;CEP72;TUBB4B
regulation of gene silencing by miRNA (GO:0060964)	1967-02-01	0.798602	0.999995	0	0	0.670171	0.150716	HIST1H4A;HIST1H3A
positive regulation of synaptic transmission (GO:0050806)	1967-02-01	0.798602	0.999995	0	0	0.670171	0.150716	UNC13B;CLSTN1
cellular response to UV (GO:0034644)	1967-02-01	0.798602	0.999995	0	0	0.670171	0.150716	PAPD7;TP53
positive regulation of programmed cell death (GO:0043068)	9/257	0.79881	0.999995	0	0	0.789147	0.177268	UNC13B;GZMK;TRIO;PRMT2;GZMA;RIPK1;TP53;TNF;SOX4
mRNA processing (GO:0006397)	10/283	0.799437	0.999995	0	0	0.796397	0.178271	CDK7;PABPN1;PCBP2;SUPT4H1;PPWD1;PRPF4B;SNRNP48;HNRNPH3;CWC27;GTF2H4
regulation of potassium ion transport (GO:0043266)	1936-01-01	0.801248	0.999995	0	0	0.62257	0.137952	CD63
regulation of nitric-oxide synthase activity (GO:0050999)	1936-01-01	0.801248	0.999995	0	0	0.62257	0.137952	NPR3
transferrin transport (GO:0033572)	1936-01-01	0.801248	0.999995	0	0	0.62257	0.137952	HFE
regulation of response to DNA damage stimulus (GO:2001020)	1936-01-01	0.801248	0.999995	0	0	0.62257	0.137952	UBE2V2
histone deacetylation (GO:0016575)	1936-01-01	0.801248	0.999995	0	0	0.62257	0.137952	MORF4L2
vesicle-mediated transport in synapse (GO:0099003)	1936-01-01	0.801248	0.999995	0	0	0.62257	0.137952	UNC13B
ferric iron transport (GO:0015682)	1936-01-01	0.801248	0.999995	0	0	0.62257	0.137952	HFE
cardiac muscle tissue morphogenesis (GO:0055008)	1936-01-01	0.801248	0.999995	0	0	0.62257	0.137952	ISL1
regulation of ubiquitin protein ligase activity (GO:1904666)	1936-01-01	0.801248	0.999995	0	0	0.62257	0.137952	CCNB1
negative regulation of blood coagulation (GO:0030195)	1936-01-01	0.801248	0.999995	0	0	0.62257	0.137952	EDN1
secondary alcohol biosynthetic process (GO:1902653)	1936-01-01	0.801248	0.999995	0	0	0.62257	0.137952	DHCR24
mRNA metabolic process (GO:0016071)	1997-03-01	0.803885	0.999995	0	0	0.694861	0.151687	PCBP2;SUPT4H1;TP53
response to tumor necrosis factor (GO:0034612)	1997-03-01	0.803885	0.999995	0	0	0.694861	0.151687	RPS3;CIB1;RIPK1
response to interferon-gamma (GO:0034341)	1968-02-01	0.805285	0.999995	0	0	0.659983	0.142925	AIF1;HLA-DPA1
termination of RNA polymerase II transcription (GO:0006369)	1968-02-01	0.805285	0.999995	0	0	0.659983	0.142925	PABPN1;MAZ
positive regulation of T cell activation (GO:0050870)	1968-02-01	0.805285	0.999995	0	0	0.659983	0.142925	AIF1;HLA-DPA1
regulation of insulin secretion (GO:0050796)	1998-03-01	0.809434	0.999995	0	0	0.687511	0.145353	TNF;ISL1;SOX4
positive regulation of cell growth (GO:0030307)	1998-03-01	0.809434	0.999995	0	0	0.687511	0.145353	EDN1;ERBB2;CIB1
epithelial to mesenchymal transition (GO:0001837)	1937-01-01	0.809979	0.999995	0	0	0.605245	0.127553	FOXF2
base-excision repair (GO:0006284)	1937-01-01	0.809979	0.999995	0	0	0.605245	0.127553	TP53
positive regulation of mitochondrial outer membrane permeabilization involved in apoptotic signaling pathway (GO:1901030)	1937-01-01	0.809979	0.999995	0	0	0.605245	0.127553	TP53
positive regulation of receptor activity (GO:2000273)	1937-01-01	0.809979	0.999995	0	0	0.605245	0.127553	HFE
protein K63-linked ubiquitination (GO:0070534)	1937-01-01	0.809979	0.999995	0	0	0.605245	0.127553	UBE2V2
regulation of osteoclast differentiation (GO:0045670)	1937-01-01	0.809979	0.999995	0	0	0.605245	0.127553	TNF
positive regulation of stress fiber assembly (GO:0051496)	1937-01-01	0.809979	0.999995	0	0	0.605245	0.127553	S100A10
actin filament bundle assembly (GO:0051017)	1937-01-01	0.809979	0.999995	0	0	0.605245	0.127553	AIF1
organic cyclic compound biosynthetic process (GO:1901362)	1937-01-01	0.809979	0.999995	0	0	0.605245	0.127553	SRD5A1
regulation of endocytosis (GO:0030100)	1969-02-01	0.811771	0.999995	0	0	0.650098	0.13557	CD63;CD151
negative regulation of cell cycle G2/M phase transition (GO:1902750)	1969-02-01	0.811771	0.999995	0	0	0.650098	0.13557	PSMD7;FBXL7
negative regulation of response to stimulus (GO:0048585)	4/127	0.813168	0.999995	0	0	0.707773	0.14638	DDR1;ERBB2;ZKSCAN3;HLA-G
vascular endothelial growth factor receptor signaling pathway (GO:0048010)	1970-02-01	0.818062	0.999995	0	0	0.640504	0.128624	PIK3R1;ACTG1
protein ubiquitination involved in ubiquitin-dependent protein catabolic process (GO:0042787)	1970-02-01	0.818062	0.999995	0	0	0.640504	0.128624	MYLIP;RNF144B
snRNA transcription (GO:0009301)	1970-02-01	0.818062	0.999995	0	0	0.640504	0.128624	CDK7;RPRD1A
snRNA transcription from RNA polymerase II promoter (GO:0042795)	1970-02-01	0.818062	0.999995	0	0	0.640504	0.128624	CDK7;RPRD1A
T cell differentiation (GO:0030217)	1938-01-01	0.818327	0.999995	0	0	0.588856	0.118062	SOX4
positive regulation of neuron death (GO:1901216)	1938-01-01	0.818327	0.999995	0	0	0.588856	0.118062	TP53
DNA damage checkpoint (GO:0000077)	1938-01-01	0.818327	0.999995	0	0	0.588856	0.118062	RAD17
homotypic cell-cell adhesion (GO:0034109)	1938-01-01	0.818327	0.999995	0	0	0.588856	0.118062	ACTG1
positive regulation of DNA repair (GO:0045739)	1938-01-01	0.818327	0.999995	0	0	0.588856	0.118062	RPS3
regulation of mitotic cell cycle phase transition (GO:1901990)	6/184	0.82231	0.999995	0	0	0.733175	0.143437	CCNB1;PSMD7;TUBB;CEP72;TUBB4B;TMEM14B
actomyosin structure organization (GO:0031032)	1971-02-01	0.824165	0.999995	0	0	0.631188	0.122062	MYLIP;PHACTR1
negative regulation of ubiquitin-protein ligase activity involved in mitotic cell cycle (GO:0051436)	1971-02-01	0.824165	0.999995	0	0	0.631188	0.122062	CCNB1;PSMD7
positive regulation of growth (GO:0045927)	1971-02-01	0.824165	0.999995	0	0	0.631188	0.122062	ERBB2;CIB1
signal transduction by p53 class mediator (GO:0072331)	1939-01-01	0.826308	0.999995	0	0	0.57333	0.109384	TP53
negative regulation of protein catabolic process (GO:0042177)	1939-01-01	0.826308	0.999995	0	0	0.57333	0.109384	TRIM40
regulation of extrinsic apoptotic signaling pathway via death domain receptors (GO:1902041)	1939-01-01	0.826308	0.999995	0	0	0.57333	0.109384	RIPK1
positive regulation of phagocytosis (GO:0050766)	1939-01-01	0.826308	0.999995	0	0	0.57333	0.109384	TNF
inositol lipid-mediated signaling (GO:0048017)	1939-01-01	0.826308	0.999995	0	0	0.57333	0.109384	PIK3R1
regulation of plasma membrane bounded cell projection assembly (GO:0120032)	1939-01-01	0.826308	0.999995	0	0	0.57333	0.109384	CYLD
mitotic DNA damage checkpoint (GO:0044773)	1939-01-01	0.826308	0.999995	0	0	0.57333	0.109384	TP53
alpha-amino acid catabolic process (GO:1901606)	1939-01-01	0.826308	0.999995	0	0	0.57333	0.109384	MTRR
acyl-CoA metabolic process (GO:0006637)	1939-01-01	0.826308	0.999995	0	0	0.57333	0.109384	ACOT13
DNA biosynthetic process (GO:0071897)	1939-01-01	0.826308	0.999995	0	0	0.57333	0.109384	WRNIP1
response to metal ion (GO:0010038)	1972-02-01	0.830083	0.999995	0	0	0.622139	0.115861	HFE;SLC30A5
regulation of fat cell differentiation (GO:0045598)	1972-02-01	0.830083	0.999995	0	0	0.622139	0.115861	TRIO;TNF
regulation of ubiquitin-protein ligase activity involved in mitotic cell cycle (GO:0051439)	1972-02-01	0.830083	0.999995	0	0	0.622139	0.115861	CCNB1;PSMD7
regulation of epithelial cell proliferation (GO:0050678)	1972-02-01	0.830083	0.999995	0	0	0.622139	0.115861	ERBB2;BMP6
negative regulation of cell cycle (GO:0045786)	1972-02-01	0.830083	0.999995	0	0	0.622139	0.115861	FOXC1;GMNN
positive regulation of cellular biosynthetic process (GO:0031328)	5/159	0.831646	0.999995	0	0	0.706281	0.130202	EDN1;DYRK2;ERBB2;TNF;SOX4
negative regulation of epidermal growth factor receptor signaling pathway (GO:0042059)	1940-01-01	0.833939	0.999995	0	0	0.5586	0.101439	ITGA1
regulation of protein dephosphorylation (GO:0035304)	1940-01-01	0.833939	0.999995	0	0	0.5586	0.101439	PPP1R11
cognition (GO:0050890)	1940-01-01	0.833939	0.999995	0	0	0.5586	0.101439	NIPBL
sensory organ development (GO:0007423)	1940-01-01	0.833939	0.999995	0	0	0.5586	0.101439	FOXC1
response to cAMP (GO:0051591)	1940-01-01	0.833939	0.999995	0	0	0.5586	0.101439	NDUFS4
sterol biosynthetic process (GO:0016126)	1940-01-01	0.833939	0.999995	0	0	0.5586	0.101439	DHCR24
androgen receptor signaling pathway (GO:0030521)	1940-01-01	0.833939	0.999995	0	0	0.5586	0.101439	CDK7
negative regulation of ERK1 and ERK2 cascade (GO:0070373)	1940-01-01	0.833939	0.999995	0	0	0.5586	0.101439	GSTP1
regulation of release of cytochrome c from mitochondria (GO:0090199)	1940-01-01	0.833939	0.999995	0	0	0.5586	0.101439	TP53
negative regulation of cytokine-mediated signaling pathway (GO:0001960)	1940-01-01	0.833939	0.999995	0	0	0.5586	0.101439	GSTP1
positive regulation of cytokine biosynthetic process (GO:0042108)	1940-01-01	0.833939	0.999995	0	0	0.5586	0.101439	TNF
positive regulation of inflammatory response (GO:0050729)	1973-02-01	0.835821	0.999995	0	0	0.613344	0.109998	PTGER4;OSMR
regulation of peptide hormone secretion (GO:0090276)	1973-02-01	0.835821	0.999995	0	0	0.613344	0.109998	HFE;TNF
regulation of protein complex assembly (GO:0043254)	1973-02-01	0.835821	0.999995	0	0	0.613344	0.109998	RPS3;TNF
positive regulation of cytokine secretion (GO:0050715)	1973-02-01	0.835821	0.999995	0	0	0.613344	0.109998	PTGER4;TNF
nucleic acid phosphodiester bond hydrolysis (GO:0090305)	1973-02-01	0.835821	0.999995	0	0	0.613344	0.109998	PAPD7;GTF2H4
negative regulation of intracellular signal transduction (GO:1902532)	5/161	0.839539	0.999995	0	0	0.697152	0.121934	TRIM40;TSPAN6;GSTP1;CIB1;RIPK1
cellular response to organic substance (GO:0071310)	4/133	0.840178	0.999995	0	0	0.674641	0.117483	GHR;ERBB2;CIB1;TNF
odontogenesis (GO:0042476)	1941-01-01	0.841236	0.999995	0	0	0.544606	0.0941533	FOXC1
regulation of phagocytosis (GO:0050764)	1941-01-01	0.841236	0.999995	0	0	0.544606	0.0941533	TNF
DNA duplex unwinding (GO:0032508)	1941-01-01	0.841236	0.999995	0	0	0.544606	0.0941533	GTF2H4
calcium-dependent cell-cell adhesion via plasma membrane cell adhesion molecules (GO:0016339)	1941-01-01	0.841236	0.999995	0	0	0.544606	0.0941533	CDH6
positive regulation of cell division (GO:0051781)	1941-01-01	0.841236	0.999995	0	0	0.544606	0.0941533	RXFP3
cellular response to peptide (GO:1901653)	1941-01-01	0.841236	0.999995	0	0	0.544606	0.0941533	TP53
positive regulation of viral transcription (GO:0050434)	1941-01-01	0.841236	0.999995	0	0	0.544606	0.0941533	SUPT4H1
regulation of cellular metabolic process (GO:0031323)	1941-01-01	0.841236	0.999995	0	0	0.544606	0.0941533	BTN2A2
positive regulation of epithelial cell migration (GO:0010634)	1974-02-01	0.841383	0.999995	0	0	0.604794	0.104453	EDN1;RREB1
mitotic spindle organization (GO:0007052)	1974-02-01	0.841383	0.999995	0	0	0.604794	0.104453	CCNB1;KIF2A
glucose homeostasis (GO:0042593)	1974-02-01	0.841383	0.999995	0	0	0.604794	0.104453	PIK3R1;SOX4
protein homooligomerization (GO:0051260)	6/190	0.844518	0.999995	0	0	0.709043	0.11982	ALDH5A1;HM13;ACOT13;RIPK1;SOD2;TP53
purine ribonucleotide biosynthetic process (GO:0009152)	1975-02-01	0.846774	0.999995	0	0	0.596477	0.0992071	PPCS;ADCY2
cellular response to radiation (GO:0071478)	1942-01-01	0.848212	0.999995	0	0	0.531295	0.0874644	TP53
positive regulation of protein localization to nucleus (GO:1900182)	1942-01-01	0.848212	0.999995	0	0	0.531295	0.0874644	CCT5
regulation of ion transmembrane transporter activity (GO:0032412)	1942-01-01	0.848212	0.999995	0	0	0.531295	0.0874644	RIPK1
regulation of telomerase activity (GO:0051972)	1942-01-01	0.848212	0.999995	0	0	0.531295	0.0874644	TP53
translesion synthesis (GO:0019985)	1942-01-01	0.848212	0.999995	0	0	0.531295	0.0874644	PAPD7
RNA splicing (GO:0008380)	3/106	0.84921	0.999995	0	0	0.633845	0.103602	PRPF4B;SNRNP48;HNRNPH3
positive regulation of ubiquitin-protein ligase activity involved in regulation of mitotic cell cycle transition (GO:0051437)	1976-02-01	0.851998	0.999995	0	0	0.588386	0.0942428	CCNB1;PSMD7
viral process (GO:0016032)	7/220	0.853292	0.999995	0	0	0.714317	0.113328	RPL18A;PCBP2;RPLP0;RPS3;AP2B1;RPL18;TP53
positive regulation of epithelial cell proliferation (GO:0050679)	3/107	0.853636	0.999995	0	0	0.627717	0.0993362	ERBB2;RREB1;BMP6
regulation of protein secretion (GO:0050708)	3/107	0.853636	0.999995	0	0	0.627717	0.0993362	UNC13B;TNF;BMP6
regulation of B cell proliferation (GO:0030888)	1943-01-01	0.854882	0.999995	0	0	0.518618	0.0813153	CD320
mitotic metaphase plate congression (GO:0007080)	1943-01-01	0.854882	0.999995	0	0	0.518618	0.0813153	CCNB1
RNA catabolic process (GO:0006401)	1943-01-01	0.854882	0.999995	0	0	0.518618	0.0813153	SKIV2L2
response to unfolded protein (GO:0006986)	1943-01-01	0.854882	0.999995	0	0	0.518618	0.0813153	HSPB3
response to hydrogen peroxide (GO:0042542)	1943-01-01	0.854882	0.999995	0	0	0.518618	0.0813153	RPS3
positive regulation of interleukin-6 production (GO:0032755)	1943-01-01	0.854882	0.999995	0	0	0.518618	0.0813153	ISL1
substantia nigra development (GO:0021762)	1943-01-01	0.854882	0.999995	0	0	0.518618	0.0813153	BASP1
nucleobase-containing compound catabolic process (GO:0034655)	1943-01-01	0.854882	0.999995	0	0	0.518618	0.0813153	SKIV2L2
positive regulation of cell migration (GO:0030335)	7/221	0.856408	0.999995	0	0	0.710941	0.110202	NIPBL;EDN1;CD151;GCNT2;CIB1;SOD2;RREB1
water-soluble vitamin metabolic process (GO:0006767)	1977-02-01	0.857058	0.999995	0	0	0.58051	0.0895433	MTRR;CD320
negative regulation of ubiquitin protein ligase activity (GO:1904667)	1977-02-01	0.857058	0.999995	0	0	0.58051	0.0895433	CCNB1;PSMD7
cellular response to tumor necrosis factor (GO:0071356)	6/194	0.858033	0.999995	0	0	0.69381	0.106231	PSMD7;RPS3;LTA;CIB1;RIPK1;TNF
ribosomal small subunit biogenesis (GO:0042274)	1944-01-01	0.861259	0.999995	0	0	0.506531	0.0756556	RIOK1
regulation of focal adhesion assembly (GO:0051893)	1944-01-01	0.861259	0.999995	0	0	0.506531	0.0756556	S100A10
adherens junction organization (GO:0034332)	1944-01-01	0.861259	0.999995	0	0	0.506531	0.0756556	CDH6
positive regulation of viral life cycle (GO:1903902)	1944-01-01	0.861259	0.999995	0	0	0.506531	0.0756556	TRIM38
unsaturated fatty acid metabolic process (GO:0033559)	1944-01-01	0.861259	0.999995	0	0	0.506531	0.0756556	GSTP1
regulation of T cell activation (GO:0050863)	1944-01-01	0.861259	0.999995	0	0	0.506531	0.0756556	HLA-DPA1
mitotic nuclear envelope disassembly (GO:0007077)	1944-01-01	0.861259	0.999995	0	0	0.506531	0.0756556	CCNB1
metaphase plate congression (GO:0051310)	1944-01-01	0.861259	0.999995	0	0	0.506531	0.0756556	CCNB1
posttranscriptional regulation of gene expression (GO:0010608)	1944-01-01	0.861259	0.999995	0	0	0.506531	0.0756556	GCNT2
negative regulation of immune response (GO:0050777)	1944-01-01	0.861259	0.999995	0	0	0.506531	0.0756556	HLA-G
positive regulation of actin filament bundle assembly (GO:0032233)	1944-01-01	0.861259	0.999995	0	0	0.506531	0.0756556	S100A10
positive regulation of viral process (GO:0048524)	1944-01-01	0.861259	0.999995	0	0	0.506531	0.0756556	SUPT4H1
adenylate cyclase-activating G-protein coupled receptor signaling pathway (GO:0007189)	1978-02-01	0.861961	0.999995	0	0	0.572842	0.0850932	PTGER4;ADCY2
positive regulation of translation (GO:0045727)	1978-02-01	0.861961	0.999995	0	0	0.572842	0.0850932	ERBB2;SOX4
negative regulation of cell communication (GO:0010648)	1978-02-01	0.861961	0.999995	0	0	0.572842	0.0850932	DDR1;ERBB2
regulation of cell motility (GO:2000145)	3/109	0.862151	0.999995	0	0	0.615809	0.09134	KIF2A;ERBB2;SPINT2
positive regulation of cysteine-type endopeptidase activity involved in apoptotic process (GO:0043280)	3/109	0.862151	0.999995	0	0	0.615809	0.09134	RPS3;RIPK1;TNF
cellular response to growth factor stimulus (GO:0071363)	4/139	0.863833	0.999995	0	0	0.644453	0.0943326	FOXC1;ERBB2;CIB1;BMP6
peptidyl-tyrosine phosphorylation (GO:0018108)	1979-02-01	0.866708	0.999995	0	0	0.565373	0.0808781	DDR1;GHR
activation of cysteine-type endopeptidase activity involved in apoptotic process (GO:0006919)	1979-02-01	0.866708	0.999995	0	0	0.565373	0.0808781	RIPK1;TNF
hexose metabolic process (GO:0019318)	1945-01-01	0.867356	0.999995	0	0	0.494993	0.0704404	ALDH5A1
protein polymerization (GO:0051258)	1945-01-01	0.867356	0.999995	0	0	0.494993	0.0704404	AIF1
positive regulation of blood vessel endothelial cell migration (GO:0043536)	1945-01-01	0.867356	0.999995	0	0	0.494993	0.0704404	CIB1
nicotinamide nucleotide metabolic process (GO:0046496)	1945-01-01	0.867356	0.999995	0	0	0.494993	0.0704404	NT5E
peptidyl-tyrosine autophosphorylation (GO:0038083)	1945-01-01	0.867356	0.999995	0	0	0.494993	0.0704404	DDR1
negative regulation of sequence-specific DNA binding transcription factor activity (GO:0043433)	4/140	0.867469	0.999995	0	0	0.639681	0.0909467	CYLD;TRIM40;PRMT2;NFKBIL1
spindle assembly (GO:0051225)	1980-02-01	0.871306	0.999995	0	0	0.558095	0.0768844	KIF2A;RPS3
ERBB signaling pathway (GO:0038127)	1980-02-01	0.871306	0.999995	0	0	0.558095	0.0768844	ERBB2;PIK3R1
nucleic acid metabolic process (GO:0090304)	1980-02-01	0.871306	0.999995	0	0	0.558095	0.0768844	NT5E;PCBP2
regulation of protein serine/threonine kinase activity (GO:0071900)	1980-02-01	0.871306	0.999995	0	0	0.558095	0.0768844	CDK7;CIB1
negative regulation of MAPK cascade (GO:0043409)	1980-02-01	0.871306	0.999995	0	0	0.558095	0.0768844	QARS;GSTP1
nuclear envelope disassembly (GO:0051081)	1946-01-01	0.873185	0.999995	0	0	0.483968	0.0656296	CCNB1
cartilage development (GO:0051216)	1946-01-01	0.873185	0.999995	0	0	0.483968	0.0656296	COL11A2
RNA secondary structure unwinding (GO:0010501)	1946-01-01	0.873185	0.999995	0	0	0.483968	0.0656296	DDX4
maturation of SSU-rRNA (GO:0030490)	1946-01-01	0.873185	0.999995	0	0	0.483968	0.0656296	RIOK1
mitotic spindle assembly (GO:0090307)	1946-01-01	0.873185	0.999995	0	0	0.483968	0.0656296	KIF2A
aminoglycan biosynthetic process (GO:0006023)	1946-01-01	0.873185	0.999995	0	0	0.483968	0.0656296	GCNT2
negative regulation of autophagy (GO:0010507)	1946-01-01	0.873185	0.999995	0	0	0.483968	0.0656296	ZKSCAN3
positive regulation of macromolecule biosynthetic process (GO:0010557)	4/142	0.874493	0.999995	0	0	0.630343	0.0845361	EDN1;DYRK2;ERBB2;SOX4
BMP signaling pathway (GO:0030509)	1981-02-01	0.875757	0.999995	0	0	0.551002	0.0730995	HFE;BMP6
protein polyubiquitination (GO:0000209)	9/283	0.877347	0.999995	0	0	0.713281	0.0933344	RNF144B;MYLIP;PSMD7;RNF180;FBXO4;UBE2V2;SKP2;MARCH6;FBXL7
positive regulation of kinase activity (GO:0033674)	3/113	0.877882	0.999995	0	0	0.593291	0.0772718	DDR1;ERBB2;TNF
peptide cross-linking (GO:0018149)	1947-01-01	0.878759	0.999995	0	0	0.473422	0.0611873	DSP
regulation of organelle assembly (GO:1902115)	1947-01-01	0.878759	0.999995	0	0	0.473422	0.0611873	CYLD
histone H4 acetylation (GO:0043967)	1947-01-01	0.878759	0.999995	0	0	0.473422	0.0611873	MORF4L2
regulation of anatomical structure morphogenesis (GO:0022603)	1982-02-01	0.880066	0.999995	0	0	0.544086	0.0695116	PHLDB1;ERBB2
positive regulation of ubiquitin protein ligase activity (GO:1904668)	1982-02-01	0.880066	0.999995	0	0	0.544086	0.0695116	CCNB1;PSMD7
positive regulation of transmembrane receptor protein serine/threonine kinase signaling pathway (GO:0090100)	1982-02-01	0.880066	0.999995	0	0	0.544086	0.0695116	HFE;BMP6
ephrin receptor signaling pathway (GO:0048013)	1982-02-01	0.880066	0.999995	0	0	0.544086	0.0695116	AP2B1;ACTG1
negative regulation of binding (GO:0051100)	1982-02-01	0.880066	0.999995	0	0	0.544086	0.0695116	GZMA;ID4
positive regulation of multicellular organismal process (GO:0051240)	6/202	0.882162	0.999995	0	0	0.66521	0.0834034	GHR;FOXC1;GCNT2;HLA-G;RREB1;TNF
nuclear-transcribed mRNA catabolic process (GO:0000956)	5/174	0.88371	0.999995	0	0	0.643084	0.0795022	RPL18A;RPLP0;RPS3;RPL18;PELO
negative regulation of mitotic cell cycle (GO:0045930)	1948-01-01	0.884088	0.999995	0	0	0.463325	0.0570811	FOXC1
cytoplasmic microtubule organization (GO:0031122)	1948-01-01	0.884088	0.999995	0	0	0.463325	0.0570811	CIB1
protein K48-linked ubiquitination (GO:0070936)	1948-01-01	0.884088	0.999995	0	0	0.463325	0.0570811	2021-03-06
regulation of cell cycle arrest (GO:0071156)	1948-01-01	0.884088	0.999995	0	0	0.463325	0.0570811	TP53
regulation of epithelial cell migration (GO:0010632)	1948-01-01	0.884088	0.999995	0	0	0.463325	0.0570811	RREB1
pattern recognition receptor signaling pathway (GO:0002221)	1948-01-01	0.884088	0.999995	0	0	0.463325	0.0570811	LRRC70
positive regulation of chemotaxis (GO:0050921)	1948-01-01	0.884088	0.999995	0	0	0.463325	0.0570811	AIF1
negative regulation of signaling (GO:0023057)	1983-02-01	0.884236	0.999995	0	0	0.53734	0.0661096	DDR1;ERBB2
positive regulation of protein ubiquitination (GO:0031398)	1983-02-01	0.884236	0.999995	0	0	0.53734	0.0661096	NDFIP1;FBXO4
negative regulation of neuron death (GO:1901215)	1983-02-01	0.884236	0.999995	0	0	0.53734	0.0661096	SOD2;ISL1
apoptotic process (GO:0006915)	7/231	0.884693	0.999995	0	0	0.678843	0.0831679	GZMA;LY86;LTA;CIB1;RIPK1;DHCR24;MRPS30
protein O-linked glycosylation (GO:0006493)	3/115	0.885134	0.999995	0	0	0.582635	0.0710909	GALNT4;POC1B-GALNT4;MUC21
positive regulation of supramolecular fiber organization (GO:1902905)	1984-02-01	0.888272	0.999995	0	0	0.53076	0.062883	EDN1;RPS3
positive regulation of peptidyl-tyrosine phosphorylation (GO:0050731)	3/116	0.888614	0.999995	0	0	0.577449	0.0681923	GHR;IL31RA;TP53
RNA methylation (GO:0001510)	1949-01-01	0.889183	0.999995	0	0	0.453648	0.0532822	FBL
cilium movement (GO:0003341)	1949-01-01	0.889183	0.999995	0	0	0.453648	0.0532822	ROPN1L
positive regulation of response to DNA damage stimulus (GO:2001022)	1949-01-01	0.889183	0.999995	0	0	0.453648	0.0532822	RPS3
gonad development (GO:0008406)	1949-01-01	0.889183	0.999995	0	0	0.453648	0.0532822	BASP1
protein localization to cell periphery (GO:1990778)	3/117	0.891999	0.999995	0	0	0.572353	0.0654143	TNF;S100A10;NKD2
activation of MAPK activity (GO:0000187)	3/117	0.891999	0.999995	0	0	0.572353	0.0654143	GHR;RIPK1;TNF
regulation of peptidyl-tyrosine phosphorylation (GO:0050730)	1985-02-01	0.892177	0.999995	0	0	0.524337	0.0598221	GHR;TP53
positive regulation of MAP kinase activity (GO:0043406)	5/177	0.892285	0.999995	0	0	0.631767	0.072002	GHR;EDN1;ERBB2;RPS3;TNF
regulation of ion transport (GO:0043269)	1950-01-01	0.894054	0.999995	0	0	0.444367	0.0497643	SLC30A5
regulation of bone mineralization (GO:0030500)	1950-01-01	0.894054	0.999995	0	0	0.444367	0.0497643	BMP6
regulation of cellular protein metabolic process (GO:0032268)	1950-01-01	0.894054	0.999995	0	0	0.444367	0.0497643	EDN1
myeloid leukocyte differentiation (GO:0002573)	1950-01-01	0.894054	0.999995	0	0	0.444367	0.0497643	IL31RA
wound healing (GO:0042060)	1950-01-01	0.894054	0.999995	0	0	0.444367	0.0497643	ERBB2
negative regulation of viral genome replication (GO:0045071)	1950-01-01	0.894054	0.999995	0	0	0.444367	0.0497643	TNF
cytokine-mediated signaling pathway (GO:0019221)	22/633	0.894732	0.999995	0	0	0.779594	0.0867153	FOXC1;HFE;RPLP0;IL31RA;HLA-A;PIK3R1;HLA-F;OSMR;SOD2;TNF;HLA-G;HLA-E;PSMD7;HIST1H3A;LTA;TRIM26;RIPK1;TRIM38;TRIM31;IL7R;TP53;HLA-DPA1
heart development (GO:0007507)	4/149	0.896597	0.999995	0	0	0.599692	0.0654554	NIPBL;FOXC1;ISL1;SOX4
RNA splicing, via transesterification reactions with bulged adenosine as nucleophile (GO:0000377)	7/236	0.896993	0.999995	0	0	0.663846	0.072165	PABPN1;PCBP2;PPWD1;PRPF4B;SNRNP48;HNRNPH3;CWC27
positive regulation of cell motility (GO:2000147)	5/179	0.897695	0.999995	0	0	0.62444	0.0673927	EDN1;CD151;GCNT2;CIB1;SOD2
regulation of phosphorylation (GO:0042325)	3/119	0.898494	0.999995	0	0	0.562426	0.0601994	NDUFS4;RAD17;ROPN1L
brain development (GO:0007420)	3/119	0.898494	0.999995	0	0	0.562426	0.0601994	NIPBL;QARS;NDUFS4
regulation of exocytosis (GO:0017157)	1951-01-01	0.898711	0.999995	0	0	0.435457	0.046504	RAB3C
response to organonitrogen compound (GO:0010243)	1951-01-01	0.898711	0.999995	0	0	0.435457	0.046504	2021-03-06
regulation of cellular amine metabolic process (GO:0033238)	1951-01-01	0.898711	0.999995	0	0	0.435457	0.046504	PSMD7
telomere maintenance (GO:0000723)	1951-01-01	0.898711	0.999995	0	0	0.435457	0.046504	HIST1H4A
regulation of cellular amino acid metabolic process (GO:0006521)	1951-01-01	0.898711	0.999995	0	0	0.435457	0.046504	PSMD7
positive regulation of developmental growth (GO:0048639)	1951-01-01	0.898711	0.999995	0	0	0.435457	0.046504	GHR
cellular response to BMP stimulus (GO:0071773)	1987-02-01	0.899609	0.999995	0	0	0.511946	0.0541613	HFE;BMP6
positive regulation of protein ubiquitination involved in ubiquitin-dependent protein catabolic process (GO:2000060)	1987-02-01	0.899609	0.999995	0	0	0.511946	0.0541613	CCNB1;PSMD7
macromolecular complex assembly (GO:0065003)	3/120	0.901608	0.999995	0	0	0.55759	0.0577527	OCLN;HFE;TP53
Wnt signaling pathway, planar cell polarity pathway (GO:0060071)	1988-02-01	0.903143	0.999995	0	0	0.505967	0.0515448	PSMD7;AP2B1
positive regulation of ossification (GO:0045778)	1952-01-01	0.903164	0.999995	0	0	0.426896	0.0434799	BMP6
regulation of cell-matrix adhesion (GO:0001952)	1952-01-01	0.903164	0.999995	0	0	0.426896	0.0434799	CIB1
positive regulation of nervous system development (GO:0051962)	1952-01-01	0.903164	0.999995	0	0	0.426896	0.0434799	CLSTN1
regulation of acute inflammatory response (GO:0002673)	3/121	0.904635	0.999995	0	0	0.552835	0.0554071	C7;GSTP1;OSMR
positive regulation of intracellular protein transport (GO:0090316)	4/152	0.904973	0.999995	0	0	0.587443	0.0586564	DPCR1;ERBB2;CIB1;TP53
protein stabilization (GO:0050821)	4/152	0.904973	0.999995	0	0	0.587443	0.0586564	CDK7;PIK3R1;SOX4;CCT5
regulation of programmed cell death (GO:0043067)	8/268	0.905674	0.999995	0	0	0.667894	0.0661722	MAP3K1;RPS3;TMEM219;RIPK1;SKP2;TP53;TNF;BMP6
negative regulation of cellular protein metabolic process (GO:0032269)	1989-02-01	0.906561	0.999995	0	0	0.500125	0.0490605	EDN1;RPS3
regulation of establishment of planar polarity (GO:0090175)	1989-02-01	0.906561	0.999995	0	0	0.500125	0.0490605	PSMD7;AP2B1
peptidyl-threonine modification (GO:0018210)	1989-02-01	0.906561	0.999995	0	0	0.500125	0.0490605	GALNT4;POC1B-GALNT4
embryonic organ development (GO:0048568)	1953-01-01	0.907421	0.999995	0	0	0.418664	0.0406726	TNF
negative regulation of cellular component organization (GO:0051129)	1954-01-01	0.911491	0.999995	0	0	0.410744	0.0380648	TNF
negative regulation of supramolecular fiber organization (GO:1902904)	1954-01-01	0.911491	0.999995	0	0	0.410744	0.0380648	CIB1
positive regulation of cellular protein metabolic process (GO:0032270)	1991-02-01	0.913061	0.999995	0	0	0.488835	0.0444606	ERBB2;SOX4
regulation of protein catabolic process (GO:0042176)	1991-02-01	0.913061	0.999995	0	0	0.488835	0.0444606	TRIM40;TNF
negative regulation of kinase activity (GO:0033673)	1991-02-01	0.913061	0.999995	0	0	0.488835	0.0444606	QARS;GSTP1
positive regulation of cysteine-type endopeptidase activity (GO:2001056)	1955-01-01	0.915383	0.999995	0	0	0.403116	0.0356406	TNF
long-chain fatty acid metabolic process (GO:0001676)	1955-01-01	0.915383	0.999995	0	0	0.403116	0.0356406	GSTP1
regulation of axonogenesis (GO:0050770)	1955-01-01	0.915383	0.999995	0	0	0.403116	0.0356406	ZSWIM6
regulation of RNA splicing (GO:0043484)	1955-01-01	0.915383	0.999995	0	0	0.403116	0.0356406	PIK3R1
G-protein coupled receptor signaling pathway, coupled to cyclic nucleotide second messenger (GO:0007187)	3/125	0.915919	0.999995	0	0	0.534597	0.046952	PTGER4;ADCY2;RXFP3
regulation of secretion by cell (GO:1903530)	1956-01-01	0.919104	0.999995	0	0	0.395766	0.0333854	RAB3C
ribosome assembly (GO:0042255)	1956-01-01	0.919104	0.999995	0	0	0.395766	0.0333854	BRIX1
anion transport (GO:0006820)	1956-01-01	0.919104	0.999995	0	0	0.395766	0.0333854	SLC17A4
chordate embryonic development (GO:0043009)	1956-01-01	0.919104	0.999995	0	0	0.395766	0.0333854	ISL1
cellular defense response (GO:0006968)	1956-01-01	0.919104	0.999995	0	0	0.395766	0.0333854	HLA-G
organonitrogen compound catabolic process (GO:1901565)	1956-01-01	0.919104	0.999995	0	0	0.395766	0.0333854	PRSS16
protein import (GO:0017038)	1956-01-01	0.919104	0.999995	0	0	0.395766	0.0333854	IPO11
negative regulation of cellular catabolic process (GO:0031330)	1956-01-01	0.919104	0.999995	0	0	0.395766	0.0333854	ZKSCAN3
regulation of cysteine-type endopeptidase activity involved in apoptotic process (GO:0043281)	1993-02-01	0.919135	0.999995	0	0	0.478041	0.0403093	DHCR24;TNF
positive regulation of protein kinase B signaling (GO:0051897)	3/127	0.921093	0.999995	0	0	0.525919	0.0432274	ERBB2;GCNT2;PIK3R1
chloride transmembrane transport (GO:1902476)	1957-01-01	0.922661	0.999995	0	0	0.388678	0.0312861	SLC1A3
epidermal growth factor receptor signaling pathway (GO:0007173)	1957-01-01	0.922661	0.999995	0	0	0.388678	0.0312861	PIK3R1
response to retinoic acid (GO:0032526)	1957-01-01	0.922661	0.999995	0	0	0.388678	0.0312861	MICB
RNA metabolic process (GO:0016070)	5/191	0.925448	0.999995	0	0	0.583783	0.0452298	DDX4;PABPN1;PCBP2;HNRNPH3;SKIV2L2
mitotic cell cycle phase transition (GO:0044772)	6/221	0.925939	0.999995	0	0	0.605815	0.0466154	CCNB1;CDK7;TUBB;CEP72;TUBB4B;FBXL7
receptor metabolic process (GO:0043112)	1958-01-01	0.926062	0.999995	0	0	0.381839	0.0293308	TNF
ubiquitin-dependent ERAD pathway (GO:0030433)	1958-01-01	0.926062	0.999995	0	0	0.381839	0.0293308	2021-03-06
tRNA modification (GO:0006400)	1958-01-01	0.926062	0.999995	0	0	0.381839	0.0293308	CDKAL1
regulation of epidermal growth factor receptor signaling pathway (GO:0042058)	1958-01-01	0.926062	0.999995	0	0	0.381839	0.0293308	ITGA1
integrin-mediated signaling pathway (GO:0007229)	1958-01-01	0.926062	0.999995	0	0	0.381839	0.0293308	ITGA2
sodium ion transport (GO:0006814)	1958-01-01	0.926062	0.999995	0	0	0.381839	0.0293308	SLC17A4
epithelial cell differentiation (GO:0030855)	1996-02-01	0.927502	0.999995	0	0	0.462711	0.0348237	BASP1;HNRNPH3
regulation of cell death (GO:0010941)	1996-02-01	0.927502	0.999995	0	0	0.462711	0.0348237	DHCR24;SOX4
protein localization to plasma membrane (GO:0072659)	3/130	0.92831	0.999995	0	0	0.513415	0.0381928	TNF;S100A10;NKD2
mitotic cytokinesis (GO:0000281)	1959-01-01	0.929313	0.999995	0	0	0.375236	0.0275083	SNX18
keratinocyte differentiation (GO:0030216)	1959-01-01	0.929313	0.999995	0	0	0.375236	0.0275083	DSP
RNA processing (GO:0006396)	5/193	0.929361	0.999995	0	0	0.577512	0.0423073	PABPN1;SUPT4H1;PRPF4B;SNRNP48;HNRNPH3
regulation of protein kinase B signaling (GO:0051896)	4/163	0.930762	0.999995	0	0	0.546485	0.0392112	ERBB2;GCNT2;CIB1;PIK3R1
positive regulation of protein modification process (GO:0031401)	4/163	0.930762	0.999995	0	0	0.546485	0.0392112	ERBB2;CIB1;RIPK1;TNF
cellular macromolecule biosynthetic process (GO:0034645)	11/367	0.931929	0.999995	0	0	0.669606	0.0472067	RPL18A;MRPS36;RPLP0;MRPS18B;RPS3;RAD17;TARS;RPL18;PELO;ILF2;ABCF1
regulation of mRNA splicing, via spliceosome (GO:0048024)	1960-01-01	0.932422	0.999995	0	0	0.368857	0.0258089	PRDX6
positive regulation of protein binding (GO:0032092)	1960-01-01	0.932422	0.999995	0	0	0.368857	0.0258089	HFE
histone modification (GO:0016570)	1998-02-01	0.932619	0.999995	0	0	0.453024	0.0316025	PRMT2;MORF4L2
response to UV (GO:0009411)	1998-02-01	0.932619	0.999995	0	0	0.453024	0.0316025	PAPD7;TP53
regulation of mitotic cell cycle (GO:0007346)	4/165	0.934708	0.999995	0	0	0.53964	0.0364374	CYLD;CCNB1;FOXC1;MAP3K1
steroid metabolic process (GO:0008202)	1999-02-01	0.935047	0.999995	0	0	0.44833	0.0301093	SRD5A1;DHCR24
small GTPase mediated signal transduction (GO:0007264)	1999-02-01	0.935047	0.999995	0	0	0.44833	0.0301093	TP53;RREB1
actin cytoskeleton reorganization (GO:0031532)	1961-01-01	0.935394	0.999995	0	0	0.36269	0.0242231	PHACTR1
positive regulation of leukocyte chemotaxis (GO:0002690)	1961-01-01	0.935394	0.999995	0	0	0.36269	0.0242231	AIF1
glycosaminoglycan metabolic process (GO:0030203)	1961-01-01	0.935394	0.999995	0	0	0.36269	0.0242231	GCNT2
RNA 3'-end processing (GO:0031123)	1961-01-01	0.935394	0.999995	0	0	0.36269	0.0242231	PABPN1
negative regulation of MAP kinase activity (GO:0043407)	1961-01-01	0.935394	0.999995	0	0	0.36269	0.0242231	GSTP1
protein modification by small protein conjugation (GO:0032446)	12/398	0.936341	0.999995	0	0	0.673407	0.0442939	HIST1H2BN;MYLIP;HIST1H2BM;TRIM40;HIST1H2BO;RNF182;FBXO4;UBE2V2;HIST1H2BH;HIST1H2BA;FBXL7;HIST1H2BD
adenylate cyclase-modulating G-protein coupled receptor signaling pathway (GO:0007188)	3/134	0.93699	0.999995	0	0	0.497633	0.0323874	PTGER4;ADCY2;RXFP3
cellular response to metal ion (GO:0071248)	2/100	0.937392	0.999995	0	0	0.443732	0.028689	HFE;BMP6
positive regulation of type I interferon production (GO:0032481)	1962-01-01	0.938236	0.999995	0	0	0.356726	0.0227428	TRIM15
positive regulation of catabolic process (GO:0009896)	1962-01-01	0.938236	0.999995	0	0	0.356726	0.0227428	TNF
negative regulation of intrinsic apoptotic signaling pathway (GO:2001243)	1962-01-01	0.938236	0.999995	0	0	0.356726	0.0227428	SOD2
stress-activated MAPK cascade (GO:0051403)	1962-01-01	0.938236	0.999995	0	0	0.356726	0.0227428	PTGER4
establishment of protein localization to organelle (GO:0072594)	1962-01-01	0.938236	0.999995	0	0	0.356726	0.0227428	IPO11
second-messenger-mediated signaling (GO:0019932)	1962-01-01	0.938236	0.999995	0	0	0.356726	0.0227428	EDN1
cellular divalent inorganic cation homeostasis (GO:0072503)	2/101	0.939656	0.999995	0	0	0.439227	0.0273379	SLC30A5;ATP2A3
regulation of kinase activity (GO:0043549)	2/101	0.939656	0.999995	0	0	0.439227	0.0273379	DDR1;ERBB2
cellular protein metabolic process (GO:0044267)	15/484	0.940874	0.999995	0	0	0.692123	0.0421819	MRPS36;HM13;RPLP0;MRPS18B;TARS;PCMT1;HIST1H4A;HIST1H3A;RPL18A;RPS3;IGFBP7;RIPK1;RPL18;PELO;ABCF1
carbohydrate homeostasis (GO:0033500)	1963-01-01	0.940952	0.999995	0	0	0.350954	0.02136	SOX4
adenylate cyclase-inhibiting G-protein coupled receptor signaling pathway (GO:0007193)	1963-01-01	0.940952	0.999995	0	0	0.350954	0.02136	ADCY2
regulation of viral genome replication (GO:0045069)	1963-01-01	0.940952	0.999995	0	0	0.350954	0.02136	TNF
negative regulation of dephosphorylation (GO:0035305)	1963-01-01	0.940952	0.999995	0	0	0.350954	0.02136	PPP1R11
detection of chemical stimulus involved in sensory perception (GO:0050907)	2/102	0.941843	0.999995	0	0	0.434811	0.0260524	OR1F12;OR12D2
positive regulation of transferase activity (GO:0051347)	3/137	0.942851	0.999995	0	0	0.486415	0.028624	DDR1;PABPN1;ERBB2
regulation of cytosolic calcium ion concentration (GO:0051480)	3/137	0.942851	0.999995	0	0	0.486415	0.028624	PTGER4;SCGN;EDN1
mRNA splicing, via spliceosome (GO:0000398)	7/261	0.943052	0.999995	0	0	0.597715	0.0350462	PABPN1;PCBP2;PPWD1;PRPF4B;SNRNP48;HNRNPH3;CWC27
regulation of protein phosphorylation (GO:0001932)	7/261	0.943052	0.999995	0	0	0.597715	0.0350462	NDUFS4;ERBB2;ROPN1L;CIB1;RIPK1;TNF;BMP6
positive regulation of ERK1 and ERK2 cascade (GO:0070374)	5/201	0.943243	0.999995	0	0	0.553706	0.0323539	DDR1;ERBB2;GCNT2;CIB1;TNF
positive regulation of protein polymerization (GO:0032273)	1964-01-01	0.94355	0.999995	0	0	0.345365	0.0200679	RPS3
inorganic anion transmembrane transport (GO:0098661)	1964-01-01	0.94355	0.999995	0	0	0.345365	0.0200679	SLC1A3
homophilic cell adhesion via plasma membrane adhesion molecules (GO:0007156)	1964-01-01	0.94355	0.999995	0	0	0.345365	0.0200679	CDH6
glucose metabolic process (GO:0006006)	1964-01-01	0.94355	0.999995	0	0	0.345365	0.0200679	ALDH5A1
cellular response to decreased oxygen levels (GO:0036294)	1964-01-01	0.94355	0.999995	0	0	0.345365	0.0200679	TP53
plasma membrane invagination (GO:0099024)	2/103	0.943954	0.999995	0	0	0.430484	0.0248292	SNX18;AIF1
protein import into nucleus (GO:0006606)	2/103	0.943954	0.999995	0	0	0.430484	0.0248292	IPO11;TNF
proteasome-mediated ubiquitin-dependent protein catabolic process (GO:0043161)	8/291	0.944084	0.999995	0	0	0.612865	0.0352641	CCNB1;PSMD7;PCBP2;FBXO4;SKP2;MARCH6;TP53;FBXL7
cellular response to reactive oxygen species (GO:0034614)	1965-01-01	0.946033	0.999995	0	0	0.339951	0.0188598	RPS3
negative regulation of blood vessel morphogenesis (GO:2000181)	1965-01-01	0.946033	0.999995	0	0	0.339951	0.0188598	FOXC1
regulation of cell division (GO:0051302)	1965-01-01	0.946033	0.999995	0	0	0.339951	0.0188598	CIB1
positive regulation of hydrolase activity (GO:0051345)	4/172	0.946962	0.999995	0	0	0.516964	0.0281727	SNX18;ERBB2;RPS3;S100A10
inorganic cation transmembrane transport (GO:0098662)	3/140	0.948204	0.999995	0	0	0.475689	0.0253	NNT;SLC30A5;ATP2A3
intracellular steroid hormone receptor signaling pathway (GO:0030518)	1966-01-01	0.948407	0.999995	0	0	0.334703	0.0177298	CDK7
positive regulation of cellular protein localization (GO:1903829)	1966-01-01	0.948407	0.999995	0	0	0.334703	0.0177298	TNF
fatty acid metabolic process (GO:0006631)	2/106	0.949859	0.999995	0	0	0.418	0.0215025	GHR;ALDH5A1
modification-dependent protein catabolic process (GO:0019941)	3/141	0.949881	0.999995	0	0	0.472217	0.0242805	RNF144B;PPP1R11;FBXL7
epidermal cell differentiation (GO:0009913)	1967-01-01	0.950677	0.999995	0	0	0.329615	0.0166723	DSP
negative regulation of protein serine/threonine kinase activity (GO:0071901)	1967-01-01	0.950677	0.999995	0	0	0.329615	0.0166723	GSTP1
regulation of cyclin-dependent protein serine/threonine kinase activity (GO:0000079)	1967-01-01	0.950677	0.999995	0	0	0.329615	0.0166723	CDK7
insulin receptor signaling pathway (GO:0008286)	1967-01-01	0.950677	0.999995	0	0	0.329615	0.0166723	PIK3R1
regulation of cardiac conduction (GO:1903779)	1967-01-01	0.950677	0.999995	0	0	0.329615	0.0166723	ATP2A3
gene expression (GO:0010467)	12/411	0.951089	0.999995	0	0	0.651015	0.0326471	RPL18A;PABPN1;MRPS36;RPLP0;RPS3;MRPS18B;TARS;HNRNPH3;RPL18;ILF2;PELO;ABCF1
negative regulation of cysteine-type endopeptidase activity involved in apoptotic process (GO:0043154)	1968-01-01	0.952847	0.999995	0	0	0.324678	0.0156824	DHCR24
negative regulation of phosphatase activity (GO:0010923)	1968-01-01	0.952847	0.999995	0	0	0.324678	0.0156824	PPP1R11
cholesterol metabolic process (GO:0008203)	1968-01-01	0.952847	0.999995	0	0	0.324678	0.0156824	DHCR24
positive regulation of phosphorylation (GO:0042327)	5/208	0.953317	0.999995	0	0	0.534415	0.0255492	DDR1;ERBB2;CIB1;RIPK1;TNF
monocarboxylic acid metabolic process (GO:0032787)	2/108	0.953461	0.999995	0	0	0.41007	0.0195427	GHR;ALDH5A1
transmembrane receptor protein serine/threonine kinase signaling pathway (GO:0007178)	3/144	0.954616	0.999995	0	0	0.462096	0.0214627	HFE;GCNT2;BMP6
cellular response to DNA damage stimulus (GO:0006974)	9/329	0.954632	0.999995	0	0	0.609256	0.0282871	NIPBL;DYRK2;PAPD7;RPS3;RAD17;CIB1;TP53;GTF2H4;MICA
regulation of endothelial cell migration (GO:0010594)	1969-01-01	0.954921	0.999995	0	0	0.319887	0.0147552	EDN1
positive regulation of neurogenesis (GO:0050769)	1969-01-01	0.954921	0.999995	0	0	0.319887	0.0147552	NIPBL
regulation of innate immune response (GO:0045088)	1969-01-01	0.954921	0.999995	0	0	0.319887	0.0147552	HLA-E
negative regulation of angiogenesis (GO:0016525)	1969-01-01	0.954921	0.999995	0	0	0.319887	0.0147552	FOXC1
regulation of osteoblast differentiation (GO:0045667)	1969-01-01	0.954921	0.999995	0	0	0.319887	0.0147552	BMP6
response to organic cyclic compound (GO:0014070)	1969-01-01	0.954921	0.999995	0	0	0.319887	0.0147552	TNF
negative regulation of protein kinase activity (GO:0006469)	2/109	0.955167	0.999995	0	0	0.406216	0.0186326	QARS;GSTP1
regulation of Wnt signaling pathway (GO:0030111)	2/109	0.955167	0.999995	0	0	0.406216	0.0186326	SOX4;NKD2
cellular response to lipid (GO:0071396)	4/178	0.955749	0.999995	0	0	0.49898	0.0225836	PABPN1;NFKBIL1;GSTP1;ADCY2
positive regulation of establishment of protein localization to mitochondrion (GO:1903749)	2/110	0.956814	0.999995	0	0	0.402434	0.0177659	DPCR1;TP53
cellular response to peptide hormone stimulus (GO:0071375)	2/110	0.956814	0.999995	0	0	0.402434	0.0177659	ADCY2;PIK3R1
positive regulation of endothelial cell migration (GO:0010595)	1970-01-01	0.956905	0.999995	0	0	0.315234	0.0138865	EDN1
stress-activated protein kinase signaling cascade (GO:0031098)	1970-01-01	0.956905	0.999995	0	0	0.315234	0.0138865	MAP3K1
cytoskeleton-dependent cytokinesis (GO:0061640)	1970-01-01	0.956905	0.999995	0	0	0.315234	0.0138865	SNX18
phospholipid metabolic process (GO:0006644)	1970-01-01	0.956905	0.999995	0	0	0.315234	0.0138865	ALDH5A1
Rab protein signal transduction (GO:0032482)	1970-01-01	0.956905	0.999995	0	0	0.315234	0.0138865	RAB3C
neuropeptide signaling pathway (GO:0007218)	1970-01-01	0.956905	0.999995	0	0	0.315234	0.0138865	RXFP3
calcium-mediated signaling (GO:0019722)	1970-01-01	0.956905	0.999995	0	0	0.315234	0.0138865	EDN1
histone acetylation (GO:0016573)	1971-01-01	0.958801	0.999995	0	0	0.310714	0.0130723	MORF4L2
nuclear import (GO:0051170)	1971-01-01	0.958801	0.999995	0	0	0.310714	0.0130723	IPO11
response to insulin (GO:0032868)	1971-01-01	0.958801	0.999995	0	0	0.310714	0.0130723	PIK3R1
regulation of protein kinase activity (GO:0045859)	3/147	0.958929	0.999995	0	0	0.452398	0.0189726	QARS;GSTP1;TNF
regulation of translation (GO:0006417)	5/213	0.959485	0.999995	0	0	0.521431	0.0215654	HIST1H4A;HIST1H3A;ERBB2;RPS3;SOX4
negative regulation of cell proliferation (GO:0008285)	10/363	0.959578	0.999995	0	0	0.613296	0.0253057	GSTP1;ITGA1;CIB1;IGFBP7;E2F3;SOD2;TP53;AIF1;SOX4;HIST1H2AC
negative regulation of canonical Wnt signaling pathway (GO:0090090)	3/148	0.96028	0.999995	0	0	0.449254	0.0182086	CYLD;PSMD7;NKD2
lipid biosynthetic process (GO:0008610)	1972-01-01	0.960614	0.999995	0	0	0.306322	0.0123088	SRD5A1
glycoprotein biosynthetic process (GO:0009101)	1972-01-01	0.960614	0.999995	0	0	0.306322	0.0123088	GCNT2
regulation of neuron death (GO:1901214)	1972-01-01	0.960614	0.999995	0	0	0.306322	0.0123088	DHCR24
negative regulation of cysteine-type endopeptidase activity (GO:2000117)	1972-01-01	0.960614	0.999995	0	0	0.306322	0.0123088	DHCR24
protein ubiquitination (GO:0016567)	15/506	0.961089	0.999995	0	0	0.660331	0.0262076	HIST1H2BN;MYLIP;HIST1H2BM;HIST1H2BO;RNF180;RNF144B;PSMD7;RNF182;FBXO4;UBE2V2;HIST1H2BH;SKP2;HIST1H2BA;FBXL7;HIST1H2BD
positive regulation of canonical Wnt signaling pathway (GO:0090263)	2/113	0.961414	0.999995	0	0	0.391495	0.0154054	PSMD7;SOX4
positive regulation of intracellular signal transduction (GO:1902533)	14/479	0.96172	0.999995	0	0	0.650923	0.0254065	DDR1;NDFIP1;PIK3R1;TNF;TSPAN6;C18ORF32;ERBB2;GCNT2;RPS3;TRIM15;RIPK1;TRIM38;IL7R;TP53
regulation of cell cycle (GO:0051726)	5/215	0.961737	0.999995	0	0	0.51641	0.0201475	CYLD;CCNB1;MAP3K1;GMNN;ID4
lymphocyte differentiation (GO:0030098)	1973-01-01	0.962347	0.999995	0	0	0.302052	0.0115927	SOX4
canonical Wnt signaling pathway (GO:0060070)	1973-01-01	0.962347	0.999995	0	0	0.302052	0.0115927	SOX4
chloride transport (GO:0006821)	1973-01-01	0.962347	0.999995	0	0	0.302052	0.0115927	SLC1A3
regulation of ERK1 and ERK2 cascade (GO:0070372)	6/247	0.96248	0.999995	0	0	0.539714	0.0206398	DDR1;GSTP1;ERBB2;GCNT2;CIB1;TNF
positive regulation of cell proliferation (GO:0008284)	12/424	0.962758	0.999995	0	0	0.630035	0.0239119	EDN1;NDUFS4;ERBB2;IL31RA;GCNT2;CIB1;OSMR;IL7R;TNF;AIF1;SOX4;BMP6
positive regulation of defense response (GO:0031349)	1974-01-01	0.964004	0.999995	0	0	0.297898	0.0109208	PTGER4
mRNA 3'-end processing (GO:0031124)	1974-01-01	0.964004	0.999995	0	0	0.297898	0.0109208	PABPN1
regulation of G-protein coupled receptor protein signaling pathway (GO:0008277)	1974-01-01	0.964004	0.999995	0	0	0.297898	0.0109208	EDN1
mitotic nuclear division (GO:0140014)	1974-01-01	0.964004	0.999995	0	0	0.297898	0.0109208	KIF2A
chromatin remodeling (GO:0006338)	2/116	0.965542	0.999995	0	0	0.381133	0.0133648	MORF4L2;SUPT4H1
negative regulation of phosphorylation (GO:0042326)	1975-01-01	0.965588	0.999995	0	0	0.293857	0.0102902	CIB1
negative regulation of cellular amide metabolic process (GO:0034249)	1975-01-01	0.965588	0.999995	0	0	0.293857	0.0102902	RPS3
spermatogenesis (GO:0007283)	3/153	0.966428	0.999995	0	0	0.434165	0.0148262	DDX4;CDYL;TRIP13
double-strand break repair via homologous recombination (GO:0000724)	1976-01-01	0.967103	0.999995	0	0	0.289924	0.00969806	NIPBL
transforming growth factor beta receptor signaling pathway (GO:0007179)	1976-01-01	0.967103	0.999995	0	0	0.289924	0.00969806	GCNT2
nucleic acid-templated transcription (GO:0097659)	1976-01-01	0.967103	0.999995	0	0	0.289924	0.00969806	ILF2
hemopoiesis (GO:0030097)	1976-01-01	0.967103	0.999995	0	0	0.289924	0.00969806	FST
male gamete generation (GO:0048232)	3/154	0.967544	0.999995	0	0	0.431267	0.0142292	DDX4;CDYL;TRIP13
negative regulation of transmembrane receptor protein serine/threonine kinase signaling pathway (GO:0090101)	1977-01-01	0.968551	0.999995	0	0	0.286094	0.00914193	FST
ERAD pathway (GO:0036503)	1977-01-01	0.968551	0.999995	0	0	0.286094	0.00914193	2021-03-06
response to ionizing radiation (GO:0010212)	1977-01-01	0.968551	0.999995	0	0	0.286094	0.00914193	TP53
positive regulation of cytoskeleton organization (GO:0051495)	1977-01-01	0.968551	0.999995	0	0	0.286094	0.00914193	EDN1
regulation of cytokinesis (GO:0032465)	1977-01-01	0.968551	0.999995	0	0	0.286094	0.00914193	RXFP3
response to lipopolysaccharide (GO:0032496)	3/155	0.968626	0.999995	0	0	0.428407	0.0136562	PABPN1;NFKBIL1;GSTP1
regulation of neuron projection development (GO:0010975)	2/119	0.969243	0.999995	0	0	0.371302	0.0115994	MYLIP;CIB1
regulation of transcription from RNA polymerase II promoter in response to hypoxia (GO:0061418)	1978-01-01	0.969935	0.999995	0	0	0.282364	0.00861946	PSMD7
steroid biosynthetic process (GO:0006694)	1979-01-01	0.971259	0.999995	0	0	0.278729	0.00812846	SRD5A1
protein deubiquitination (GO:0016579)	6/257	0.971463	0.999995	0	0	0.517937	0.0149956	CYLD;PSMD7;KDM1B;RIPK1;SKP2;TP53
stimulatory C-type lectin receptor signaling pathway (GO:0002223)	2/121	0.971494	0.999995	0	0	0.365023	0.0105564	PSMD7;MUC21
regulation of cell differentiation (GO:0045595)	2/121	0.971494	0.999995	0	0	0.365023	0.0105564	PHLDB1;ISL1
retrograde vesicle-mediated transport, Golgi to ER (GO:0006890)	1980-01-01	0.972524	0.999995	0	0	0.275186	0.00766691	KIF2A
NIK/NF-kappaB signaling (GO:0038061)	1980-01-01	0.972524	0.999995	0	0	0.275186	0.00766691	PSMD7
positive regulation of stress-activated MAPK cascade (GO:0032874)	1980-01-01	0.972524	0.999995	0	0	0.275186	0.00766691	RIPK1
cellular response to hormone stimulus (GO:0032870)	1980-01-01	0.972524	0.999995	0	0	0.275186	0.00766691	GHR
positive regulation of cell differentiation (GO:0045597)	4/194	0.973036	0.999995	0	0	0.456574	0.0124803	FOXC1;GCNT2;ISL1;BMP6
protein localization to membrane (GO:0072657)	3/160	0.973542	0.999995	0	0	0.414654	0.0111188	TNF;S100A10;NKD2
cellular calcium ion homeostasis (GO:0006874)	2/123	0.973586	0.999995	0	0	0.358952	0.00960865	SCGN;ATP2A3
positive regulation of protein targeting to mitochondrion (GO:1903955)	1981-01-01	0.973733	0.999995	0	0	0.271732	0.00723292	DPCR1
epidermis development (GO:0008544)	1981-01-01	0.973733	0.999995	0	0	0.271732	0.00723292	DSP
negative regulation of cell death (GO:0060548)	1981-01-01	0.973733	0.999995	0	0	0.271732	0.00723292	SOX4
positive regulation of protein catabolic process (GO:0045732)	1981-01-01	0.973733	0.999995	0	0	0.271732	0.00723292	TNF
protein modification by small protein removal (GO:0070646)	6/261	0.974466	0.999995	0	0	0.509705	0.013184	CYLD;PSMD7;KDM1B;RIPK1;SKP2;TP53
extracellular matrix organization (GO:0030198)	5/229	0.974544	0.999995	0	0	0.483776	0.0124742	DDR1;ITGB4;ITGA2;COL11A2;ITGA1
innate immune response activating cell surface receptor signaling pathway (GO:0002220)	2/124	0.974576	0.999995	0	0	0.355991	0.00916771	PSMD7;MUC21
negative regulation of macromolecule metabolic process (GO:0010605)	2/124	0.974576	0.999995	0	0	0.355991	0.00916771	NDFIP1;TNF
modulation of chemical synaptic transmission (GO:0050804)	1982-01-01	0.97489	0.999995	0	0	0.268363	0.00682474	CLSTN1
positive regulation of cell cycle (GO:0045787)	1982-01-01	0.97489	0.999995	0	0	0.268363	0.00682474	CCNB1
positive regulation of DNA metabolic process (GO:0051054)	1982-01-01	0.97489	0.999995	0	0	0.268363	0.00682474	RPS3
protein dephosphorylation (GO:0006470)	2/125	0.97553	0.999995	0	0	0.353078	0.00874733	RPRD1A;PTPRF
positive regulation of peptidyl-serine phosphorylation (GO:0033138)	1983-01-01	0.975995	0.999995	0	0	0.265077	0.00644073	TNF
regulation of mitotic nuclear division (GO:0007088)	1984-01-01	0.977052	0.999995	0	0	0.261869	0.00607938	EDN1
regulation of neuron differentiation (GO:0045664)	1984-01-01	0.977052	0.999995	0	0	0.261869	0.00607938	ID4
vesicle organization (GO:0016050)	2/127	0.977335	0.999995	0	0	0.347392	0.00796436	SNX18;S100A10
non-canonical Wnt signaling pathway (GO:0035567)	2/127	0.977335	0.999995	0	0	0.347392	0.00796436	PSMD7;AP2B1
regulation of mRNA stability (GO:0043488)	2/128	0.978188	0.999995	0	0	0.344617	0.00759995	PSMD7;RBM24
positive regulation of mitochondrion organization (GO:0010822)	2/128	0.978188	0.999995	0	0	0.344617	0.00759995	DPCR1;TP53
regulation of protein processing (GO:0070613)	2/128	0.978188	0.999995	0	0	0.344617	0.00759995	C7;NKD2
calcium ion transmembrane transport (GO:0070588)	1986-01-01	0.979028	0.999995	0	0	0.255681	0.00541905	ATP2A3
regulation of peptidyl-serine phosphorylation (GO:0033135)	1986-01-01	0.979028	0.999995	0	0	0.255681	0.00541905	TNF
regulation of MAPK cascade (GO:0043408)	4/203	0.979739	0.999995	0	0	0.435718	0.00891859	DDR1;GSTP1;ERBB2;BMP6
protein glycosylation (GO:0006486)	2/130	0.979803	0.999995	0	0	0.339196	0.00692105	GCNT2;PARP8
calcium ion homeostasis (GO:0055074)	1987-01-01	0.979952	0.999995	0	0	0.252695	0.00511751	ATP2A3
organic substance transport (GO:0071702)	1987-01-01	0.979952	0.999995	0	0	0.252695	0.00511751	CD320
negative regulation of translation (GO:0017148)	1988-01-01	0.980835	0.999995	0	0	0.249777	0.0048335	RPS3
regulation of protein targeting to mitochondrion (GO:1903214)	1988-01-01	0.980835	0.999995	0	0	0.249777	0.0048335	DPCR1
peptidyl-serine modification (GO:0018209)	3/170	0.981267	0.999995	0	0	0.389619	0.00736804	GALNT4;MAST4;POC1B-GALNT4
cellular response to hypoxia (GO:0071456)	2/132	0.981301	0.999995	0	0	0.333943	0.00630357	PSMD7;TP53
positive regulation of cytosolic calcium ion concentration (GO:0007204)	2/133	0.982009	0.999995	0	0	0.331376	0.00601607	PTGER4;EDN1
Fc-gamma receptor signaling pathway involved in phagocytosis (GO:0038096)	2/133	0.982009	0.999995	0	0	0.331376	0.00601607	PIK3R1;ACTG1
regulation of Ras protein signal transduction (GO:0046578)	1990-01-01	0.982486	0.999995	0	0	0.244138	0.00431381	SMAP1
regulation of JNK cascade (GO:0046328)	1990-01-01	0.982486	0.999995	0	0	0.244138	0.00431381	RIPK1
positive regulation of protein kinase activity (GO:0045860)	3/172	0.982528	0.999995	0	0	0.384967	0.00678541	MAP3K1;CIB1;TNF
Fc-gamma receptor signaling pathway (GO:0038094)	2/134	0.982691	0.999995	0	0	0.328848	0.00574184	PIK3R1;ACTG1
phospholipase C-activating G-protein coupled receptor signaling pathway (GO:0007200)	1991-01-01	0.983257	0.999995	0	0	0.241413	0.00407619	RXFP3
positive regulation of macromolecule metabolic process (GO:0010604)	6/276	0.983311	0.999995	0	0	0.481005	0.00809518	CD63;HFE;RPS3;PRKAB1;TP53;TNF
cellular response to organic cyclic compound (GO:0071407)	2/135	0.983348	0.999995	0	0	0.326359	0.00548026	ADCY2;TNF
mitochondrial transport (GO:0006839)	2/135	0.983348	0.999995	0	0	0.326359	0.00548026	MRS2;TP53
Fc receptor mediated stimulatory signaling pathway (GO:0002431)	2/135	0.983348	0.999995	0	0	0.326359	0.00548026	PIK3R1;ACTG1
negative regulation of Wnt signaling pathway (GO:0030178)	3/174	0.983709	0.999995	0	0	0.380425	0.00624865	CYLD;PSMD7;NKD2
cell cycle G1/S phase transition (GO:0044843)	1992-01-01	0.983994	0.999995	0	0	0.238748	0.0038522	CDK7
MAPK cascade (GO:0000165)	6/278	0.984246	0.999995	0	0	0.477418	0.00758108	PTGER4;PSMD7;PABPN1;ERBB2;IL31RA;TNF
protein autophosphorylation (GO:0046777)	3/175	0.98427	0.999995	0	0	0.378193	0.00599634	DDR1;ERBB2;RIPK1
muscle contraction (GO:0006936)	2/137	0.98459	0.999995	0	0	0.32149	0.0049927	PABPN1;ITGA1
regulation of transcription from RNA polymerase II promoter in response to stress (GO:0043618)	1993-01-01	0.984699	0.999995	0	0	0.23614	0.00364101	PSMD7
response to cytokine (GO:0034097)	2/138	0.985177	0.999995	0	0	0.319109	0.00476561	RIPK1;OSMR
regulation of canonical Wnt signaling pathway (GO:0060828)	4/213	0.985333	0.999995	0	0	0.414651	0.00612655	CYLD;PSMD7;SOX4;NKD2
regulation of angiogenesis (GO:0045765)	3/177	0.985337	0.999995	0	0	0.373807	0.00552171	FOXC1;ERBB2;ISL1
vesicle fusion (GO:0006906)	1994-01-01	0.985373	0.999995	0	0	0.233589	0.00344185	NKD2
axon development (GO:0061564)	1994-01-01	0.985373	0.999995	0	0	0.233589	0.00344185	LRRC70
neuron differentiation (GO:0030182)	2/139	0.985742	0.999995	0	0	0.316763	0.00454896	ID4;SOX4
DNA metabolic process (GO:0006259)	7/314	0.985839	0.999995	0	0	0.493137	0.00703327	NT5E;PAPD7;RPS3;UBE2V2;RAD17;TP53;GTF2H4
negative regulation of protein phosphorylation (GO:0001933)	3/178	0.985844	0.999995	0	0	0.371651	0.00529861	QARS;GSTP1;CIB1
regulation of heart contraction (GO:0008016)	1995-01-01	0.986018	0.999995	0	0	0.231092	0.003254	ATP2A3
interleukin-1-mediated signaling pathway (GO:0070498)	1995-01-01	0.986018	0.999995	0	0	0.231092	0.003254	PSMD7
positive regulation of Wnt signaling pathway (GO:0030177)	2/140	0.986286	0.999995	0	0	0.314451	0.00434227	PSMD7;SOX4
positive regulation of protein metabolic process (GO:0051247)	1996-01-01	0.986634	0.999995	0	0	0.228647	0.00307679	TNF
protein localization to nucleus (GO:0034504)	1996-01-01	0.986634	0.999995	0	0	0.228647	0.00307679	IPO11
cellular metal ion homeostasis (GO:0006875)	1996-01-01	0.986634	0.999995	0	0	0.228647	0.00307679	ATP2A3
cell morphogenesis involved in neuron differentiation (GO:0048667)	1997-01-01	0.987222	0.999995	0	0	0.226253	0.00290959	LRRC70
negative regulation of cell motility (GO:2000146)	1997-01-01	0.987222	0.999995	0	0	0.226253	0.00290959	SPINT2
cell-cell adhesion via plasma-membrane adhesion molecules (GO:0098742)	2/142	0.987314	0.999995	0	0	0.309927	0.00395689	CDH6;CLDN7
Fc-epsilon receptor signaling pathway (GO:0038095)	3/182	0.98771	0.999995	0	0	0.363269	0.00449235	PSMD7;MAP3K1;PIK3R1
phosphatidylinositol biosynthetic process (GO:0006661)	1998-01-01	0.987785	0.999995	0	0	0.223909	0.00275181	PIK3R1
response to molecule of bacterial origin (GO:0002237)	1998-01-01	0.987785	0.999995	0	0	0.223909	0.00275181	LRRC70
phosphate-containing compound metabolic process (GO:0006796)	3/183	0.988138	0.999995	0	0	0.361232	0.00431063	ITPK1;PLCD3;SLC17A4
Fc receptor signaling pathway (GO:0038093)	3/183	0.988138	0.999995	0	0	0.361232	0.00431063	PSMD7;MAP3K1;PIK3R1
cellular protein complex assembly (GO:0043623)	2/144	0.988267	0.999995	0	0	0.305529	0.00360602	CLTB;FBXL7
glycosaminoglycan biosynthetic process (GO:0006024)	1999-01-01	0.988324	0.999995	0	0	0.221613	0.00260289	GCNT2
positive regulation of MAPK cascade (GO:0043410)	6/289	0.98857	0.999995	0	0	0.458593	0.00527183	DDR1;EDN1;ERBB2;GCNT2;CIB1;TNF
peptidyl-serine phosphorylation (GO:0018105)	2/145	0.988717	0.999995	0	0	0.303377	0.00344254	MAST4;RIPK1
cellular response to transforming growth factor beta stimulus (GO:0071560)	1/100	0.988838	0.999995	0	0	0.219363	0.0024623	GCNT2
transcription, DNA-templated (GO:0006351)	8/356	0.989286	0.999995	0	0	0.496673	0.00534986	CDK7;SUPT4H1;HIVEP1;TRIP13;TP53;RREB1;GTF2H4;ILF2
protein processing (GO:0016485)	1/101	0.98933	0.999995	0	0	0.217158	0.00232958	HM13
metal ion transport (GO:0030001)	1/101	0.98933	0.999995	0	0	0.217158	0.00232958	SLC17A4
intrinsic apoptotic signaling pathway (GO:0097193)	1/101	0.98933	0.999995	0	0	0.217158	0.00232958	TP53
Ras protein signal transduction (GO:0007265)	4/223	0.98944	0.999995	0	0	0.395508	0.00419883	RAB3C;TP53;RREB1;AIF1
axonogenesis (GO:0007409)	4/223	0.98944	0.999995	0	0	0.395508	0.00419883	LYPLA2;LRRC70;PIK3R1;ISL1
regulation of GTPase activity (GO:0043087)	3/188	0.990072	0.999995	0	0	0.351376	0.003506	SNX18;ERBB2;S100A10
regulation of intracellular signal transduction (GO:1902531)	10/422	0.990225	0.999995	0	0	0.523818	0.00514565	CYLD;TRIO;DYRK2;SETD9;PAK1IP1;RAD17;PRKAB1;TNF;TP53;BMP6
positive regulation of angiogenesis (GO:0045766)	1/103	0.990249	0.999995	0	0	0.212877	0.00208587	ISL1
protein complex assembly (GO:0006461)	3/189	0.99042	0.999995	0	0	0.349469	0.00336397	HIST1H4A;RIPK1;TNF
monovalent inorganic cation transport (GO:0015672)	1/104	0.990679	0.999995	0	0	0.210799	0.00197407	SLC17A4
positive regulation of vasculature development (GO:1904018)	1/104	0.990679	0.999995	0	0	0.210799	0.00197407	ISL1
positive regulation of lymphocyte activation (GO:0051251)	1/104	0.990679	0.999995	0	0	0.210799	0.00197407	HLA-DPA1
phagocytosis, engulfment (GO:0006911)	1/104	0.990679	0.999995	0	0	0.210799	0.00197407	AIF1
negative regulation of apoptotic process (GO:0043066)	12/485	0.990707	0.999995	0	0	0.546994	0.00510703	DDR1;RNF144B;QARS;GSTP1;ERBB2;IL31RA;DHCR24;CIB1;PIK3R1;SOD2;ISL1;TP53
transcription from RNA polymerase II promoter (GO:0006366)	12/485	0.990707	0.999995	0	0	0.546994	0.00510703	RXRB;CDK7;CCNB1;PABPN1;MAZ;SUPT4H1;HIVEP1;E2F3;TRIP13;RPRD1A;RREB1;GTF2H4
negative regulation of cell differentiation (GO:0045596)	2/150	0.990725	0.999995	0	0	0.29305	0.00273058	TRIO;TNF
cellular response to cytokine stimulus (GO:0071345)	11/456	0.991007	0.999995	0	0	0.533145	0.00481635	FOXC1;IL31RA;RPS3;CIB1;RIPK1;PIK3R1;OSMR;TNF;TP53;AIF1;HLA-DPA1
G1/S transition of mitotic cell cycle (GO:0000082)	1/105	0.99109	0.999995	0	0	0.208761	0.00186845	CDK7
mRNA export from nucleus (GO:0006406)	1/105	0.99109	0.999995	0	0	0.208761	0.00186845	PABPN1
positive regulation of GTPase activity (GO:0043547)	3/192	0.991396	0.999995	0	0	0.343867	0.0029713	SNX18;ERBB2;S100A10
positive regulation of cellular catabolic process (GO:0031331)	1/106	0.991482	0.999995	0	0	0.206762	0.00176866	TNF
cellular response to starvation (GO:0009267)	1/107	0.991858	0.999995	0	0	0.204801	0.00167436	TP53
regulation of protein activation cascade (GO:2000257)	1/108	0.992217	0.999995	0	0	0.202876	0.00158524	C7
negative regulation of hydrolase activity (GO:0051346)	1/108	0.992217	0.999995	0	0	0.202876	0.00158524	TP53
activation of protein kinase activity (GO:0032147)	4/233	0.992434	0.999995	0	0	0.378037	0.002871	GHR;MAP3K1;ADCY2;TNF
regulation of complement activation (GO:0030449)	1/109	0.99256	0.999995	0	0	0.200987	0.001501	C7
Wnt signaling pathway (GO:0016055)	1/109	0.99256	0.999995	0	0	0.200987	0.001501	SOX4
ribonucleoprotein complex assembly (GO:0022618)	2/156	0.992678	0.999995	0	0	0.281544	0.00206895	ABT1;BRIX1
macroautophagy (GO:0016236)	1/110	0.992888	0.999995	0	0	0.199133	0.00142137	PRKAB1
cellular response to insulin stimulus (GO:0032869)	1/110	0.992888	0.999995	0	0	0.199133	0.00142137	PIK3R1
regulation of protein binding (GO:0043393)	1/111	0.993201	0.999995	0	0	0.197312	0.00134609	HFE
axon guidance (GO:0007411)	2/158	0.993235	0.999995	0	0	0.277905	0.0018864	LYPLA2;PIK3R1
proteasomal protein catabolic process (GO:0010498)	4/237	0.993388	0.999995	0	0	0.371468	0.00246444	PSMD7;PCBP2;MARCH6;TP53
ubiquitin-dependent protein catabolic process (GO:0006511)	7/341	0.993425	0.999995	0	0	0.452622	0.00298588	RNF144B;MYLIP;PSMD7;PPP1R11;PCBP2;TP53;FBXL7
phosphatidylinositol metabolic process (GO:0046488)	1/112	0.993501	0.999995	0	0	0.195524	0.0012749	PIK3R1
protein phosphorylation (GO:0006468)	11/470	0.993675	0.999995	0	0	0.516496	0.00327705	DDR1;NIM1K;CDK7;MAP3K1;DYRK2;MAST4;ERBB2;PRPF4B;RIPK1;PRKAB1;GTF2H4
regulation of cell growth (GO:0001558)	3/201	0.993782	0.999995	0	0	0.328081	0.0020463	ERBB2;CIB1;TP53
regulation of humoral immune response (GO:0002920)	1/113	0.993787	0.999995	0	0	0.193768	0.00120759	C7
negative regulation of programmed cell death (GO:0043069)	9/408	0.993802	0.999995	0	0	0.486574	0.00302515	DDR1;RNF144B;GSTP1;ERBB2;IL31RA;DHCR24;CIB1;PIK3R1;TP53
regulation of immune effector process (GO:0002697)	1/114	0.994061	0.999995	0	0	0.192043	0.00114392	C7
peptidyl-lysine modification (GO:0018205)	1/115	0.994323	0.999995	0	0	0.190349	0.00108371	SIRT5
epithelium development (GO:0060429)	1/115	0.994323	0.999995	0	0	0.190349	0.00108371	HNRNPH3
negative regulation of cell growth (GO:0030308)	1/115	0.994323	0.999995	0	0	0.190349	0.00108371	TP53
positive regulation of protein phosphorylation (GO:0001934)	9/412	0.99444	0.999995	0	0	0.481641	0.00268542	DDR1;GHR;HFE;ERBB2;CIB1;RIPK1;TNF;TP53;BMP6
negative regulation of nucleic acid-templated transcription (GO:1903507)	10/444	0.994476	0.999995	0	0	0.496681	0.00275142	NIPBL;QARS;PRMT2;BASP1;GMNN;ZKSCAN3;ID4;JARID2;TNF;TP53
regulation of macroautophagy (GO:0016241)	1/116	0.994573	0.999995	0	0	0.188684	0.00102674	PRKAB1
regulation of cell migration (GO:0030334)	6/316	0.994929	0.999995	0	0	0.418051	0.00212543	EDN1;CD151;KIF2A;GCNT2;CIB1;SOD2
calcium ion transport (GO:0006816)	1/118	0.995041	0.999995	0	0	0.185439	0.00092186	ATP2A3
regulation of inflammatory response (GO:0050727)	2/166	0.995076	0.999995	0	0	0.264237	0.00130437	PTGER4;ISL1
negative regulation of cellular macromolecule biosynthetic process (GO:2000113)	12/512	0.995224	0.999995	0	0	0.516708	0.00247382	NIPBL;QARS;PRMT2;BASP1;GMNN;RPS3;ZKSCAN3;ID4;RAD17;JARID2;TNF;TP53
negative regulation of signal transduction (GO:0009968)	5/283	0.995232	0.999995	0	0	0.388691	0.00185786	DDR1;QARS;NFKBIL1;ERBB2;NKD2
positive regulation of B cell activation (GO:0050871)	1/119	0.99526	0.999995	0	0	0.183858	0.000873609	CD320
mitochondrion organization (GO:0007005)	2/167	0.995268	0.999995	0	0	0.262622	0.00124564	SIRT5;SOD2
actin filament organization (GO:0007015)	1/120	0.995469	0.999995	0	0	0.182303	0.000827946	CAP2
DNA replication (GO:0006260)	1/120	0.995469	0.999995	0	0	0.182303	0.000827946	RAD17
negative regulation of growth (GO:0045926)	1/120	0.995469	0.999995	0	0	0.182303	0.000827946	TP53
sulfur compound biosynthetic process (GO:0044272)	1/122	0.995859	0.999995	0	0	0.179271	0.000743821	GSTP1
regulation of apoptotic process (GO:0042981)	22/815	0.995899	0.999995	0	0	0.594766	0.002444	DDR1;UNC13B;MAP3K1;TRIO;PRMT2;GSTP1;GZMA;IL31RA;DHCR24;CIB1;PIK3R1;TNF;BMP6;GZMK;RNF144B;ERBB2;RPS3;TMEM219;RIPK1;SKP2;TP53;SOX4
cilium assembly (GO:0060271)	5/288	0.995945	0.999995	0	0	0.381723	0.00155096	ATAT1;TUBB;CEP72;POC1B;TUBB4B
inflammatory response (GO:0006954)	4/252	0.996034	0.999995	0	0	0.348723	0.00138565	PTGER4;AIF1;TNF;ABCF1
platelet degranulation (GO:0002576)	1/124	0.996217	0.999995	0	0	0.176337	0.000668435	CD63
negative regulation of multicellular organismal process (GO:0051241)	1/125	0.996383	0.999995	0	0	0.174906	0.000633723	TNF
transmembrane receptor protein tyrosine kinase signaling pathway (GO:0007169)	8/396	0.996508	0.999995	0	0	0.444521	0.00155504	DDR1;GHR;FOXC1;ERBB2;IL31RA;PIK3R1;AP2B1;ACTG1
cytoskeleton organization (GO:0007010)	1/126	0.996543	0.999995	0	0	0.173498	0.000600855	MAST4
positive regulation of gene expression (GO:0010628)	20/771	0.99696	0.999995	0	0	0.570907	0.00173799	FOXC1;FOXF2;PRMT2;HFE;IL31RA;PIK3R1;PRKAB1;TNF;ILF2;CDK7;HIST1H4A;ZNRD1;HIST1H3A;ERBB2;ZKSCAN3;RPS3;RIOK1;TP53;RREB1;SOX4
regulation of macromolecule metabolic process (GO:0060255)	1/129	0.99698	0.999995	0	0	0.169405	0.000512334	DDX4
generation of neurons (GO:0048699)	1/130	0.997113	0.999995	0	0	0.168083	0.000485889	ID4
positive regulation of nucleic acid-templated transcription (GO:1903508)	11/502	0.997252	0.999995	0	0	0.482006	0.00132651	CDK7;FOXC1;FOXF2;PRMT2;IL31RA;ZKSCAN3;RREB1;TNF;ILF2;TP53;SOX4
negative regulation of transcription from RNA polymerase II promoter (GO:0000122)	13/565	0.997263	0.999995	0	0	0.506204	0.0013875	IRX1;EDN1;FOXC1;FST;SUPT4H1;ISL1;TNF;BMP6;NIPBL;ZKSCAN3;HIVEP1;RREB1;TP53
phagocytosis (GO:0006909)	1/135	0.997696	0.999995	0	0	0.161768	0.000373127	AIF1
neutrophil degranulation (GO:0043312)	10/479	0.997858	0.999995	0	0	0.458754	0.000983629	DSP;CD63;PSMD7;GSTP1;TUBB;HFE;NDUFC2;TUBB4B;PRDX6;ILF2
receptor-mediated endocytosis (GO:0006898)	2/188	0.997963	0.999995	0	0	0.232713	0.000474536	CLTB;AP2B1
regulation of vesicle-mediated transport (GO:0060627)	1/138	0.997988	0.999995	0	0	0.158201	0.000318681	RAB3C
regulation of primary metabolic process (GO:0080090)	1/139	0.998076	0.999995	0	0	0.157046	0.000302393	PSMD7
neutrophil activation involved in immune response (GO:0002283)	10/483	0.998083	0.999995	0	0	0.454777	0.000872457	DSP;CD63;PSMD7;GSTP1;TUBB;HFE;NDUFC2;TUBB4B;PRDX6;ILF2
regulation of signal transduction (GO:0009966)	3/233	0.998089	0.999995	0	0	0.281957	0.000539344	DDR1;CD63;ERBB2
response to lipid (GO:0033993)	1/140	0.998161	0.999995	0	0	0.155908	0.000286954	MICB
regulation of small GTPase mediated signal transduction (GO:0051056)	1/140	0.998161	0.999995	0	0	0.155908	0.000286954	TRIO
cilium organization (GO:0044782)	2/192	0.998267	0.999995	0	0	0.227765	0.000395026	ATAT1;POC1B
neutrophil mediated immunity (GO:0002446)	10/487	0.998286	0.999995	0	0	0.450867	0.000773496	DSP;CD63;PSMD7;GSTP1;TUBB;HFE;NDUFC2;TUBB4B;PRDX6;ILF2
phosphorylation (GO:0016310)	7/386	0.998293	0.999995	0	0	0.397926	0.000679765	NIM1K;CDK7;MAP3K1;DYRK2;ERBB2;PRPF4B;PRKAB1
negative regulation of gene expression (GO:0010629)	14/618	0.99843	0.999995	0	0	0.497391	0.000781763	NDFIP1;PRMT2;GMNN;TNF;NIPBL;HIST1H4A;HIST1H3A;QARS;BASP1;RPS3;ZKSCAN3;ID4;JARID2;TP53
plasma membrane bounded cell projection assembly (GO:0120031)	3/241	0.998584	0.999995	0	0	0.272364	0.000385808	ATAT1;POC1B;AIF1
defense response to bacterium (GO:0042742)	3/241	0.998584	0.999995	0	0	0.272364	0.000385808	PPP1R11;MICA;HLA-E
regulated exocytosis (GO:0045055)	1/148	0.998718	0.999995	0	0	0.147361	0.000189044	CD63
cellular response to interleukin-1 (GO:0071347)	1/150	0.998828	0.999995	0	0	0.145368	0.000170401	PSMD7
regulation of autophagy (GO:0010506)	2/203	0.998891	0.999995	0	0	0.215176	0.000238727	ZKSCAN3;PRKAB1
proteolysis (GO:0006508)	4/291	0.998991	0.999995	0	0	0.300713	0.0003036	NLN;HM13;GZMA;PRSS16
neuron projection morphogenesis (GO:0048812)	1/163	0.999348	0.999995	0	0	0.133611	8.71821e-05	LRRC70
protein oligomerization (GO:0051259)	2/217	0.999374	0.999995	0	0	0.201015	0.000125954	RIPK1;TP53
glycerophospholipid biosynthetic process (GO:0046474)	1/164	0.999376	0.999995	0	0	0.132784	8.28289e-05	PIK3R1
negative regulation of transcription, DNA-templated (GO:0045892)	19/813	0.999426	0.999995	0	0	0.511193	0.00029368	IRX1;FOXC1;EDN1;PRMT2;FST;GMNN;SUPT4H1;ISL1;TNF;BMP6;NIPBL;QARS;BASP1;ZKSCAN3;HIVEP1;ID4;JARID2;TP53;RREB1
negative regulation of cellular process (GO:0048523)	10/534	0.999555	0.999995	0	0	0.409392	0.000182322	DDX4;BTN2A2;GMNN;ITGA1;IGFBP7;CIB1;SOD2;TP53;SOX4;HIST1H2AC
cellular response to oxygen-containing compound (GO:1901701)	3/274	0.999596	0.999995	0	0	0.23878	9.64598e-05	PABPN1;NFKBIL1;GSTP1
post-translational protein modification (GO:0043687)	5/357	0.999604	0.999995	0	0	0.305772	0.00012113	PSMD7;FBXO4;IGFBP7;SKP2;FBXL7
organonitrogen compound biosynthetic process (GO:1901566)	1/181	0.999709	0.999995	0	0	0.120136	3.49257e-05	GSTP1
positive regulation of cellular process (GO:0048522)	9/519	0.999752	0.999995	0	0	0.378416	9.37714e-05	EDN1;ERBB2;IL31RA;GCNT2;CIB1;OSMR;IL7R;ISL1;SOX4
anterograde trans-synaptic signaling (GO:0098916)	2/240	0.999756	0.999995	0	0	0.181369	4.43094e-05	UNC13B;SLC1A3
ion transport (GO:0006811)	3/289	0.999773	0.999995	0	0	0.226077	5.13805e-05	ATP2A3;SLC1A3;SLC17A4
nervous system development (GO:0007399)	7/455	0.999809	0.999995	0	0	0.335399	6.39768e-05	MYLIP;GUSBP1;NRSN1;ALDH5A1;MOG;GSTP1;JARID2
Golgi vesicle transport (GO:0048193)	2/271	0.99993	0.999995	0	0	0.160204	1.11352e-05	KIF2A;NKD2
ion transmembrane transport (GO:0034220)	1/219	0.999945	0.999995	0	0	0.0989956	5.41314e-06	ATP2A3
cellular protein localization (GO:0034613)	3/327	0.999946	0.999995	0	0	0.199159	1.0714e-05	CD63;RAB3C;NIPBL
regulation of nucleic acid-templated transcription (GO:1903506)	10/607	0.999948	0.999995	0	0	0.357922	1.85231e-05	ZNF131;FOXC1;PRMT2;ZNF391;GPBP1;SUPT4H1;HIVEP1;RREB1;TP53;SOX4
positive regulation of transcription from RNA polymerase II promoter (GO:0045944)	17/848	0.999951	0.999995	0	0	0.435122	2.12271e-05	FOXC1;EDN1;FOXF2;SUPT4H1;PIK3R1;ISL1;TNF;BMP6;RXRB;NIPBL;CDK7;SUB1;E2F3;RIPK1;TP53;RREB1;SOX4
transmembrane transport (GO:0055085)	4/378	0.999956	0.999995	0	0	0.229695	1.01041e-05	MRS2;PSMD7;ATP2A3;ABCF1
endosomal transport (GO:0016197)	1/229	0.999964	0.999995	0	0	0.0946037	3.40376e-06	SNX18
chemical synaptic transmission (GO:0007268)	2/289	0.999965	0.999995	0	0	0.150013	5.17692e-06	UNC13B;SLC1A3
regulation of cellular macromolecule biosynthetic process (GO:2000112)	10/631	0.999973	0.999995	0	0	0.343643	9.13874e-06	ZNF131;FOXC1;PRMT2;ZNF391;GPBP1;SUPT4H1;HIVEP1;RREB1;TP53;SOX4
intracellular protein transport (GO:0006886)	3/347	0.999974	0.999995	0	0	0.18738	4.93415e-06	RAB3C;IPO11;TNF
regulation of cell proliferation (GO:0042127)	13/740	0.999975	0.999995	0	0	0.380731	9.57516e-06	EDN1;ITGA1;NPR3;IL31RA;CIB1;OSMR;SOD2;GCNT2;IGFBP7;IL7R;TP53;SOX4;HIST1H2AC
organelle assembly (GO:0070925)	3/376	0.999989	0.999995	0	0	0.172545	1.88278e-06	ATAT1;RPS3;POC1B
endocytosis (GO:0006897)	1/263	0.99999	0.999995	0	0	0.0821787	8.58805e-07	SNX18
protein transport (GO:0015031)	2/326	0.99999	0.999995	0	0	0.132621	1.34883e-06	RAB3C;HFE
regulation of transcription, DNA-templated (GO:0006355)	26/1598	0.999994	0.999995	0	0	0.341109	2.04964e-06	FOXC1;ZNF131;GTF2H2C;ZNF391;GMNN;SUPT4H1;TNF;NIPBL;BASP1;GPBP1;ERBB2;ZKSCAN3;HIVEP1;JARID2;RREB1;SOX4;FOXF2;PRMT2;IL31RA;SOD2;ILF2;CDK7;QARS;SUB1;ID4;TP53
regulation of transcription from RNA polymerase II promoter (GO:0006357)	28/1478	0.999994	0.999995	0	0	0.401969	2.37645e-06	FOXC1;GTF2H2C;HFE;SUPT4H1;PIK3R1;TNF;RXRB;NIPBL;ERBB2;ZKSCAN3;HIVEP1;E2F3;RIPK1;RPRD1A;RREB1;SOX4;IRX1;EDN1;FOXF2;FST;SOD2;ISL1;GTF2H4;BMP6;CDK7;SUB1;ID4;TP53
regulation of gene expression (GO:0010468)	18/1037	0.999994	0.999995	0	0	0.372289	2.1712e-06	FOXC1;ZNF131;DDX4;NDFIP1;PRMT2;ZNF391;HFE;SUPT4H1;PRKAB1;TNF;HIST1H3A;GPBP1;HIVEP1;GCNT2;RPS3;TP53;RREB1;SOX4
vesicle-mediated transport (GO:0016192)	3/410	0.999994	0.999995	0	0	0.157844	9.1356e-07	SNX18;SMAP1;S100A10
positive regulation of transcription, DNA-templated (GO:0045893)	20/1120	0.999994	0.999995	0	0	0.38237	2.21e-06	FOXC1;EDN1;FOXF2;PRMT2;IL31RA;SUPT4H1;PIK3R1;ISL1;TNF;ILF2;BMP6;RXRB;CDK7;ERBB2;ZKSCAN3;E2F3;RIPK1;TP53;RREB1;SOX4
cellular protein modification process (GO:0006464)	14/1001	0.999995	0.999995	0	0	0.298086	1.58598e-06	DSP;NIM1K;MAP3K1;DYRK2;PRPF4B;PRKAB1;CDK7;PSMD7;ERBB2;FBXO4;GCNT2;IGFBP7;SKP2;FBXL7
